# Supplementary material for: Application of the Curtius rearrangement to the synthesis of 1′-aminoferrocene-1-carboxylic acid derivatives
Source: Royal Society of Chemistry journal article supplement (doi:10.1039/c7nj05020h), 2018-01-01

## Supporting Information

### Application of the Curtius rearrangement to the synthesis of 1'-aminoferrocene-1-carboxylic acid derivatives

William Erb,<sup>\*,†</sup> Gael Levanen,<sup>†</sup> Thierry Roisnel<sup>†</sup> and Vincent Dorcet<sup>†</sup>

<sup>†</sup> Univ Rennes, CNRS, ISCR (Institut des Sciences Chimiques de Rennes) - UMR 6226, F-35000 Rennes, France.

*william.erb@univ-rennes1.fr*

#### Table of Contents

|                                                                                |    |
|--------------------------------------------------------------------------------|----|
| Substrates' syntheses                                                          | S2 |
| IR spectra of the formation and consumption of compounds <b>3</b> and <b>4</b> | S4 |
| NMR spectra for compounds <b>1</b> – <b>19</b>                                 | S5 |

## Substrates' syntheses

**Dimethyl ferrocene-1,1'-dicarboxylate – SI1.** Under argon, BuLi (~1.6 M in hexanes, 78.1 mL, 125 mmol, 2.5 equiv) was added to a stirred solution of ferrocene (9.3 g, 50 mmol, 1.0 equiv) and TMEDA (18.7 mL, 14.5 g, 125 mmol, 2.5 equiv) in hexane (250 mL) and the reaction was stirred overnight at room temperature to give a deep red suspension. THF (100 mL) was added and the reaction mixture was cooled to -78 °C. Carbon dioxide was bubbled in the reaction mixture for 15 min and the reaction mixture was slowly warmed to room temperature upon bubbling. EtOAc (150 mL) was added and the organic phase was extracted with NaOH (10%, 3 x 100 mL). The combined aqueous layers were washed with EtOAc (2 x 100 mL) and acidified with HCl (12 M) until pH 1 was reached. The resulting solids were filtrated, washed with H<sub>2</sub>O and dried under high vacuum over P<sub>2</sub>O<sub>5</sub> to give crude ferrocene-1,1'-dicarboxylic acid. the title product as an orange solid containing 3-5% of ferrocenecarboxylic acid.

The crude product was dissolved in MeOH (150 mL), H<sub>2</sub>SO<sub>4</sub> (96%, 1.0 mL) was added dropwise and the reaction mixture was heated at methanol reflux overnight. The reaction mixture was cooled to room temperature and volatiles were removed under vacuum. EtOAc (100 mL) and NaHCO<sub>3</sub> (sat., 100 mL) were added and the layers were separated. The aqueous layer was further extracted with EtOAc (2 x 100 mL). The combined organic layers were dried over MgSO<sub>4</sub>, filtrated and concentrated under vacuum to give the crude product. This was purified by column chromatography on silica, eluting with EtOAc/heptane (80:20 to 70:30) to give ferrocene-1,1'-dimethylcarboxylate **SI1** (16.6 g, 70.5%) and methyl ferrocene carboxylate **SI2** (337.0 mg, 3%) as orange solids.

**Dimethyl ferrocene-1,1'-dicarboxylate (SI1):** mp 112-114 °C (lit.<sup>1</sup> 113.5-114.5 °C); IR (ATR): 3087, 2958, 1698, 1468, 1434, 1373, 1278, 1196, 1143, 1029, 964, 779 cm<sup>-1</sup>; <sup>1</sup>H NMR (300 MHz, CDCl<sub>3</sub>) δ 4.78 (t, *J* = 2.0 Hz, 4H, 4 x FcCH), 4.36 (t, *J* = 2.0 Hz, 4H, 4 x FcCH) 3.78 (s, 6H, 2 x CH<sub>3</sub>); <sup>13</sup>C NMR (75.4 MHz, CDCl<sub>3</sub>) δ 170.9 (2 x C=O), 73.1 (2 x FcC), 72.8 (4 x FcCH), 71.7 (4 x FcCH), 51.8 (2 x CH<sub>3</sub>). **Methyl ferrocene carboxylate (SI2):** mp 57-58 °C (lit.<sup>2</sup> 50-56 °C); IR (ATR): 2954, 1709, 1699, 1463, 1373, 1276, 1189, 1136, 1105, 1025, 961, 823 cm<sup>-1</sup>; <sup>1</sup>H NMR (500 MHz, CDCl<sub>3</sub>) δ 4.78 (t, *J* = 1.7 Hz, 2H, 2 x FcCH), 4.37 (t, *J* = 1.7 Hz, 2H, 2 x FcCH), 4.18 (s, 5H, 5 x FcCH), 3.78 (s, 3H, CH<sub>3</sub>); <sup>13</sup>C NMR (125.7 MHz, CDCl<sub>3</sub>) δ 172.4 (C=O), 71.4 (FcC), 71.2 (2 x FcCH), 70.3 (2 x FcCH), 69.9 (5 x FcCH), 51.7 (CH<sub>3</sub>).

**Sodium ferrocene-1,1'-dicarboxylate (SI3).** A solution of NaOH (2.17 g, 54.3 mmol, 8.2 equiv) in water (10 mL) was added to a solution of dimethyl ferrocene-1,1'-dicarboxylate (**SI1**, 2.0 g, 6.6 mmol, 1.0 equiv) in EtOH (10.0 mL) at 70 °C. After 2h at 75 °C, the reaction mixture was cooled to 0 °C and the resulting solids were filtrated, washed with cold EtOH (5 mL), Et<sub>2</sub>O (10 mL) and dried under vacuum to give the title product as a yellow solid (2.0 g, 95%). mp > 250 °C; IR (ATR): 3087, 1556, 1477, 1380, 1190, 1067, 1026, 806, 796 cm<sup>-1</sup>; <sup>1</sup>H NMR (300 MHz, D<sub>2</sub>O) δ 4.75 (s, 4H, 4 x FcCH), 4.43 (s, 4H, x FcCH); <sup>13</sup>C NMR (75.4 MHz, D<sub>2</sub>O) δ 179.4 (2 x C=O), 77.4 (2 x FcC), 73.1 (4 x FcCH), 71.0 (4 x FcCH).

**(9H-Fluoren-9-yl)methanol (SI4).** A modified procedure of Chong was followed:<sup>3</sup> BuLi (~1.6 M in hexanes, 37.5 mL, 60.0 mmol, 1.0 equiv) was added to a solution of fluorene (10.0 g, 60.0 mmol, 1.0 equiv) in anhydrous THF (250 mL) at 0 °C over 5 min. After 3 min stirring at 0 °C, paraformaldehyde (2.0 g, 66.0 mmol, 1.1 equiv) was added in one portion. The reaction mixture was warmed to room temperature and stirred for 90 min. NaHCO<sub>3</sub> sat. (150 mL) was added and the reaction mixture was extracted with Et<sub>2</sub>O (3 x 100 mL). The combined organic layers were dried over MgSO<sub>4</sub>, filtrated and concentrated under vacuum to give the crude product. This was purified by recrystallization in hexane/EtOH (600:8) to give the title product as a white solid (3.6 g, 30.5%). mp 100-102 °C (lit.<sup>3</sup> 100-101 °C); IR (ATR): 3252 (br), 1444, 1363, 1314, 1048, 1024, 754, 77, 725 cm<sup>-1</sup>; <sup>1</sup>H NMR (300 MHz, CDCl<sub>3</sub>) δ 7.77 (d, *J* = 7.4 Hz, 2H, ArH), 7.60 (d, *J* = 7.4 Hz, 2H, 2 x ArH), 7.40 (dt, *J* = 7.4, 0.7 Hz, 2H, 2 x ArH), 7.32 (dt, *J* = 7.4, 1.1 Hz, 2H, 2 x ArCH), 4.10 (t, *J* = 6.0 Hz, 1H, CH), 4.01 (t, *J* = 6.0 Hz, 2H, CH<sub>2</sub>), 1.64 (t, *J* = 6.0 Hz, 1H, OH); <sup>13</sup>C NMR (75.4 MHz, CDCl<sub>3</sub>) δ 144.5 (2 x ArC), 141.7 (2 x ArC), 127.7 (2 x ArCH), 127.3 (2 x ArCH), 124.9 (2 x ArCH), 120.2 (2 x ArCH), 65.3 (CH<sub>2</sub>), 50.6 (CH).

**Ferrocene-1,1'-dicarboxylic acid (2).** HCl (12 M) was added dropwise to a solution of sodium ferrocene-1,1'-dicarboxylate (**SI3**, 1.0 g, 3.1 mmol, 1.0 equiv) in water (20 mL) at 0 °C until pH 1 was

reached. The resulting solids were filtrated, washed with water and dried under high vacuum over P<sub>2</sub>O<sub>5</sub> to give the title product as an orange solid (800 mg, 93%). mp > 250 °C (decomp, lit.<sup>4</sup> > 250 °C); IR (ATR): 2885 (br), 2557, 1668, 1488, 1404, 1297, 1168, 1032, 917, 840, 751 cm<sup>-1</sup>; <sup>1</sup>H NMR (300 MHz, DMSO-d<sup>6</sup>) δ 12.32 (br s, 2H, 2 x CO<sub>2</sub>H), 4.69 (s, 4H, 4 x FcCH), 4.44 (s, 4H, 4 x FcCH); <sup>13</sup>C NMR (75.4 MHz, DMSO-d<sup>6</sup>) δ 171.1 (2 x C=O), 73.5 (2 x FcC); 72.6 (4 x FcCH); 71.3 (4 x FcCH).

1. Fischer, D. *Acta Crystallogr.* **1964**, *17*, 619.
2. Barišić, L.; Rapić, V.; Pritzkow, H.; Pavlović, G.; Nemet, I. *J. Organomet. Chem.* **2003**, *682*, 131-142.
3. Chong, J. M.; Lajoie, G.; Tjepkema, M. W. *Synthesis* **1992**, *1992*, 819-820.
4. Gao, B.; Yang, B.; Li, T.; Zhang, B. *Synth. Commun.* **2009**, *39*, 2973-2981.

### IR spectra of the formation and consumption of 3 and 4

Formation of **3** and **4**: top to bottom (1min, 1h, 2h 3h, 4h).

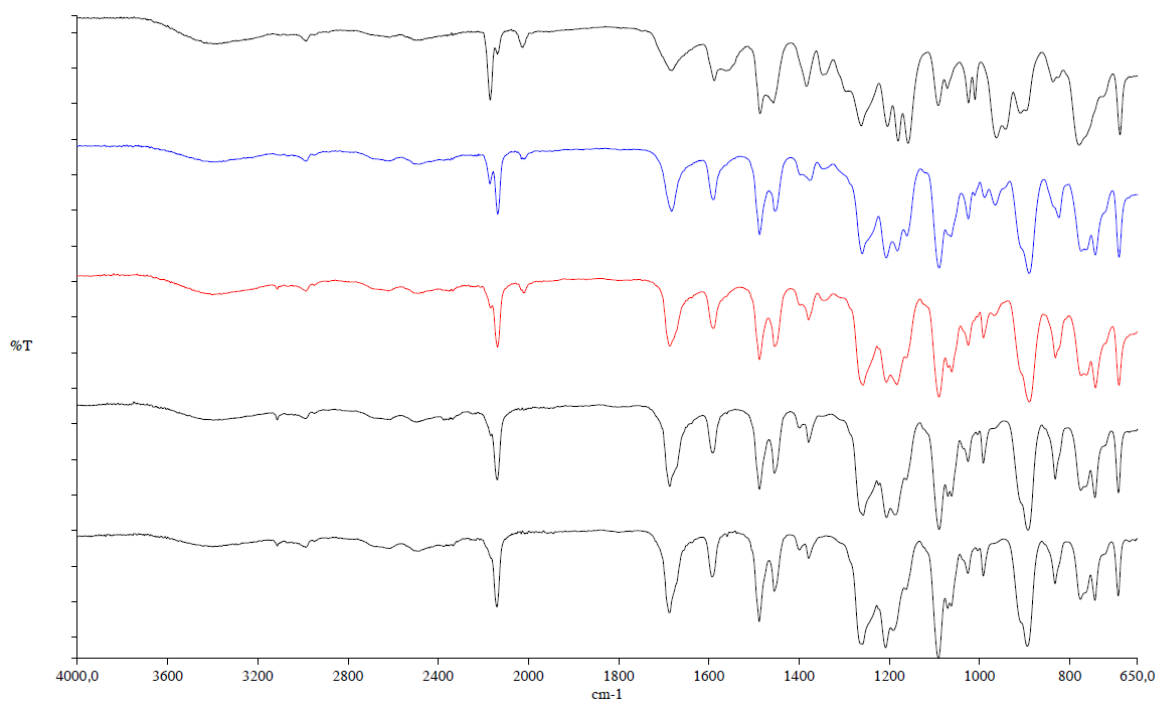

Formation of isocyanate from **4**: top to bottom (1 min, 10 min, 20 min, 40 min, 60 min).

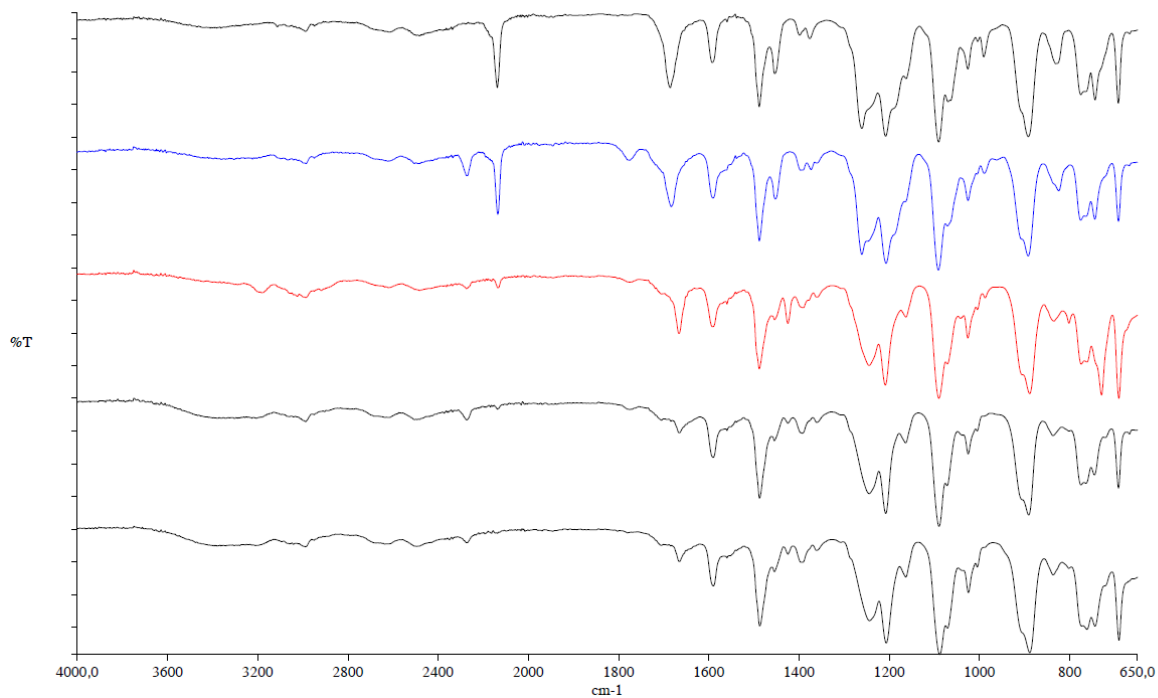

## NMR spectra for compounds 1 – 15 and SI1-4

### 1'-((*tert*-Butoxycarbonyl)amino)ferrocene-1-carboxylic acid - 1

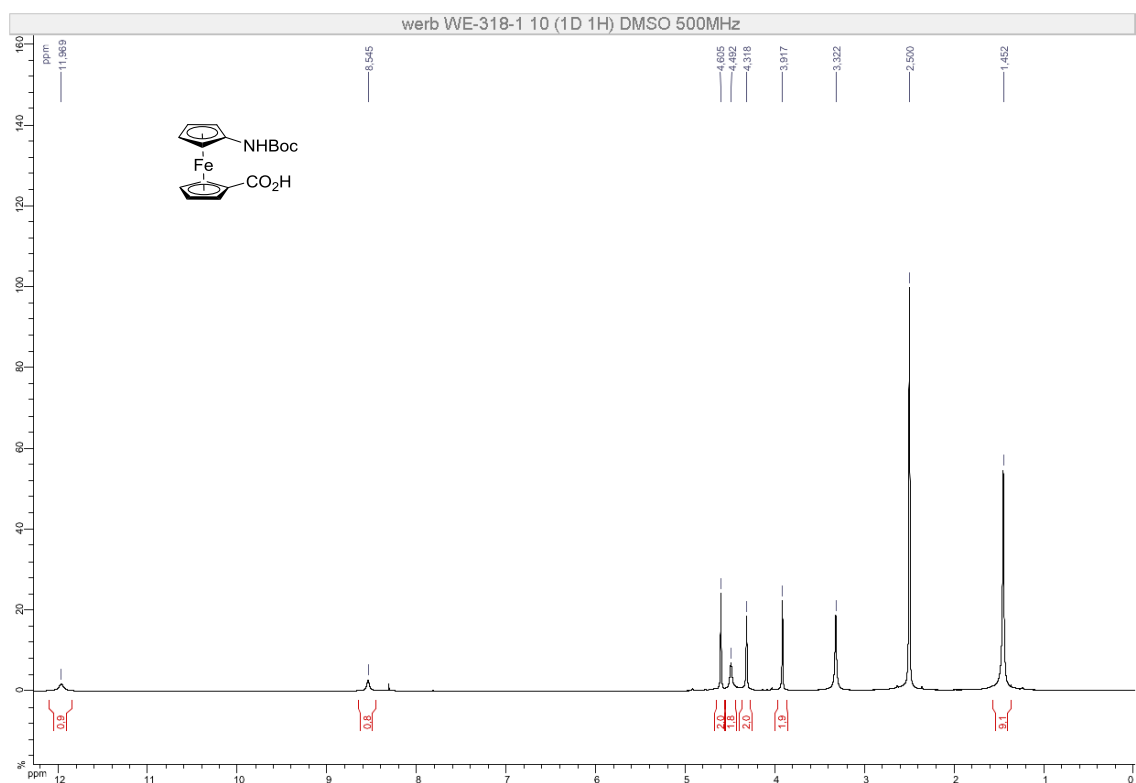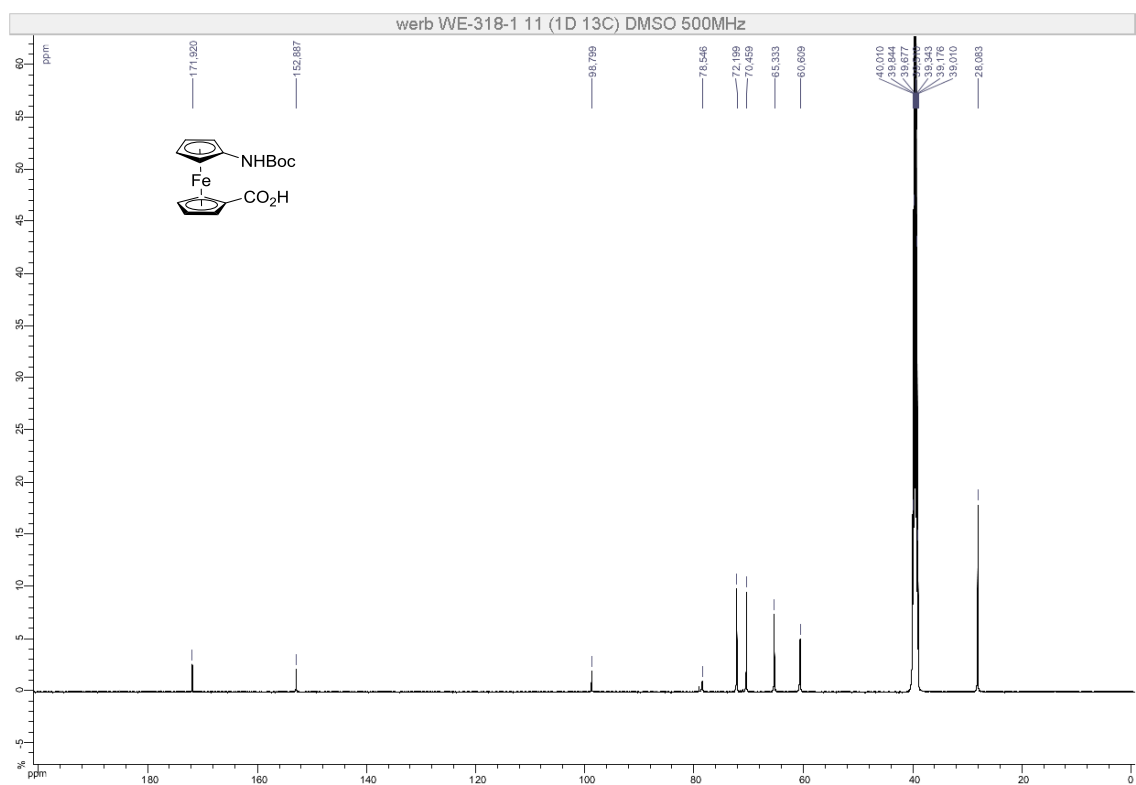

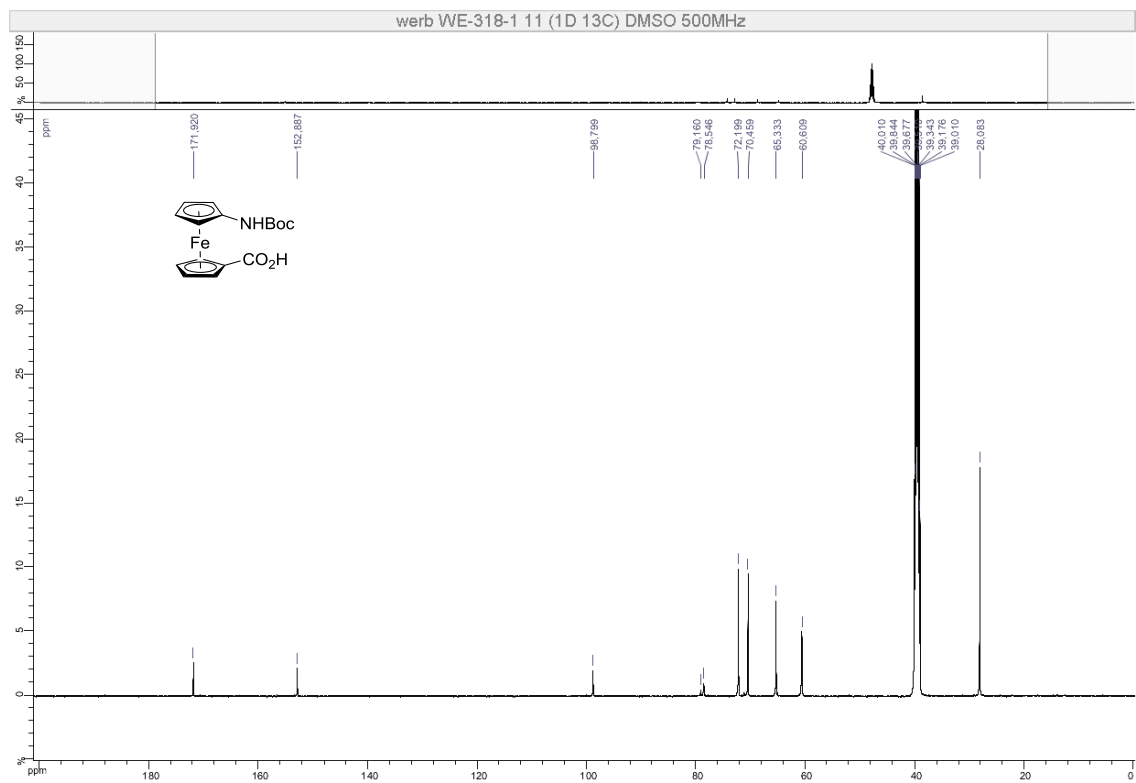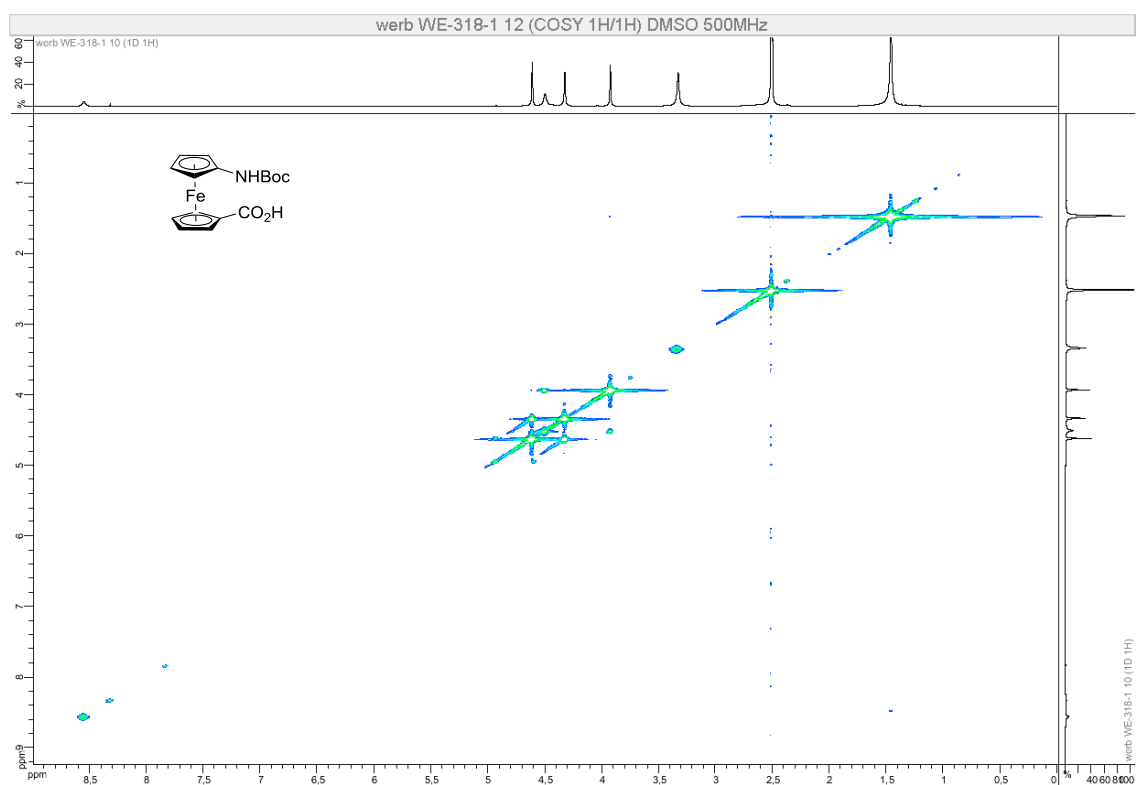

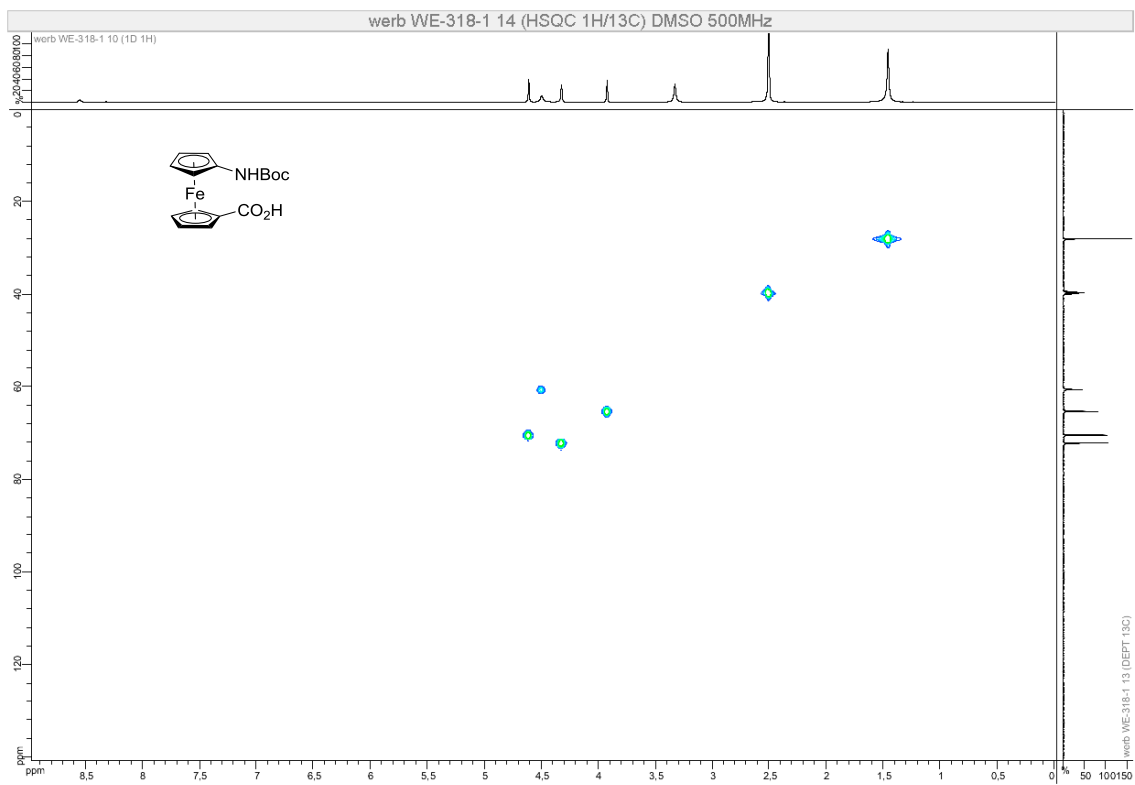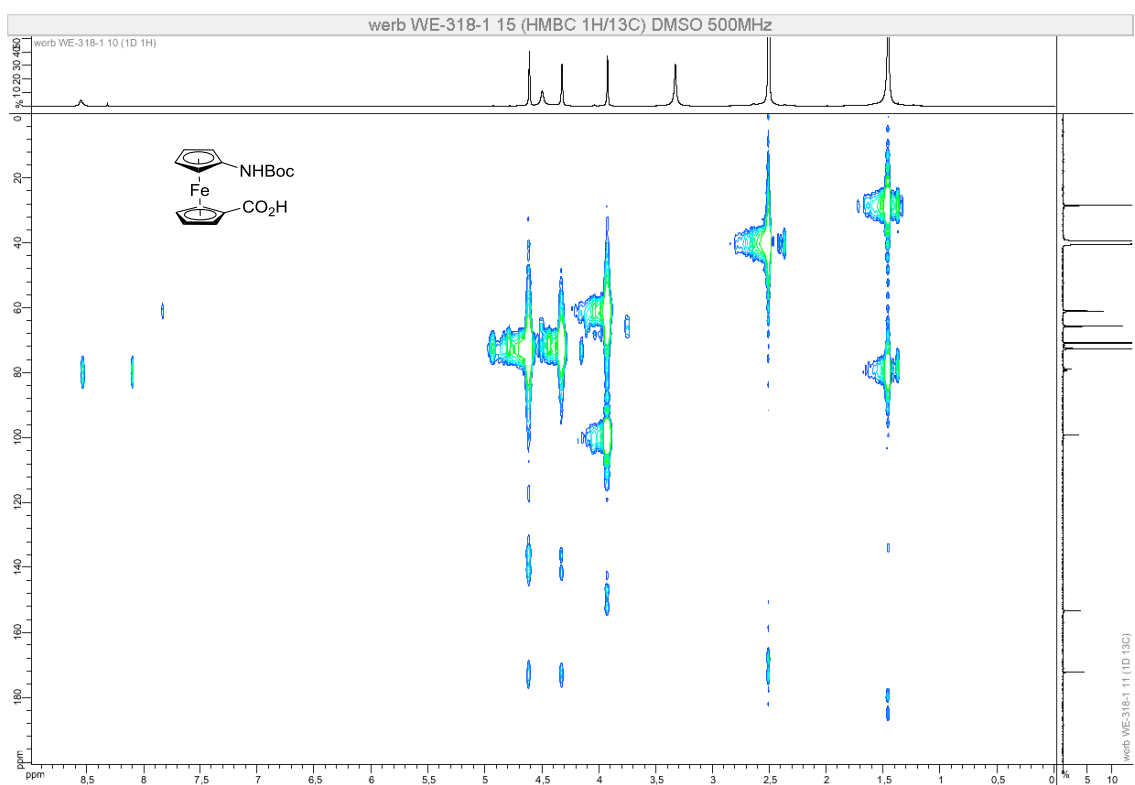





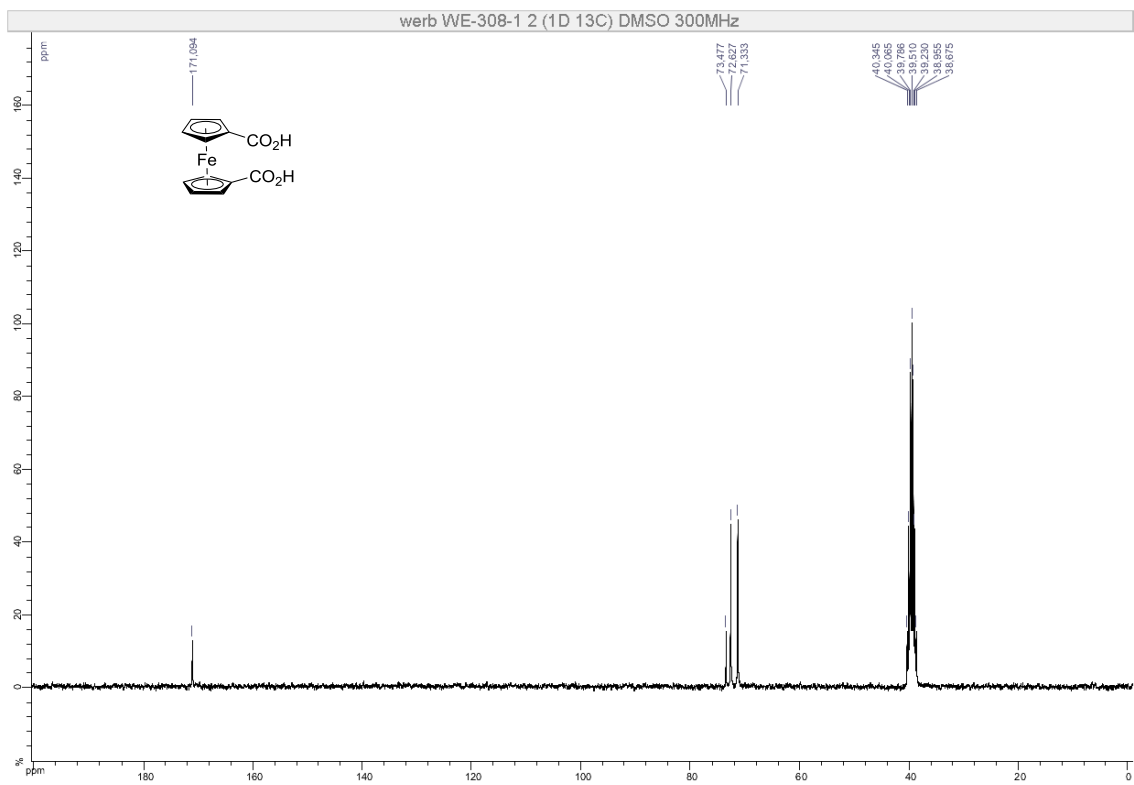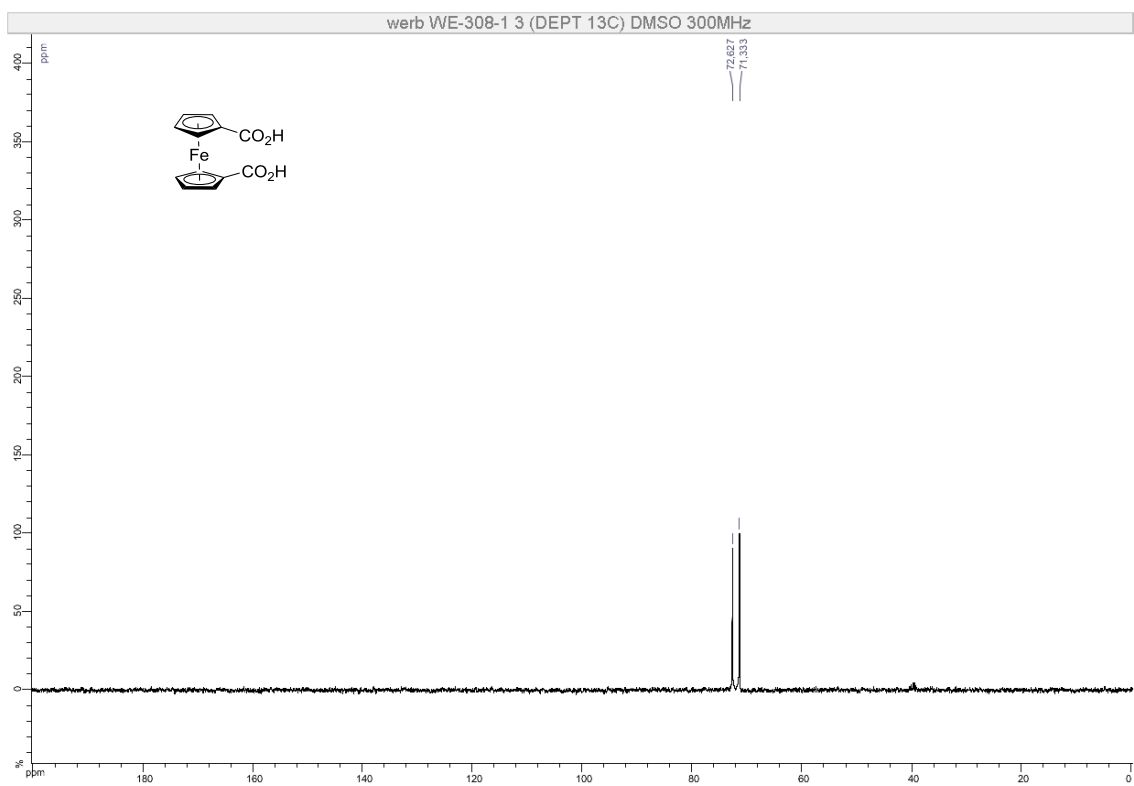

# **1,1'-Diazidocarbonylferrocene - 3**

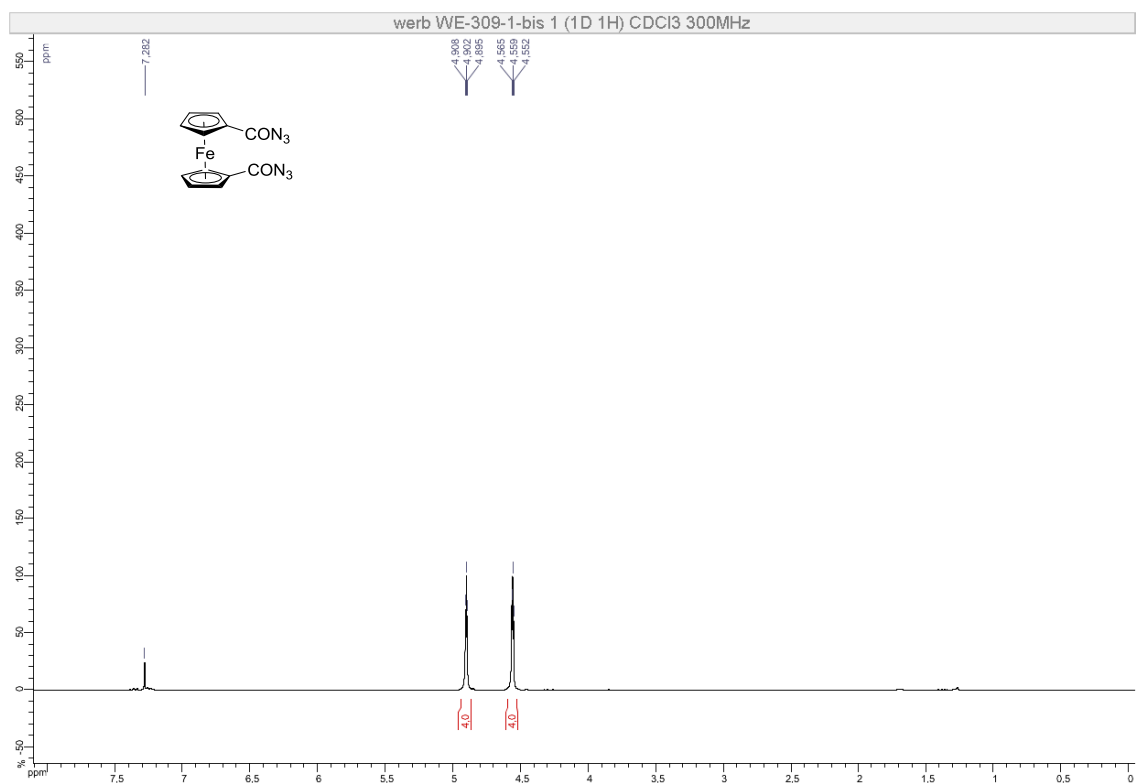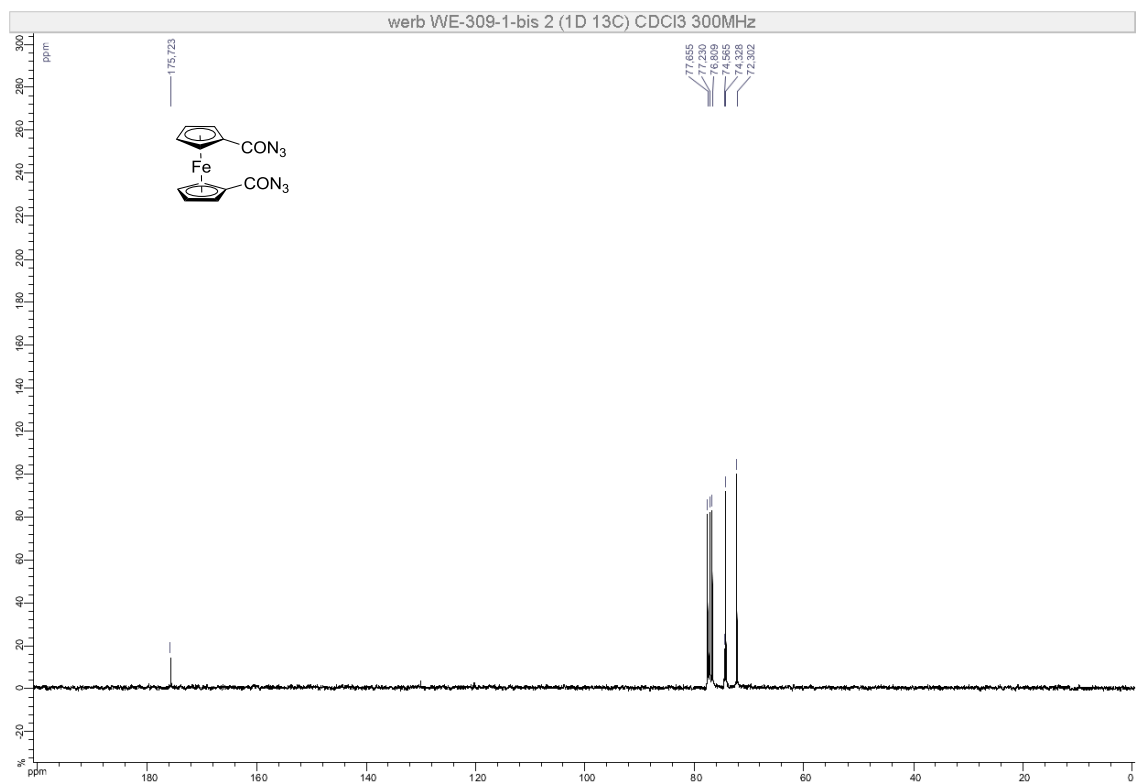

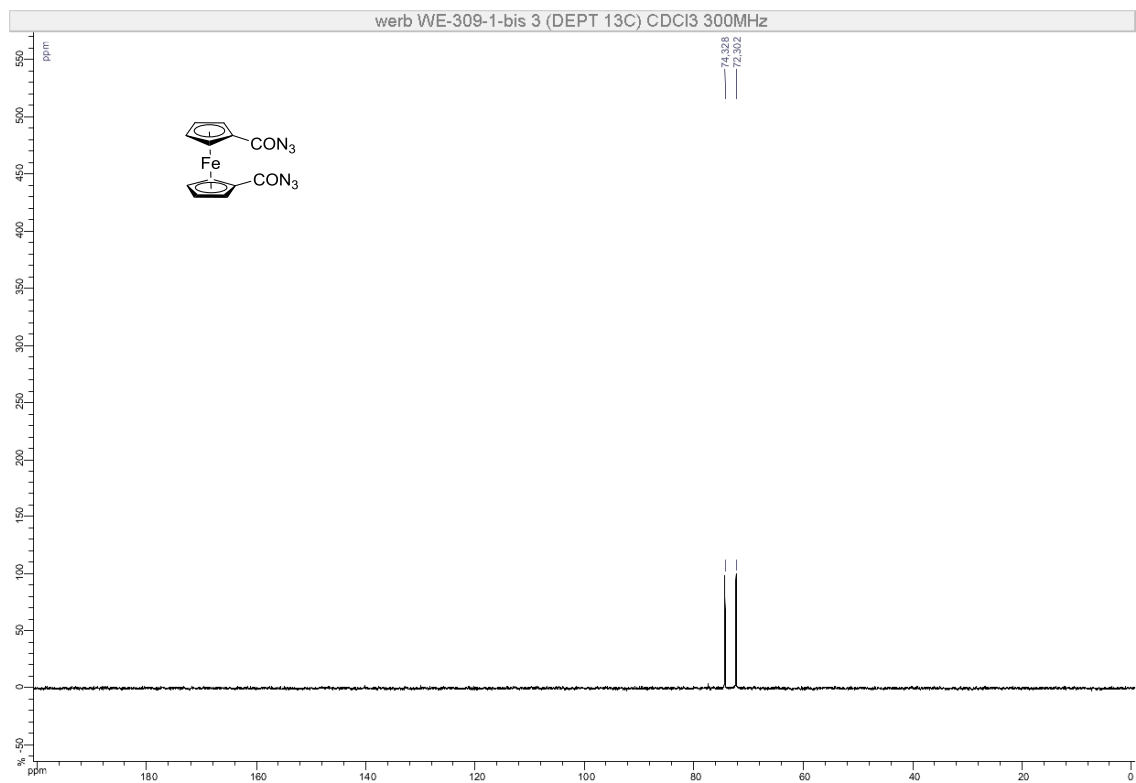

#### 1'-Azidocarbonylferrocene-1-carboxylic acid - 4

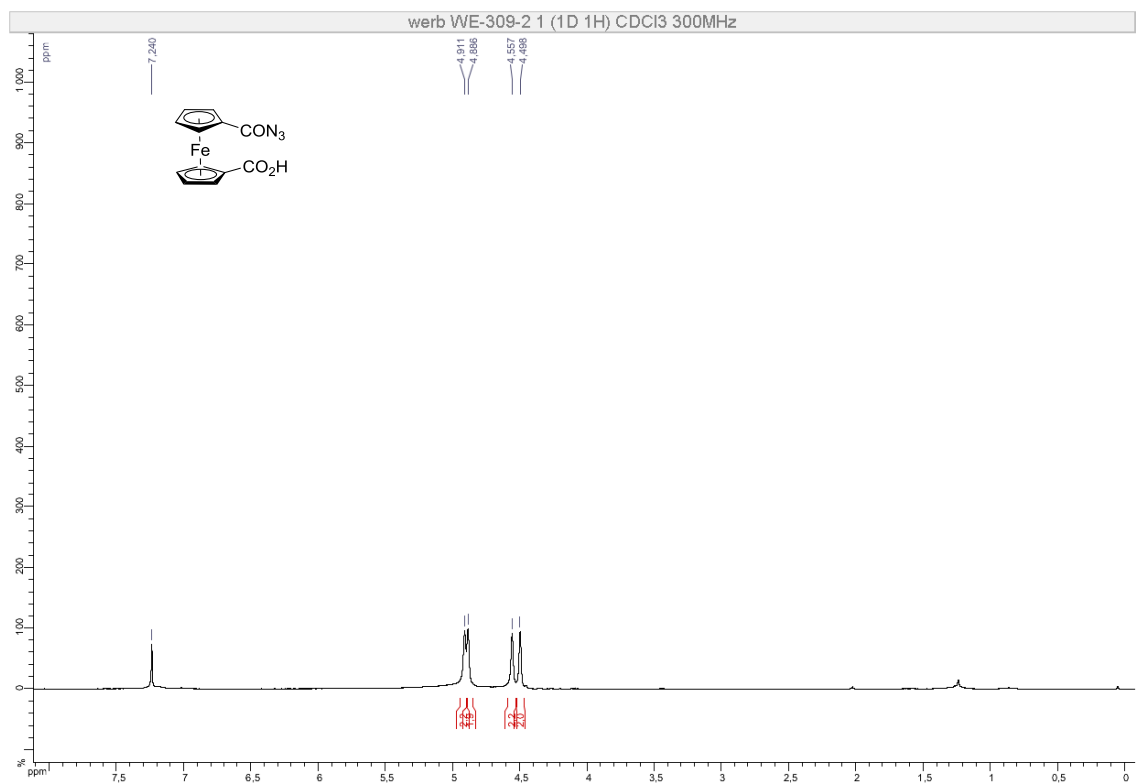

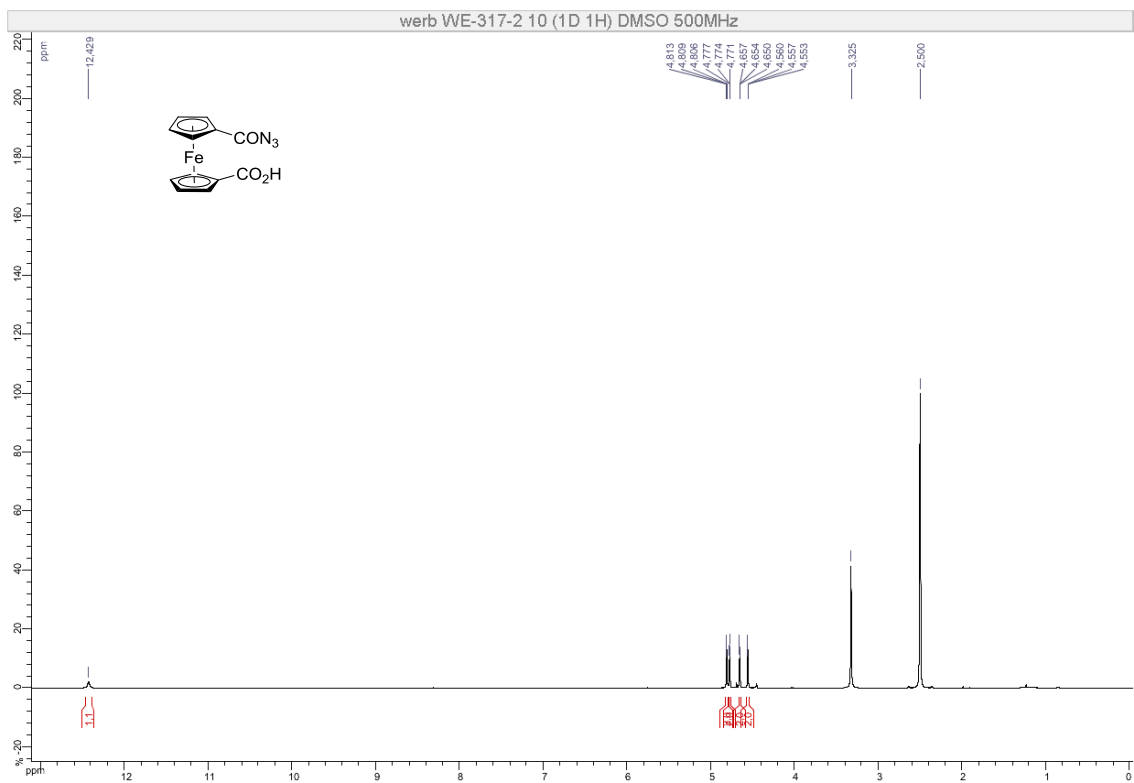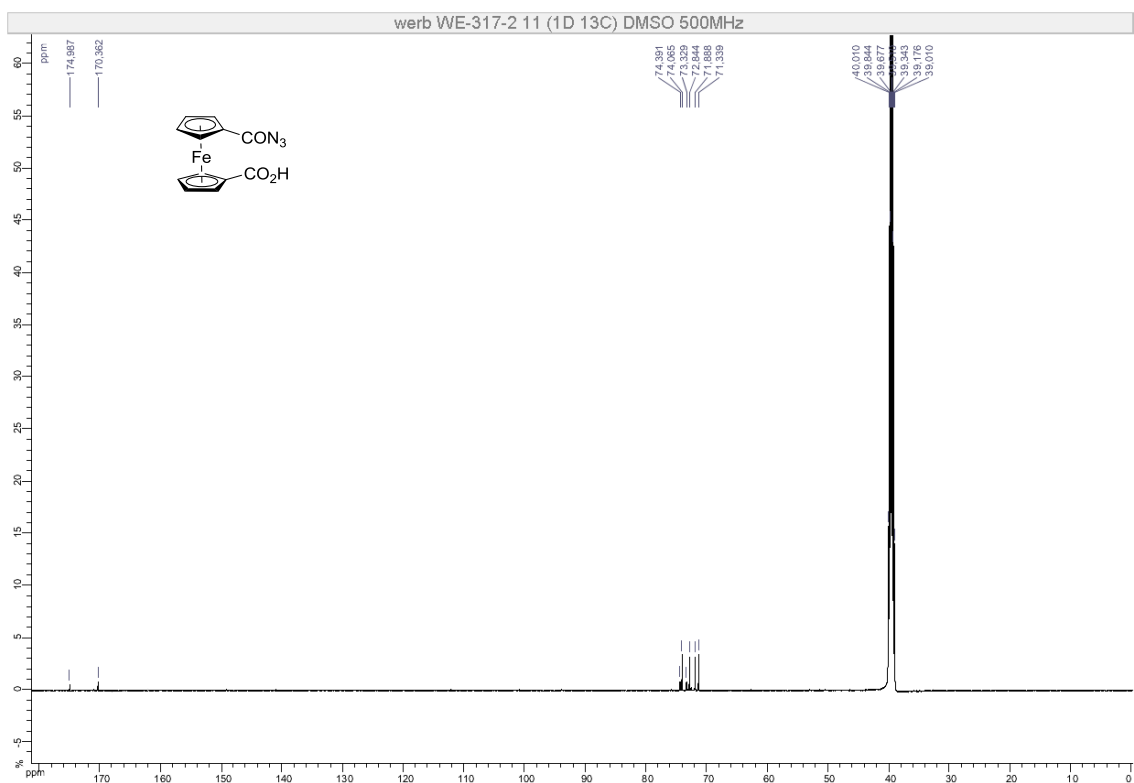

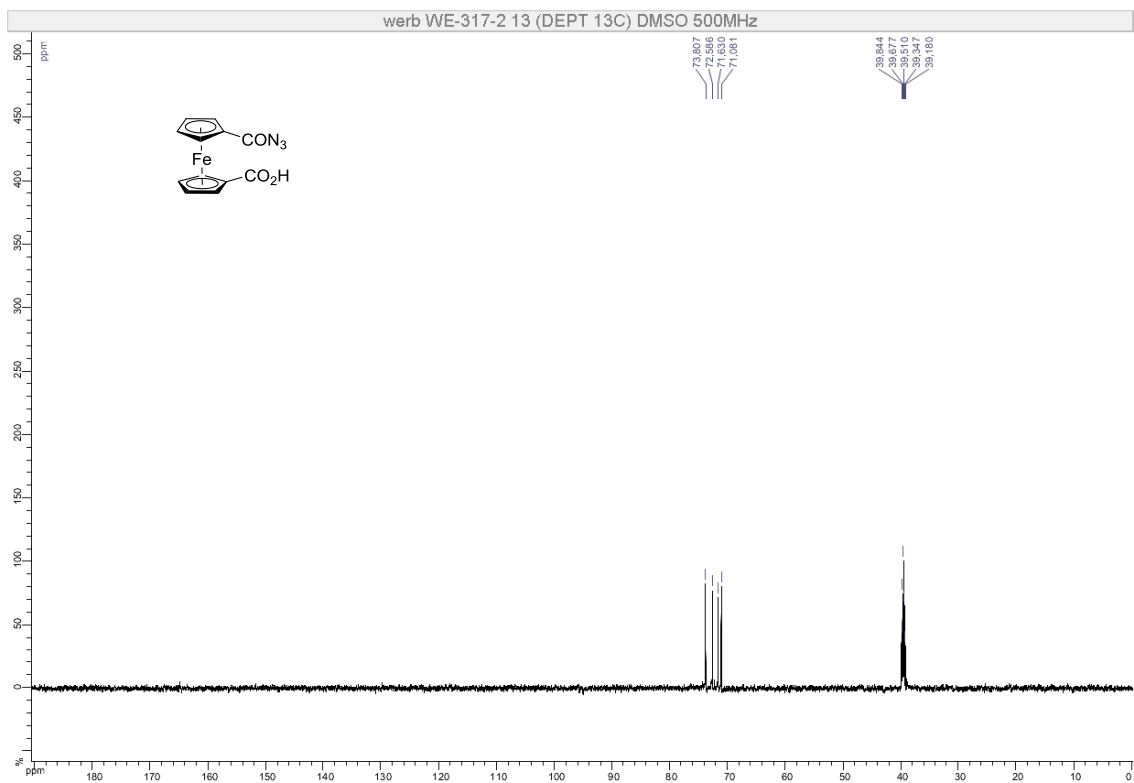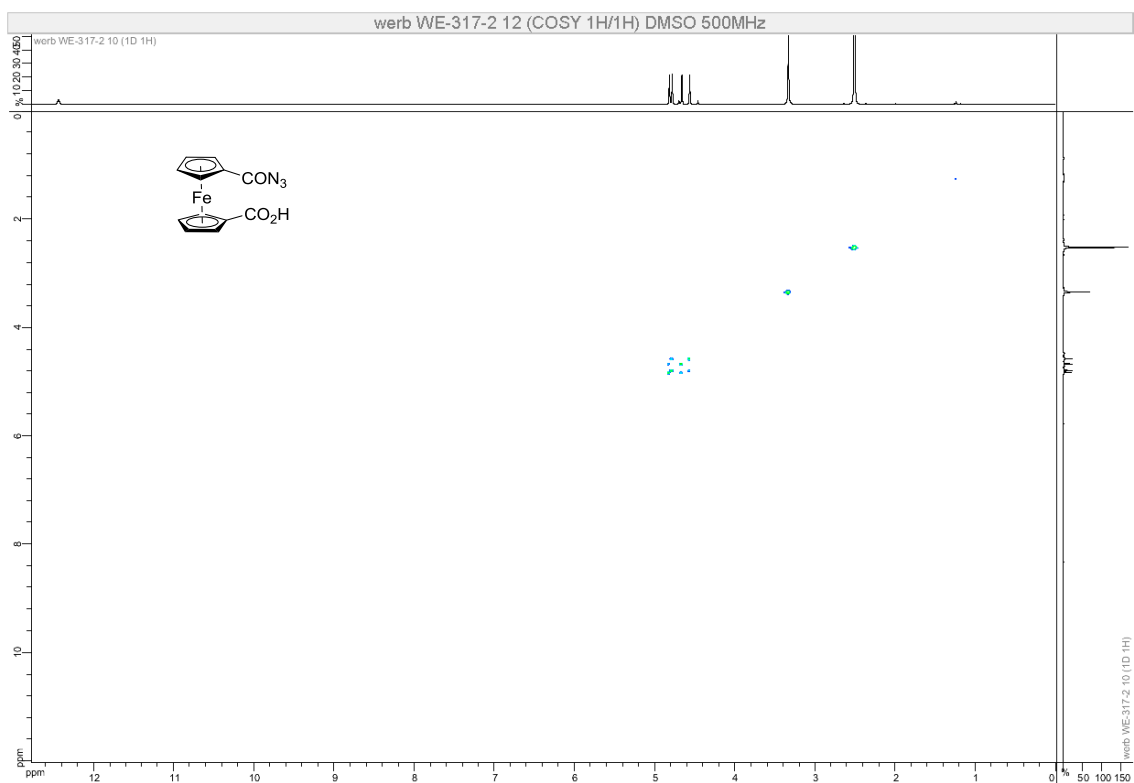



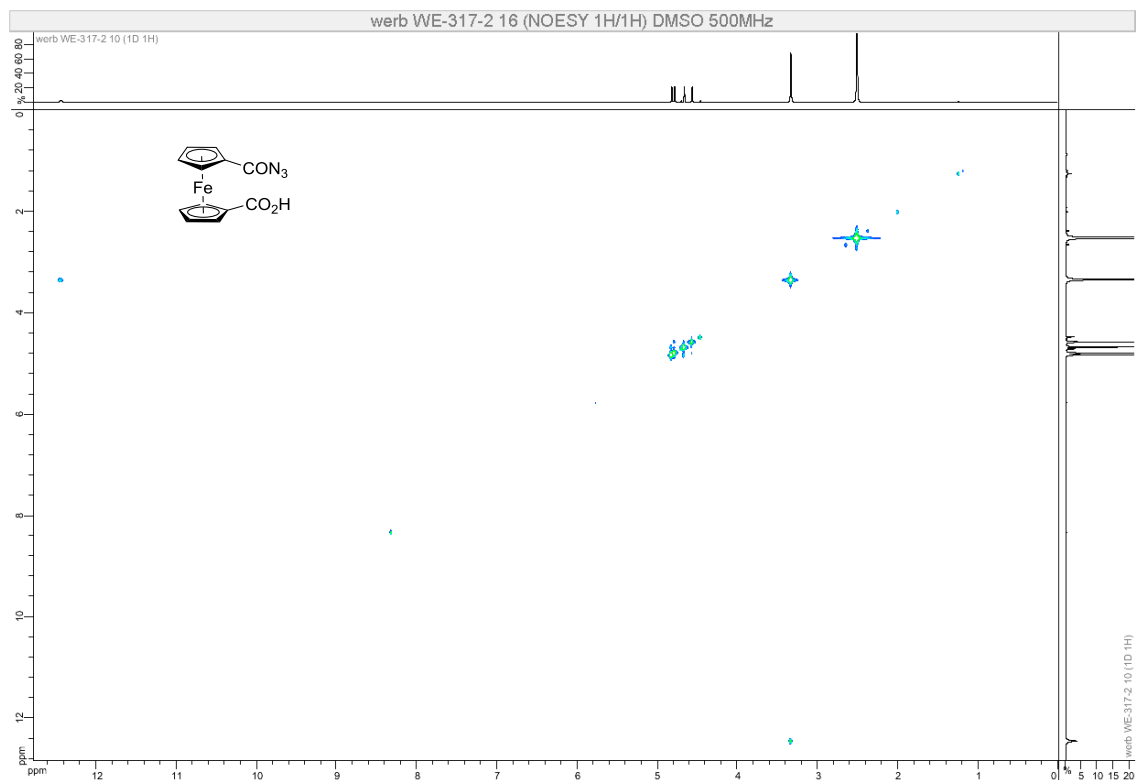

### Triethylammonium 1'-carboxyferrocene-1-carboxylate - 5

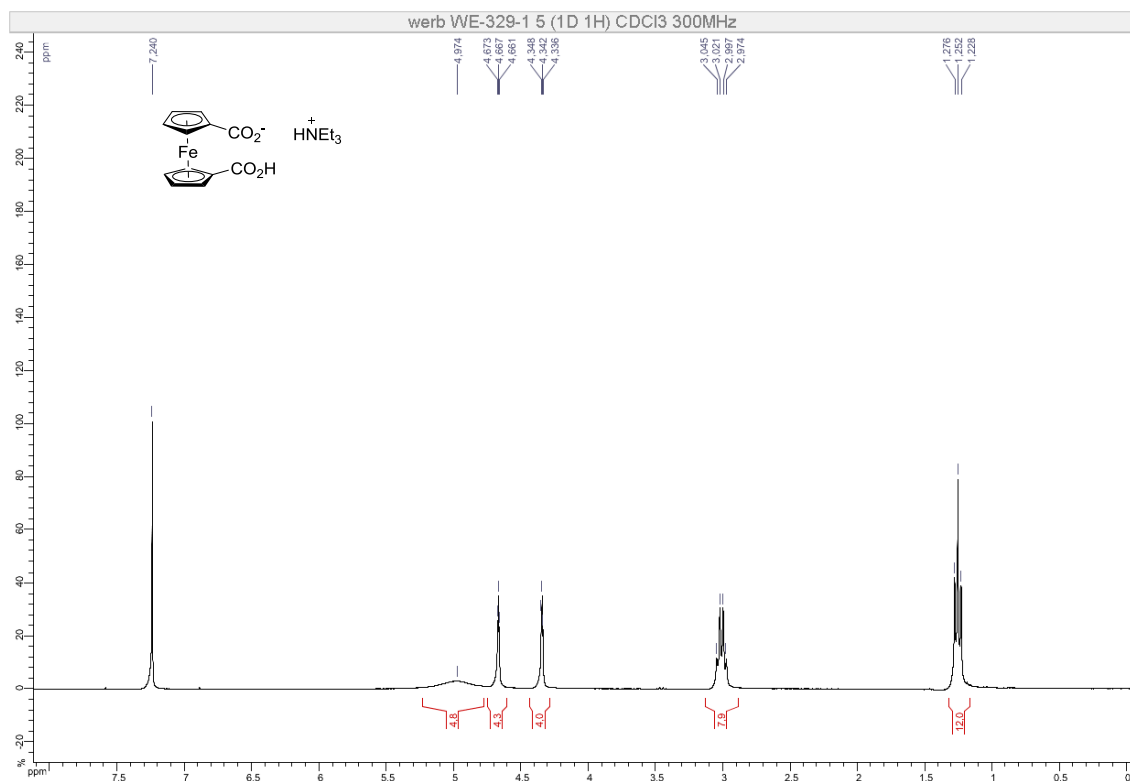

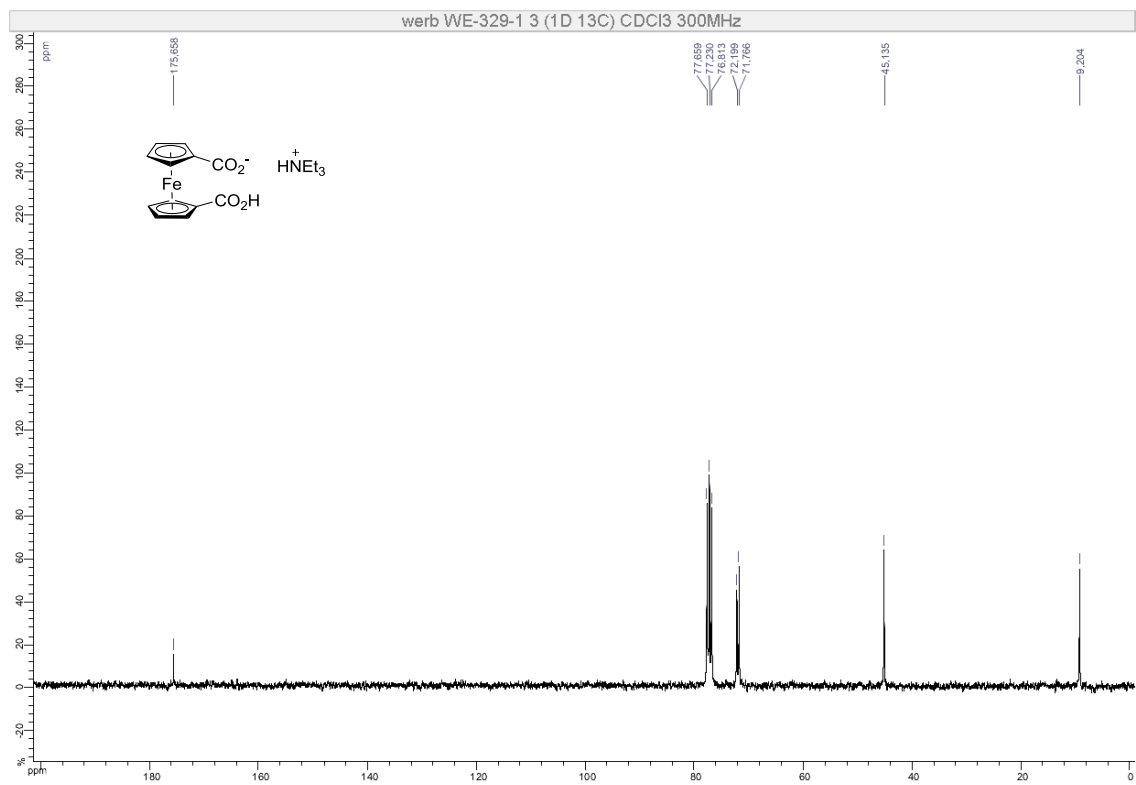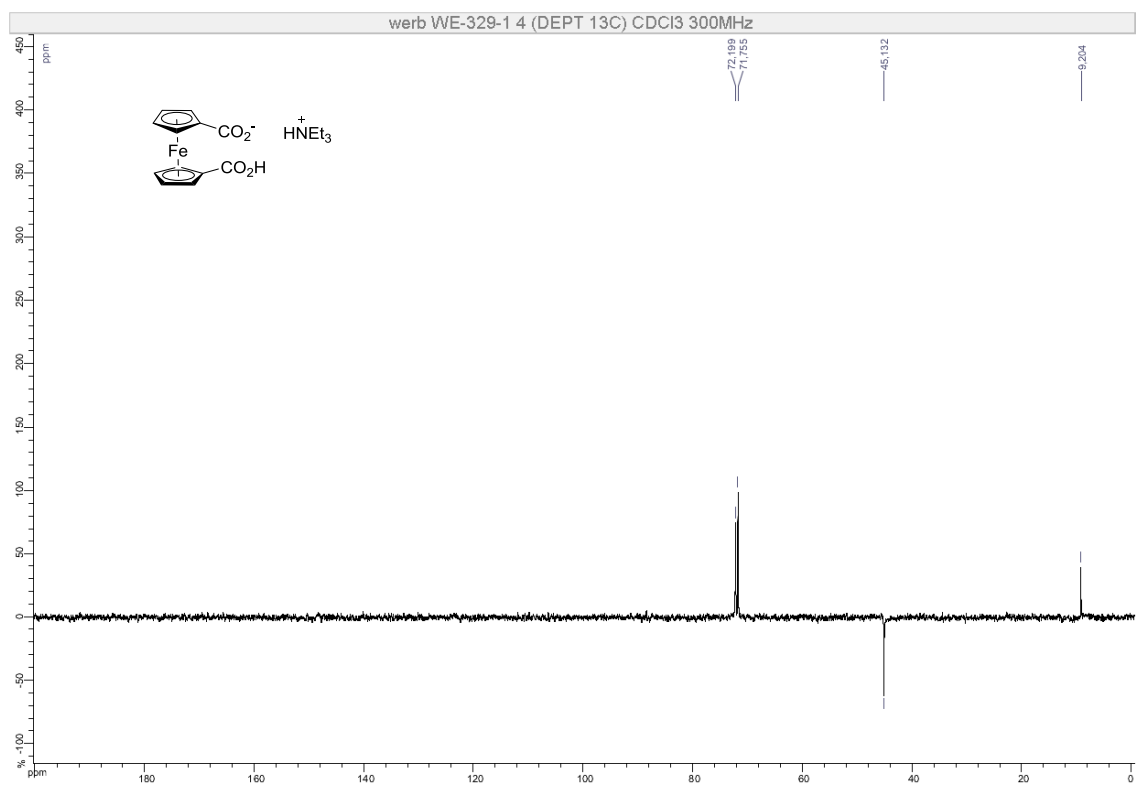



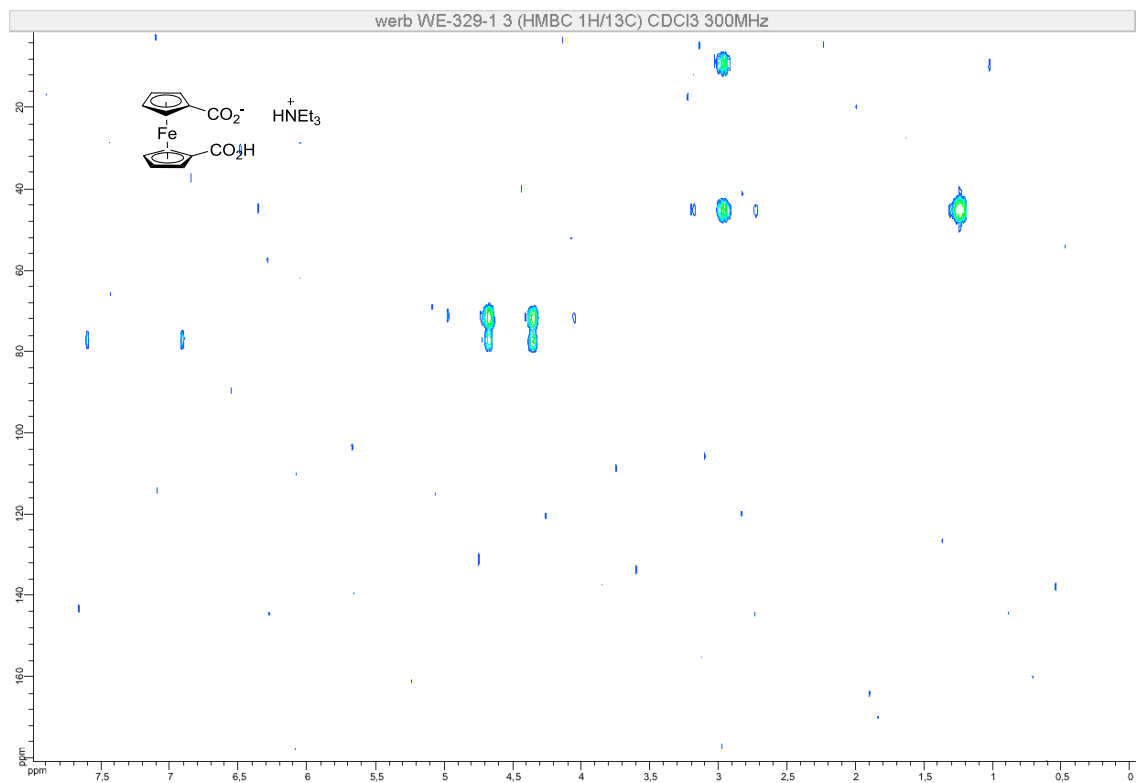

### 1'-((Benzyloxycarbonyl)amino)ferrocene-1-carboxylic acid - 7

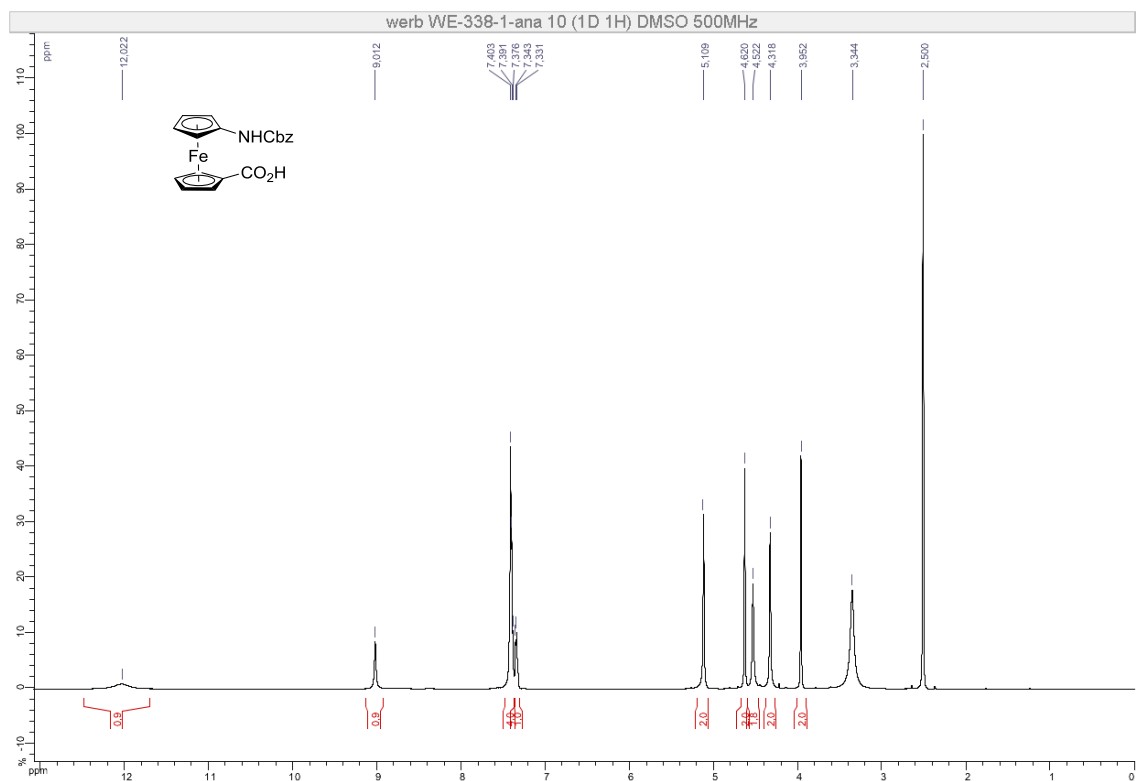

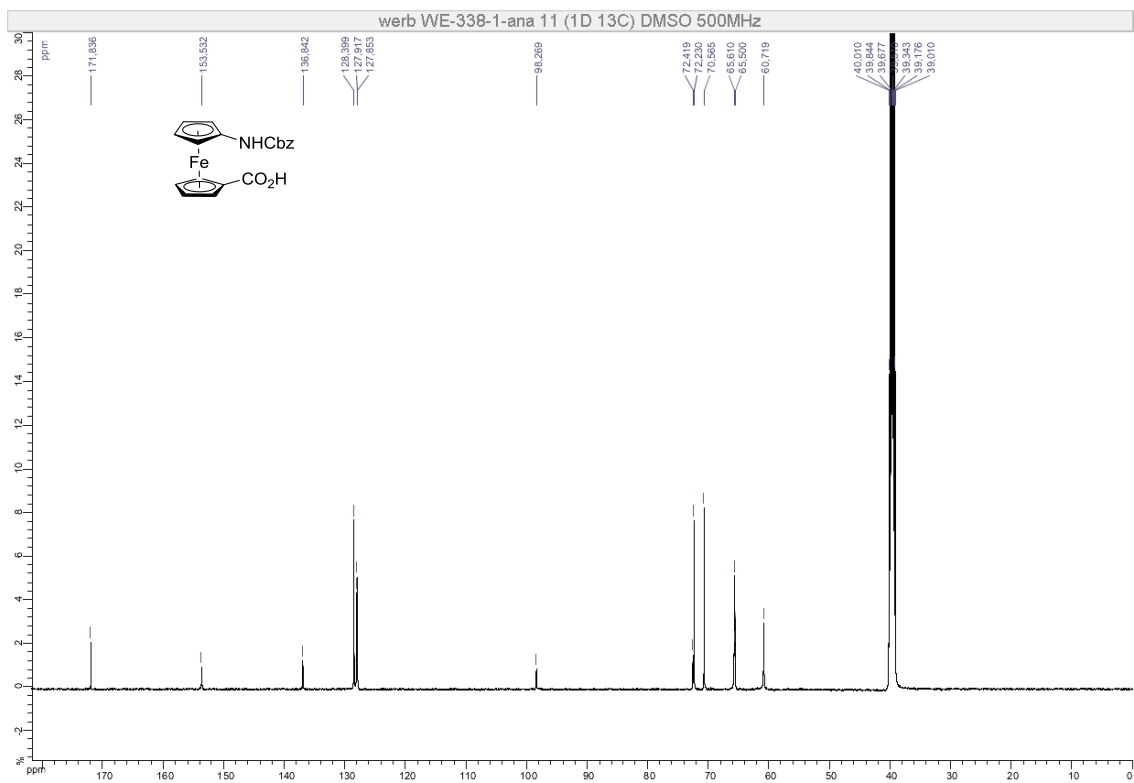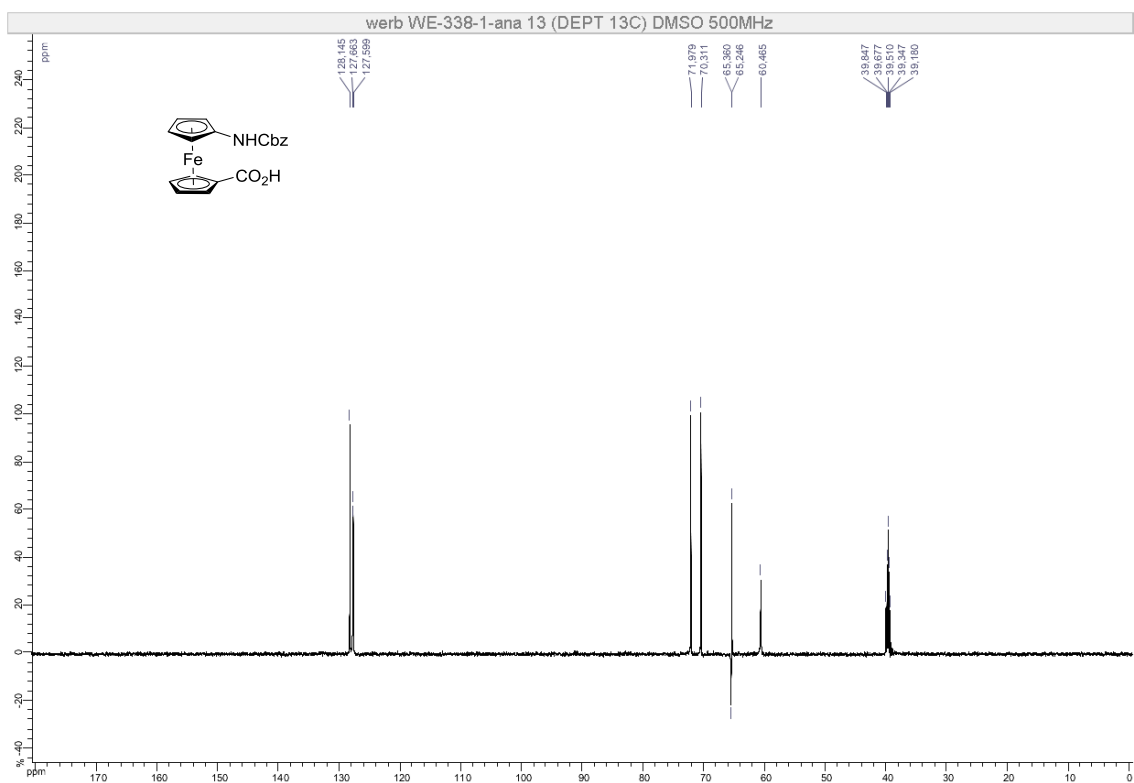

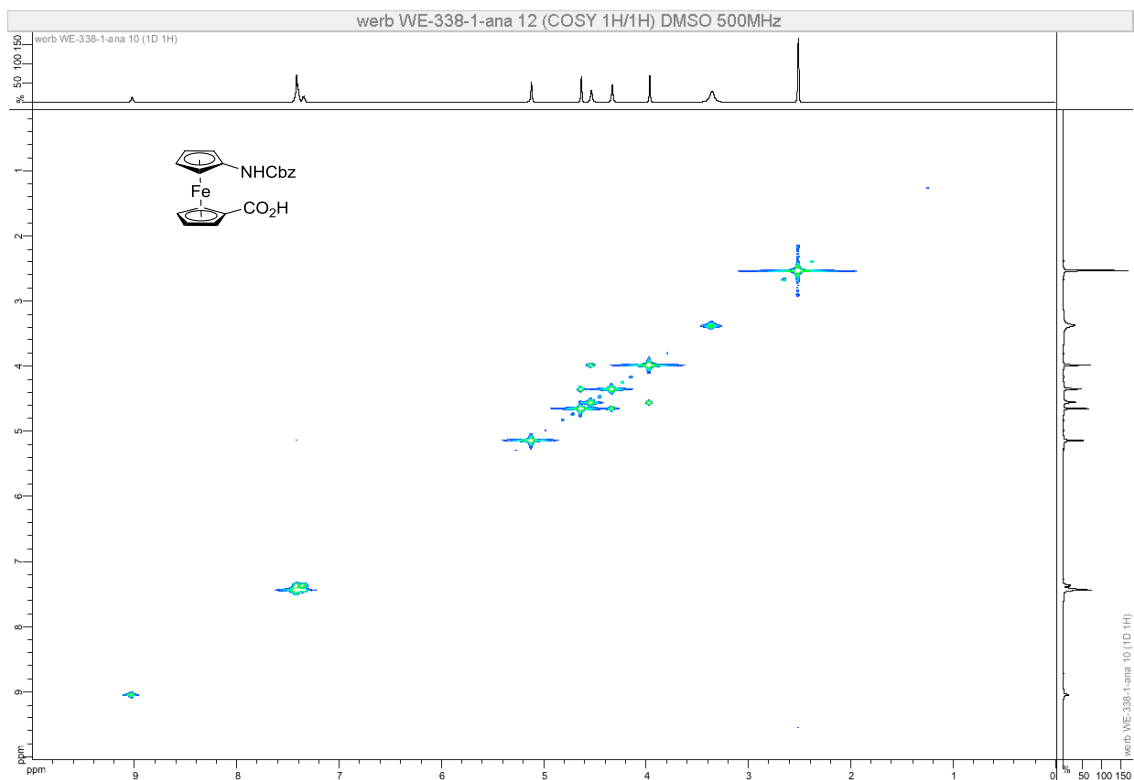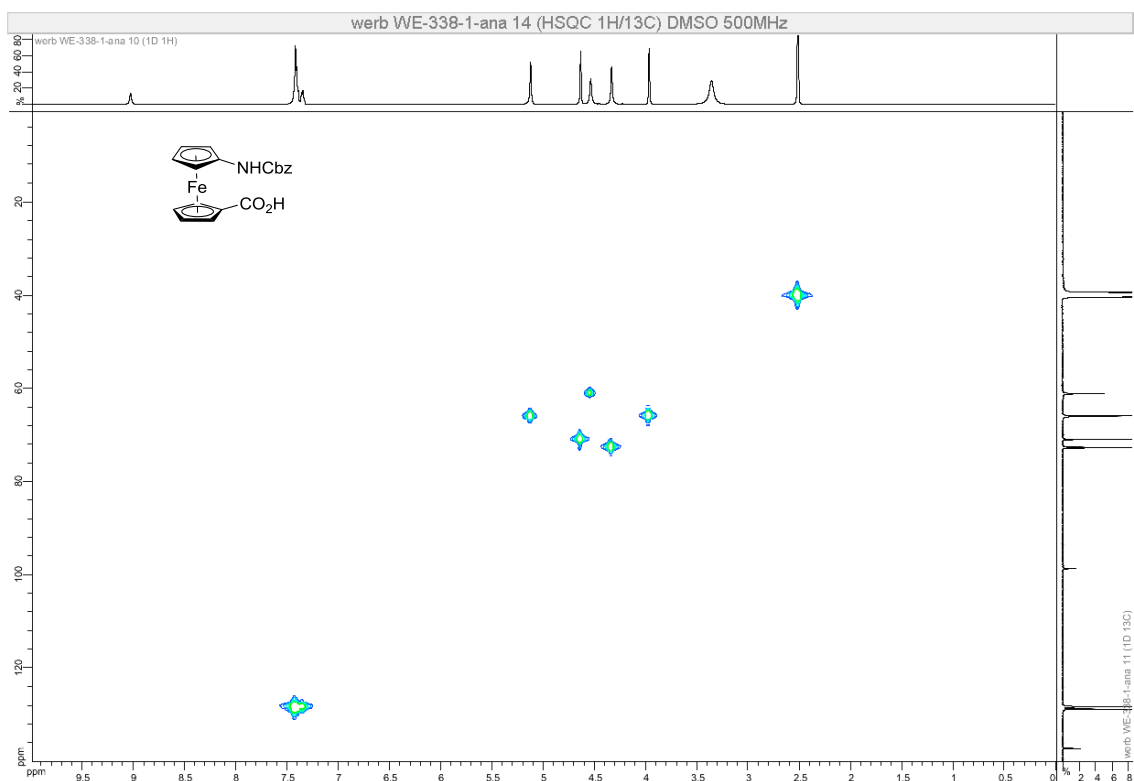

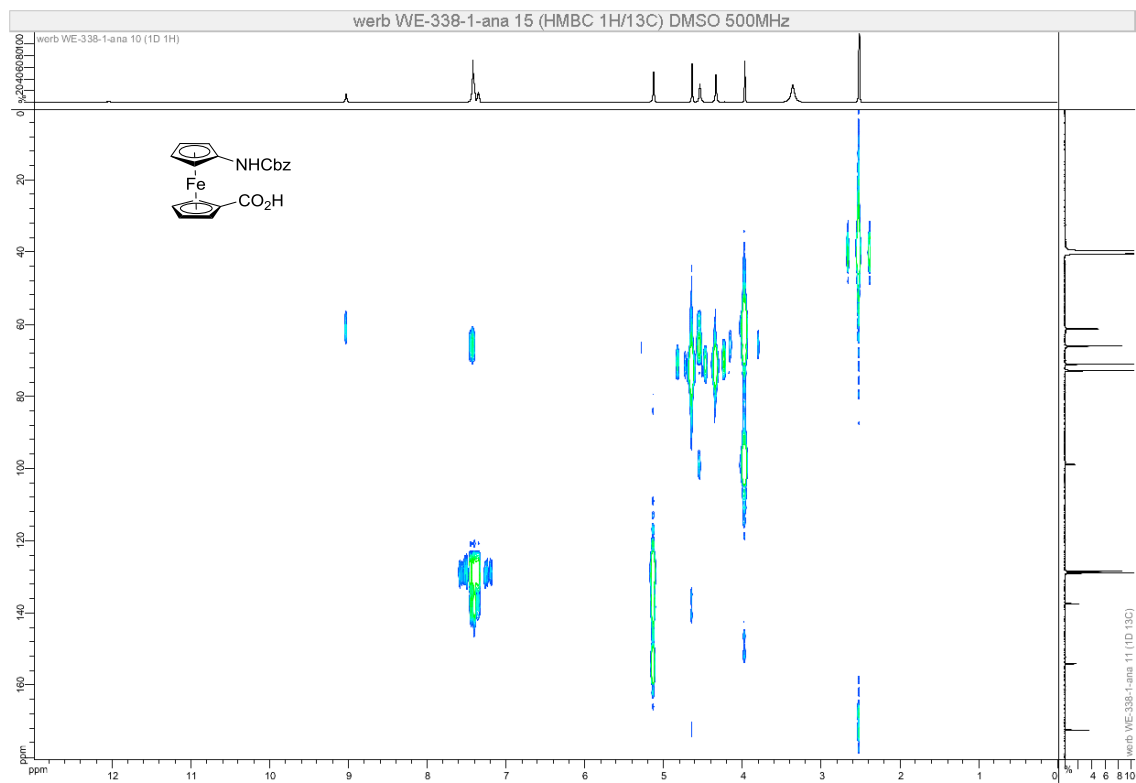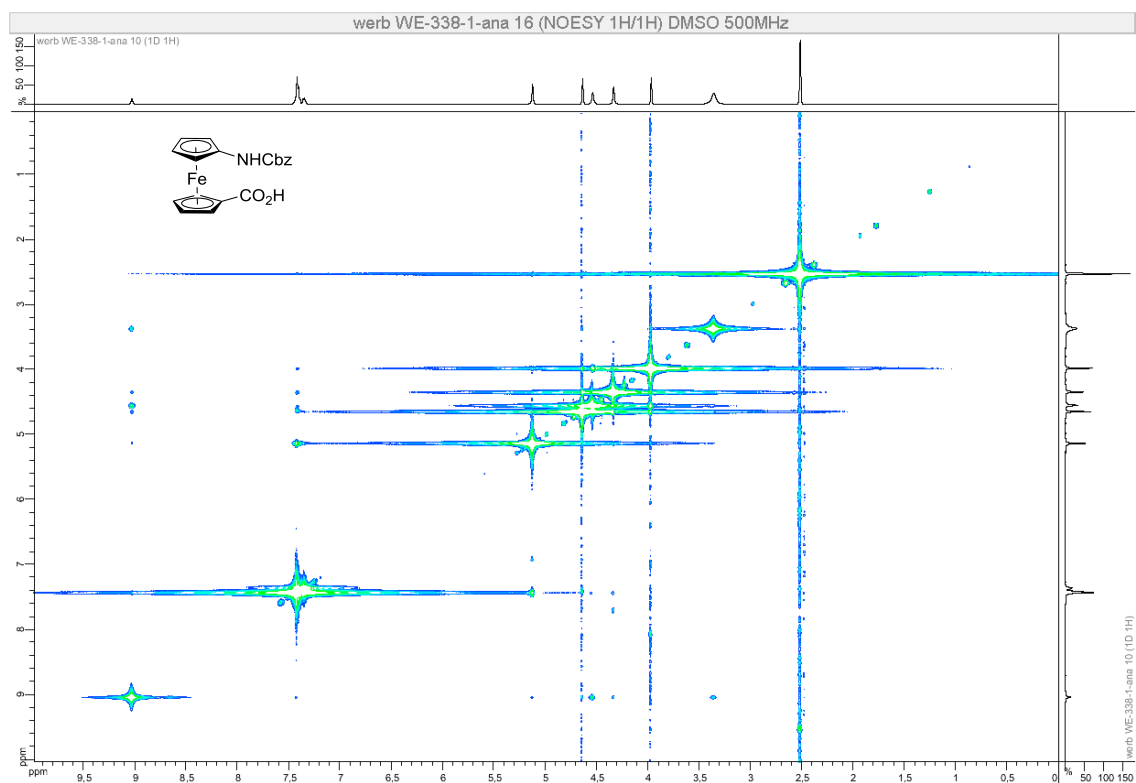

**1'-[(Fluoren-9-yl)methoxycarbonyl]amino]ferrocene-1-carboxylic acid - 8**

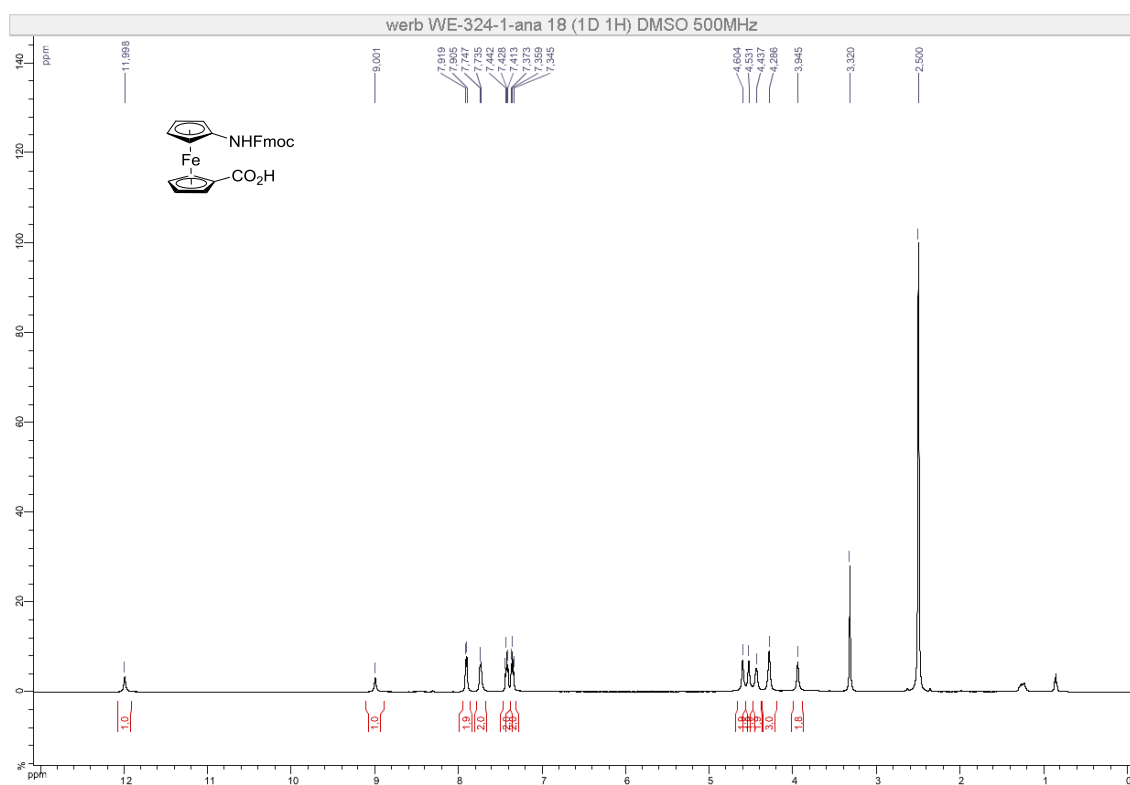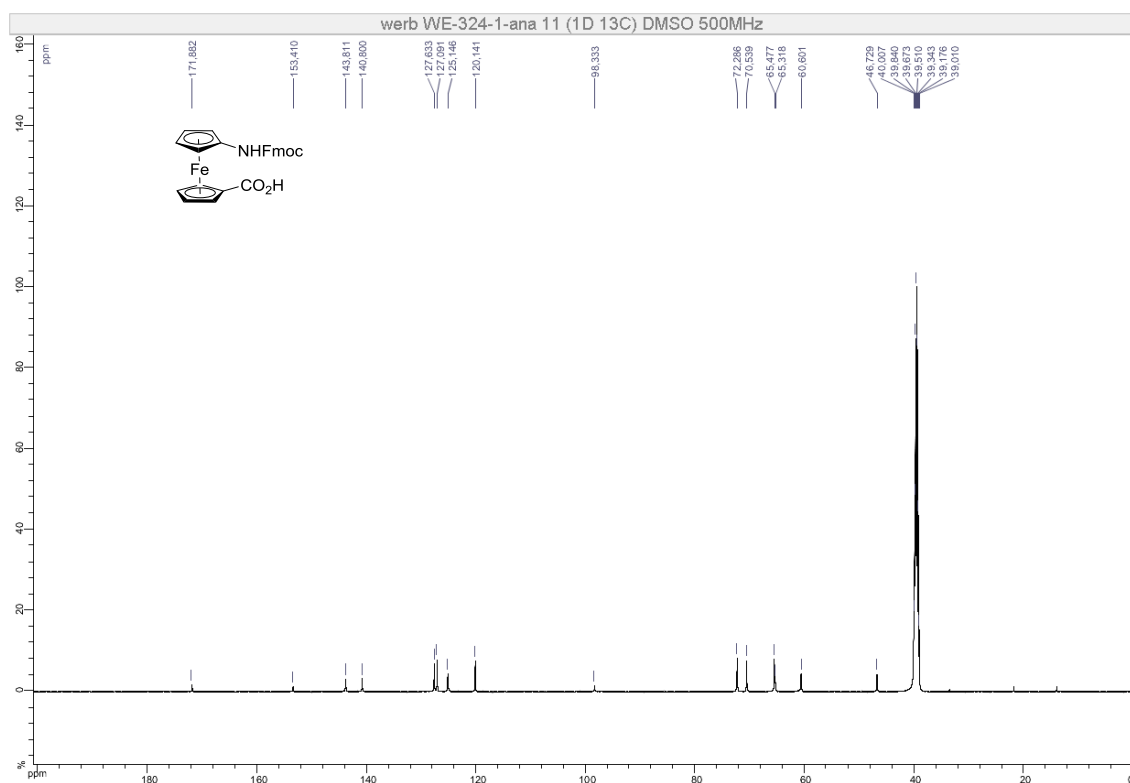

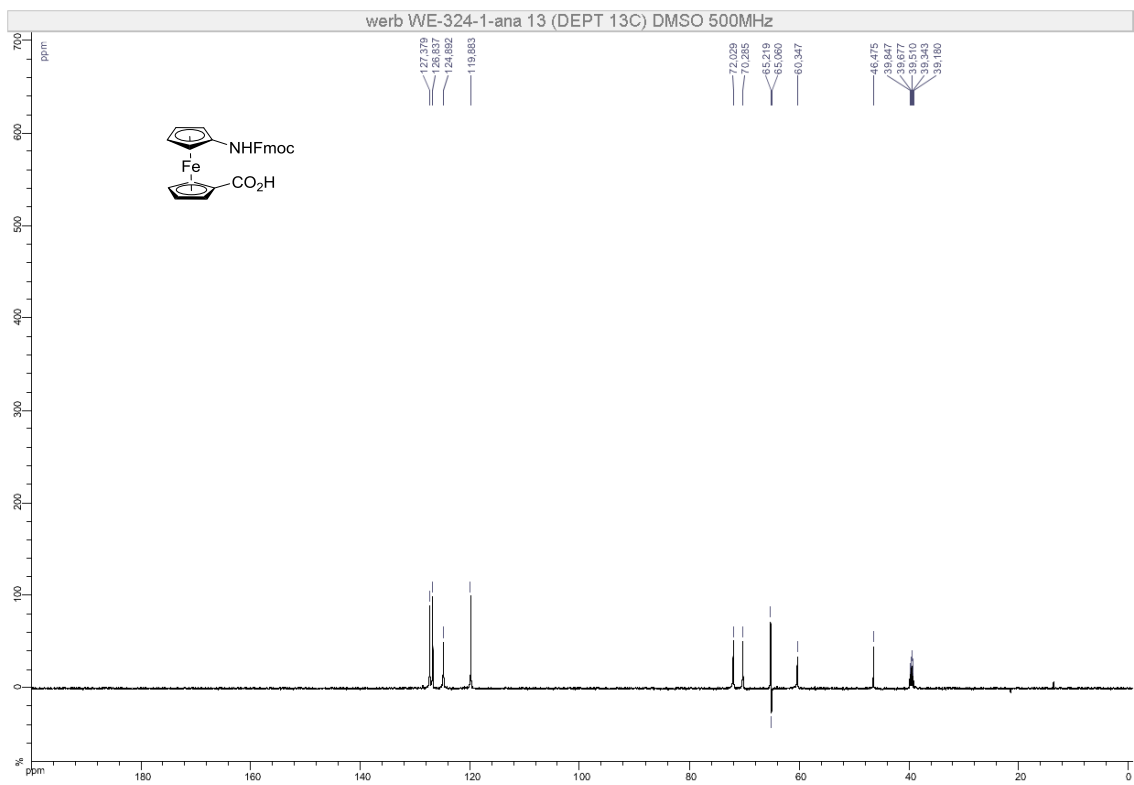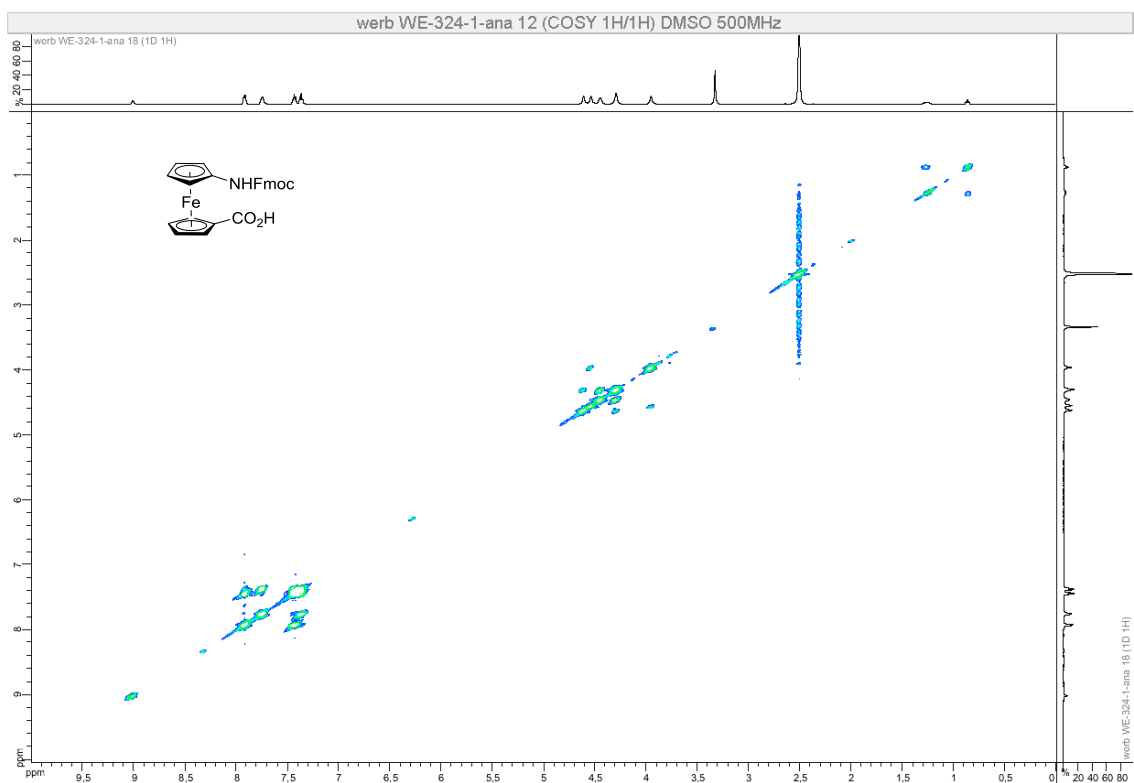

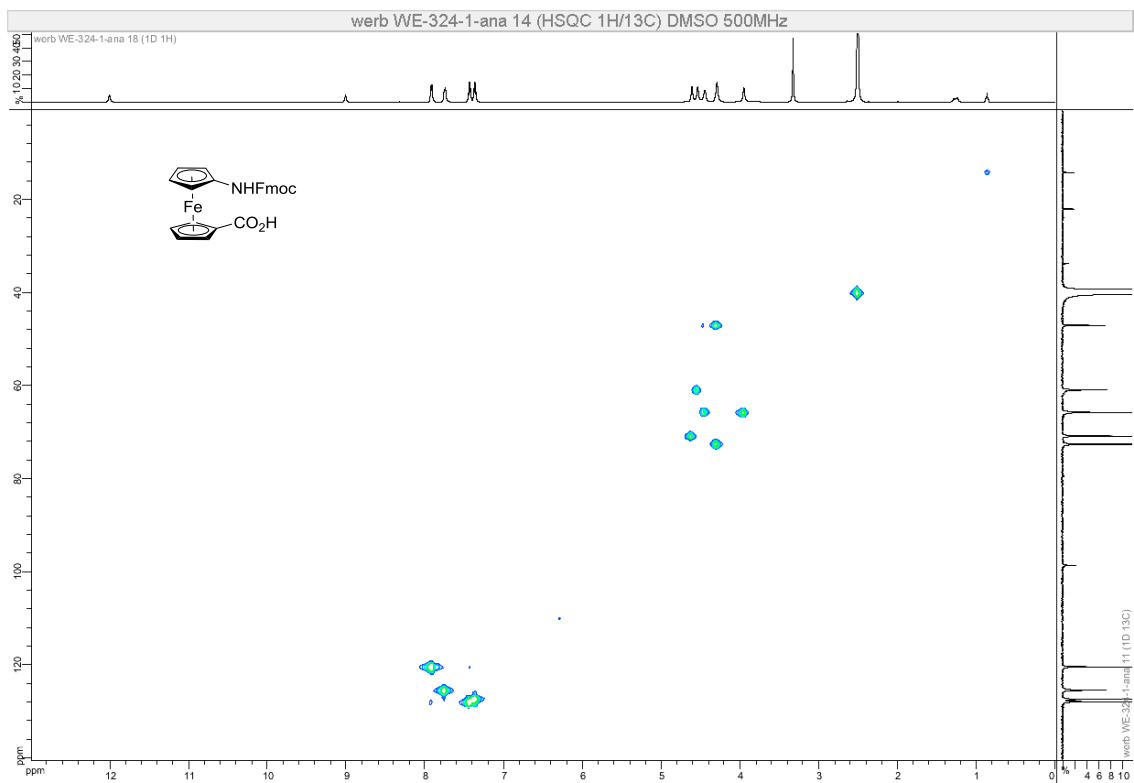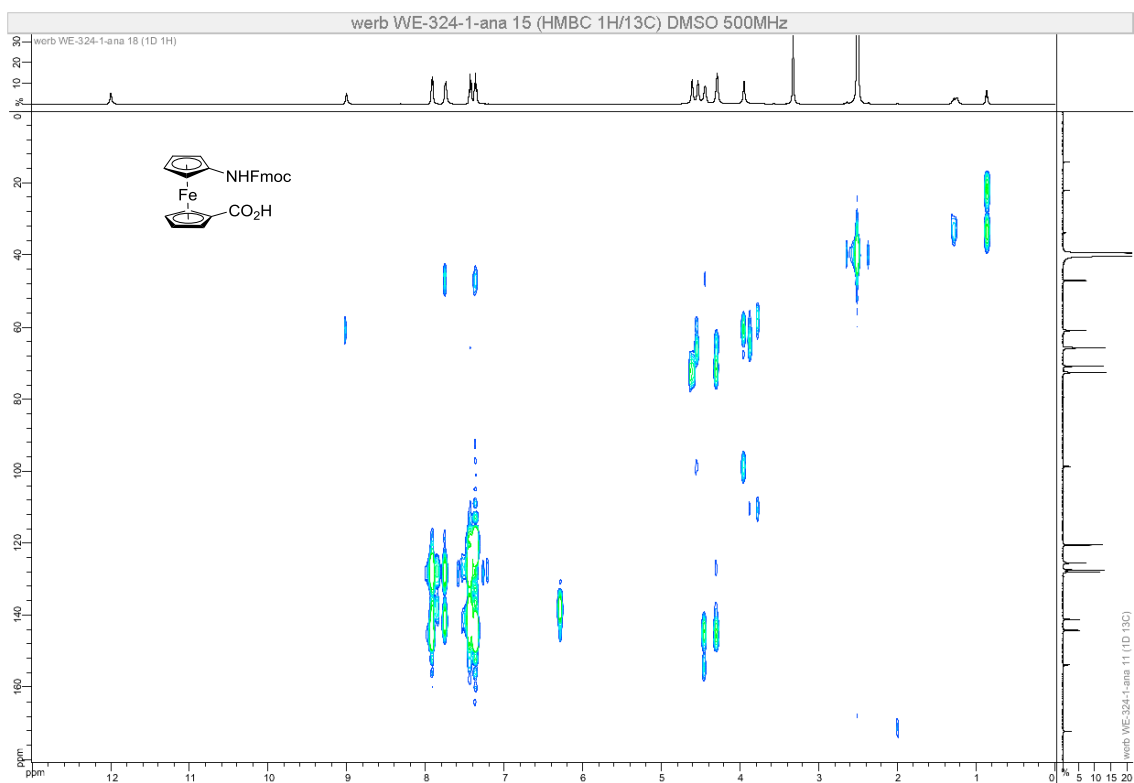

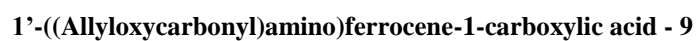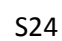



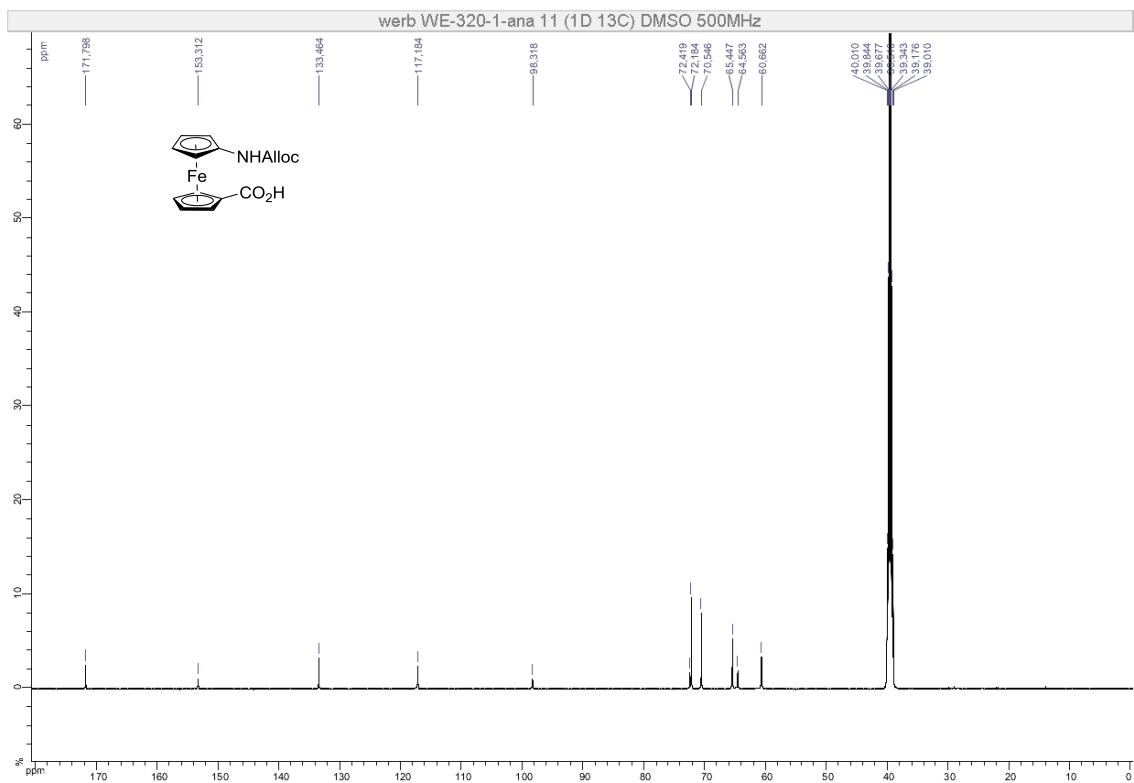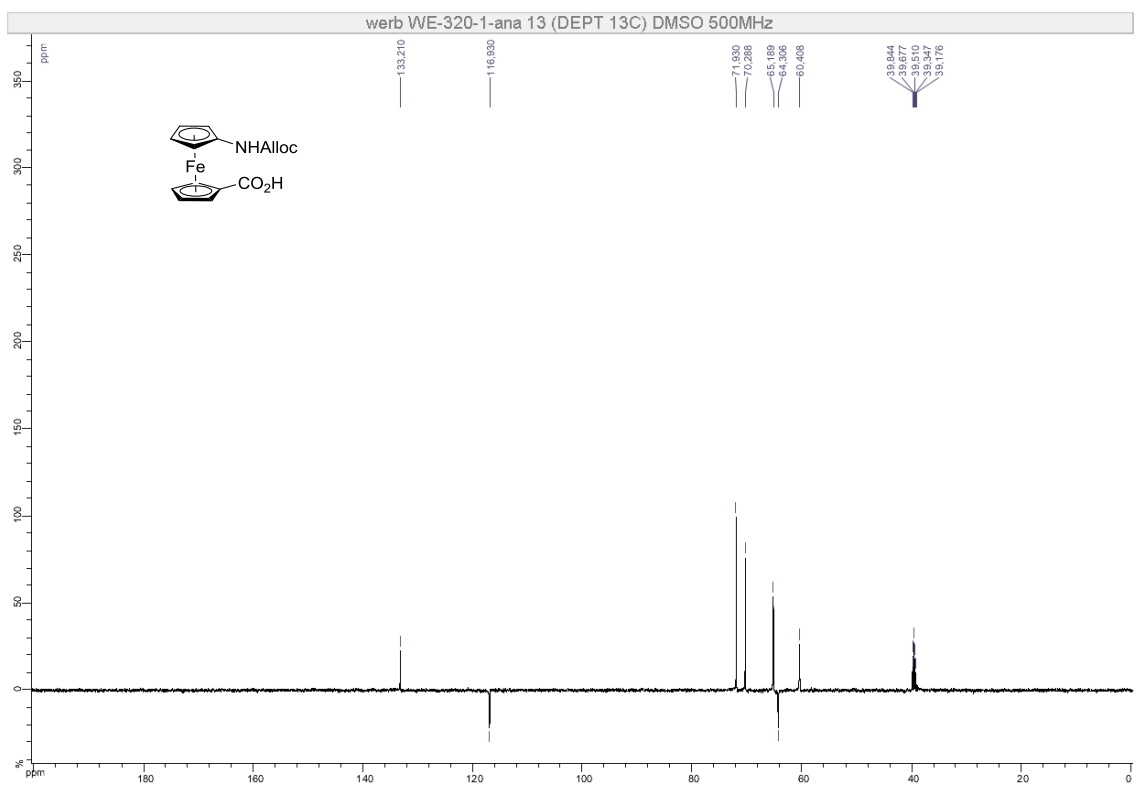





**2,5-Dioxopyrrolidin-1-yl 1'-(*tert*-butylcarbonylamino)ferrocene-1-carboxylate - 10**

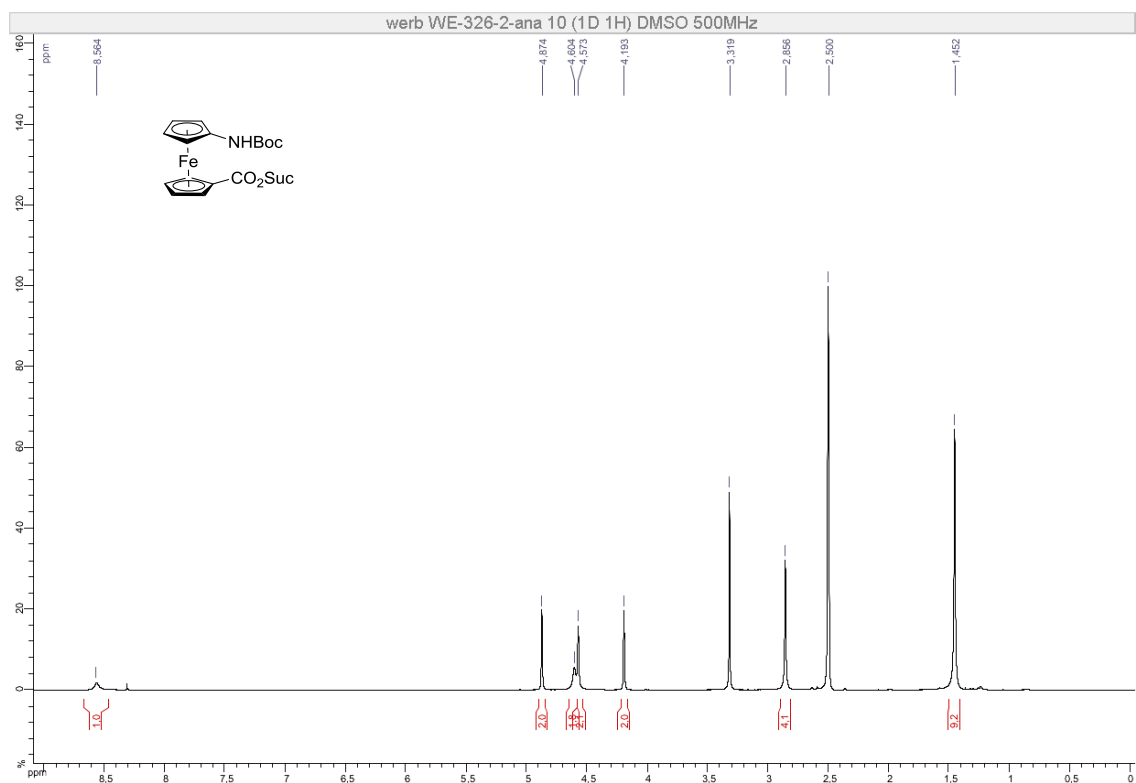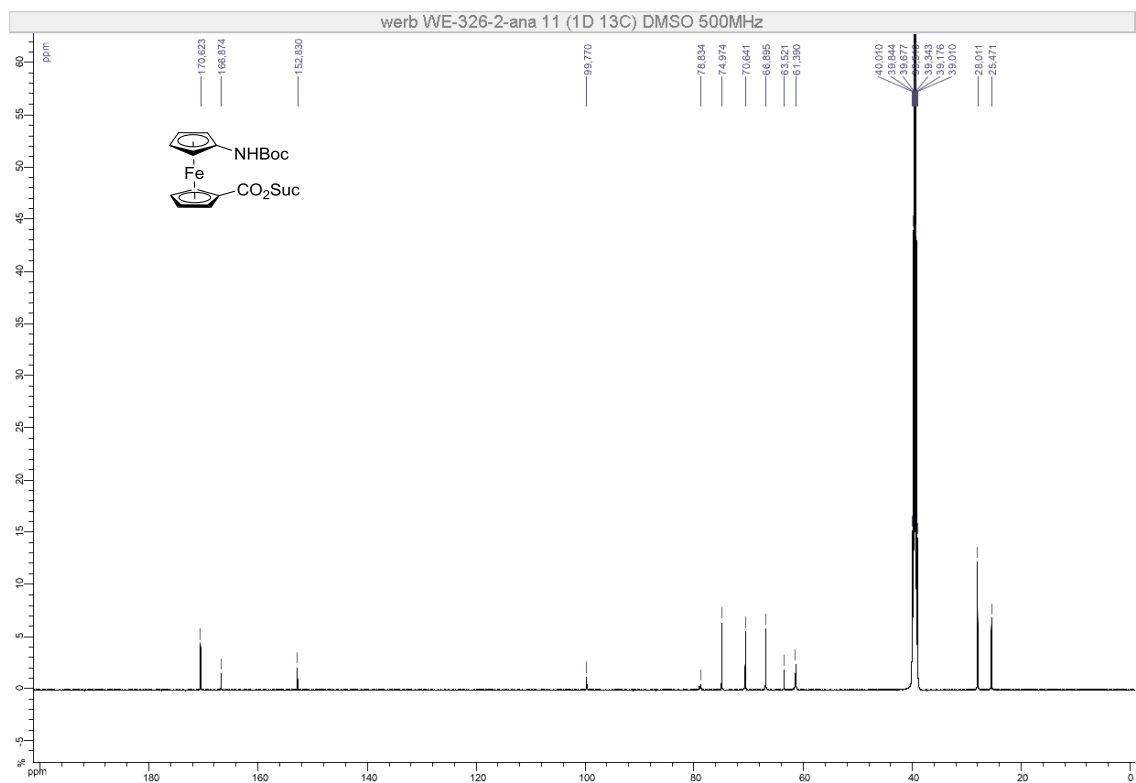

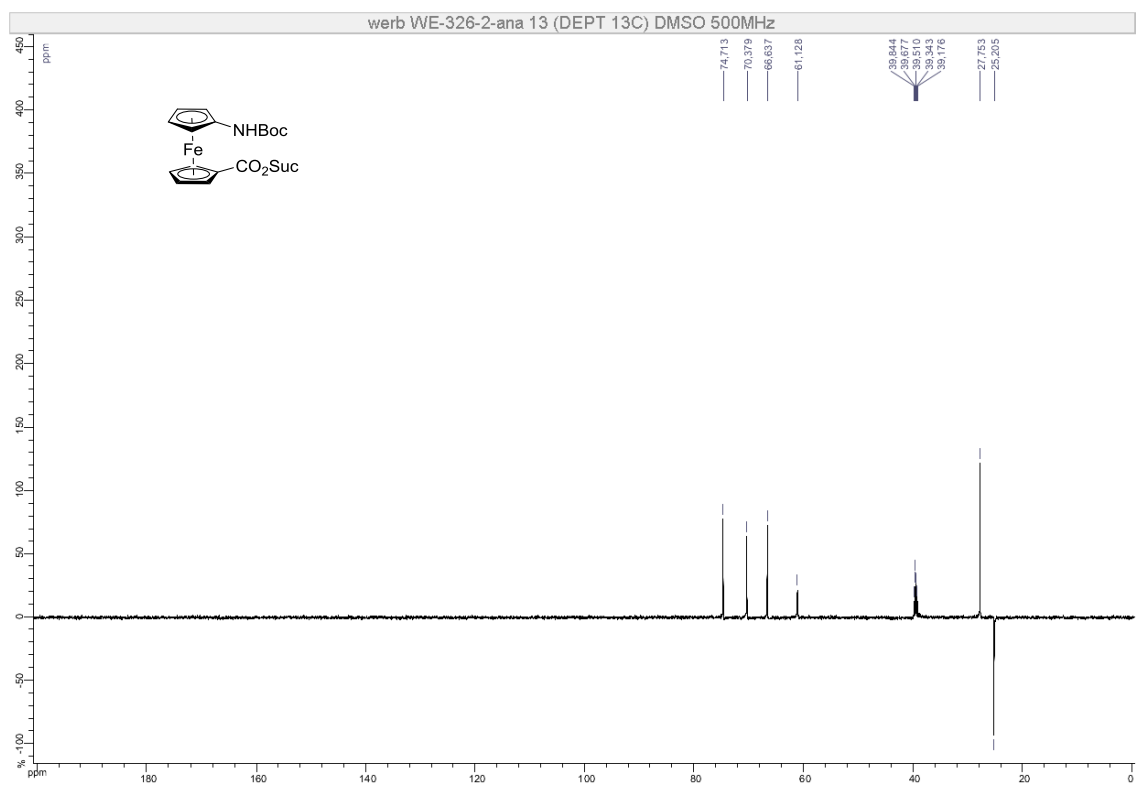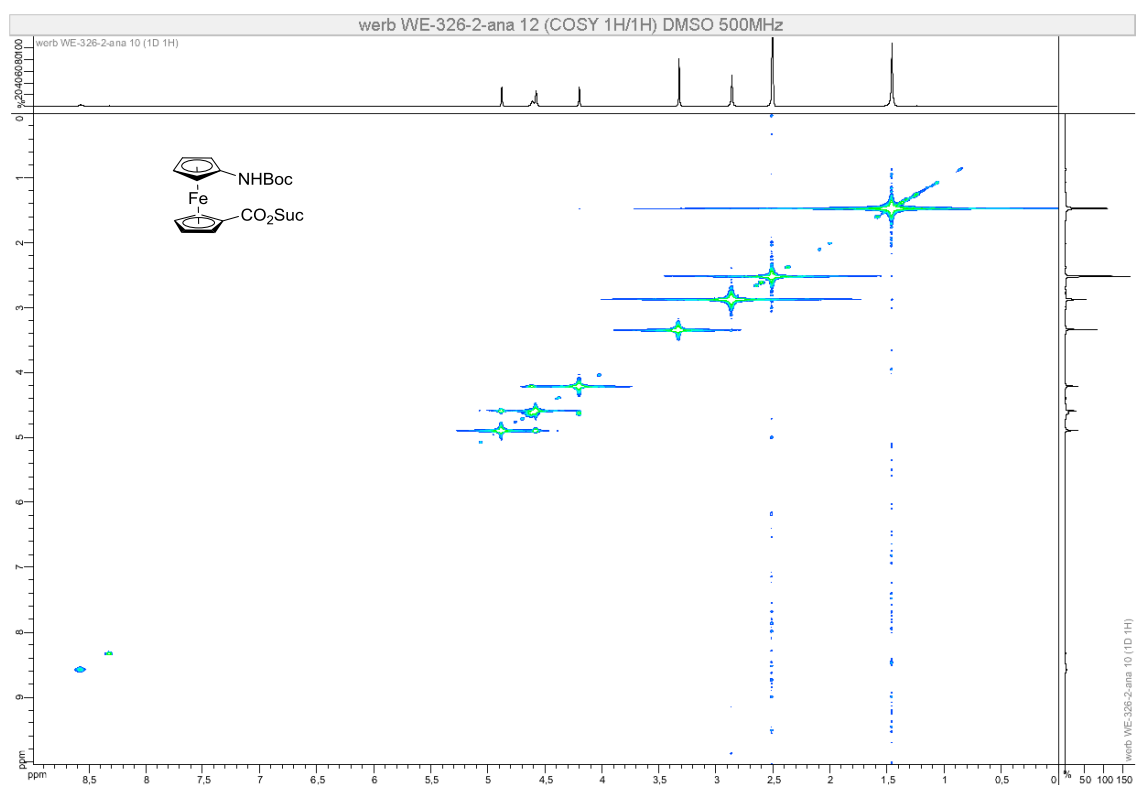

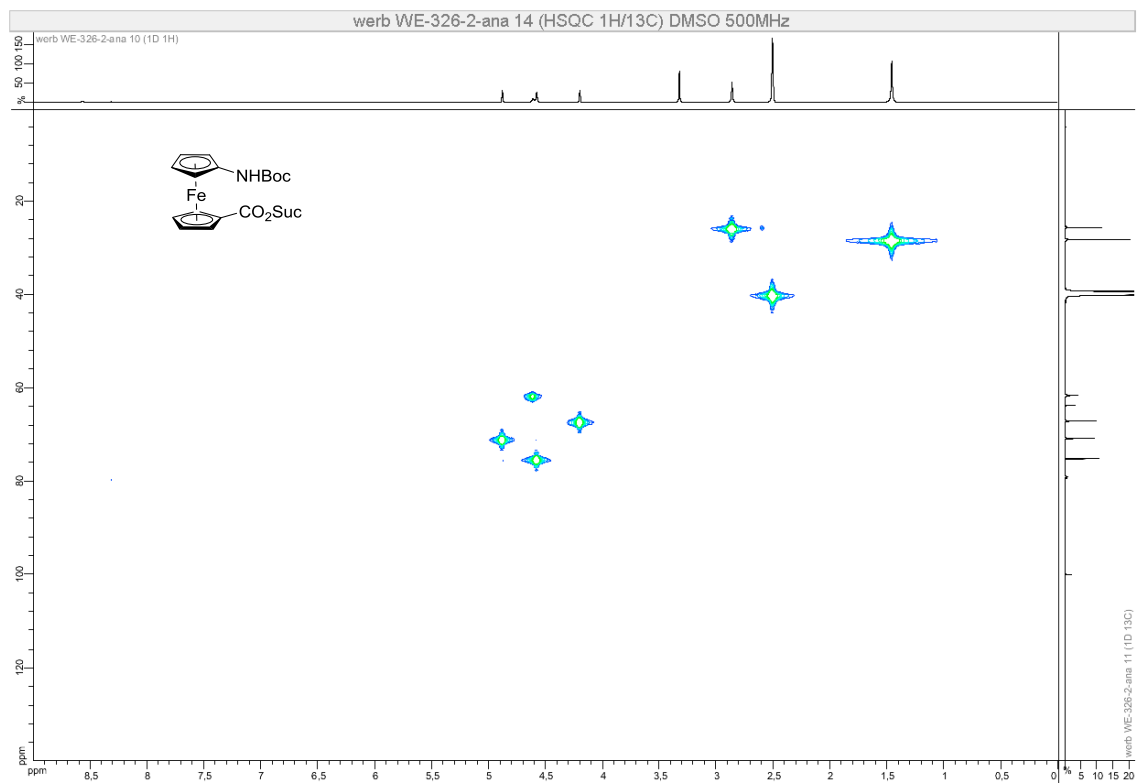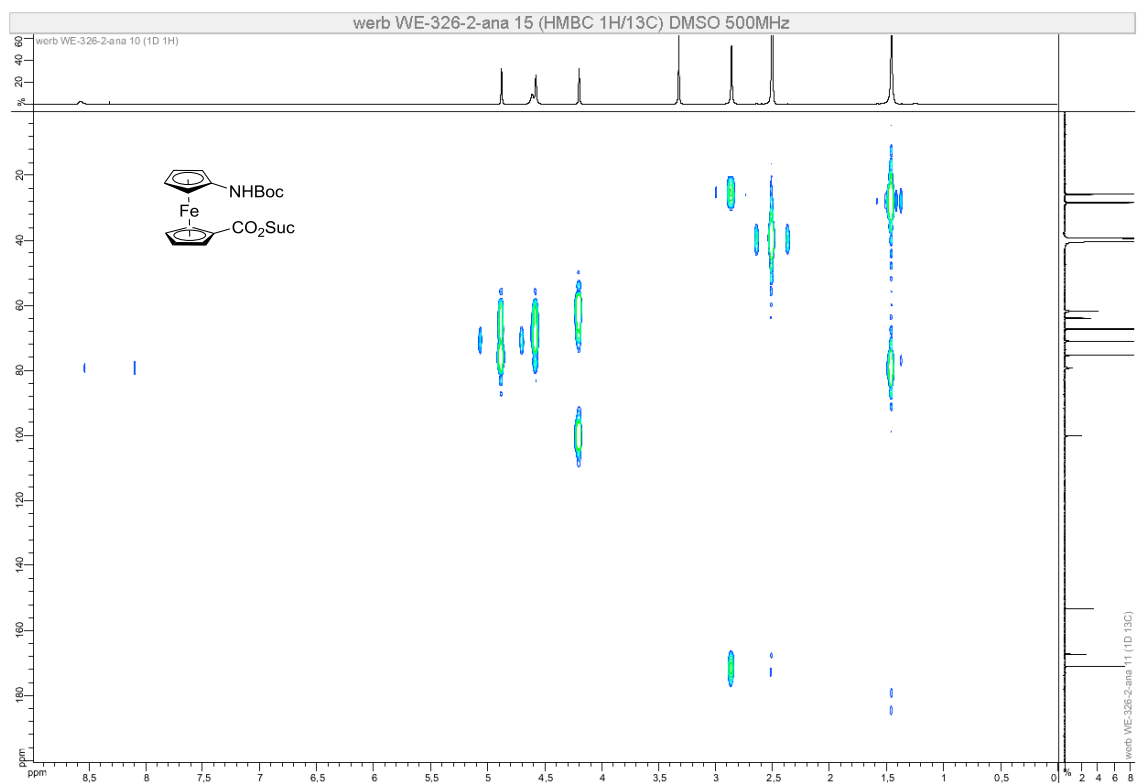

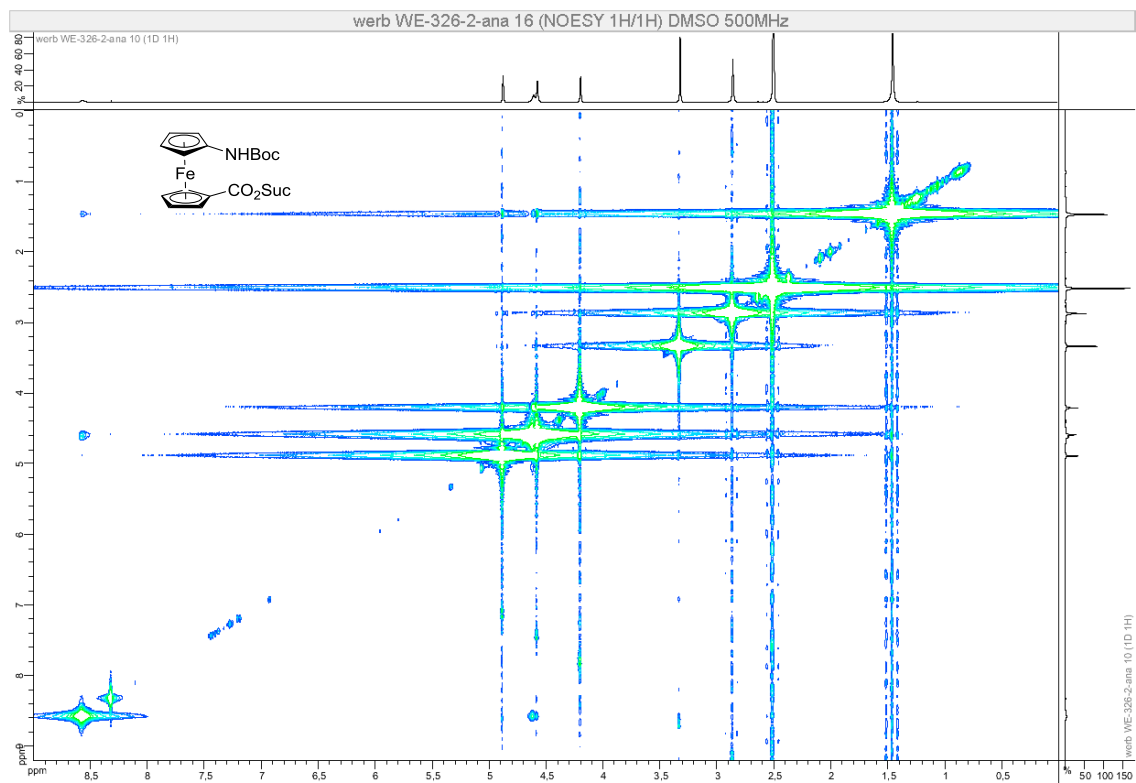

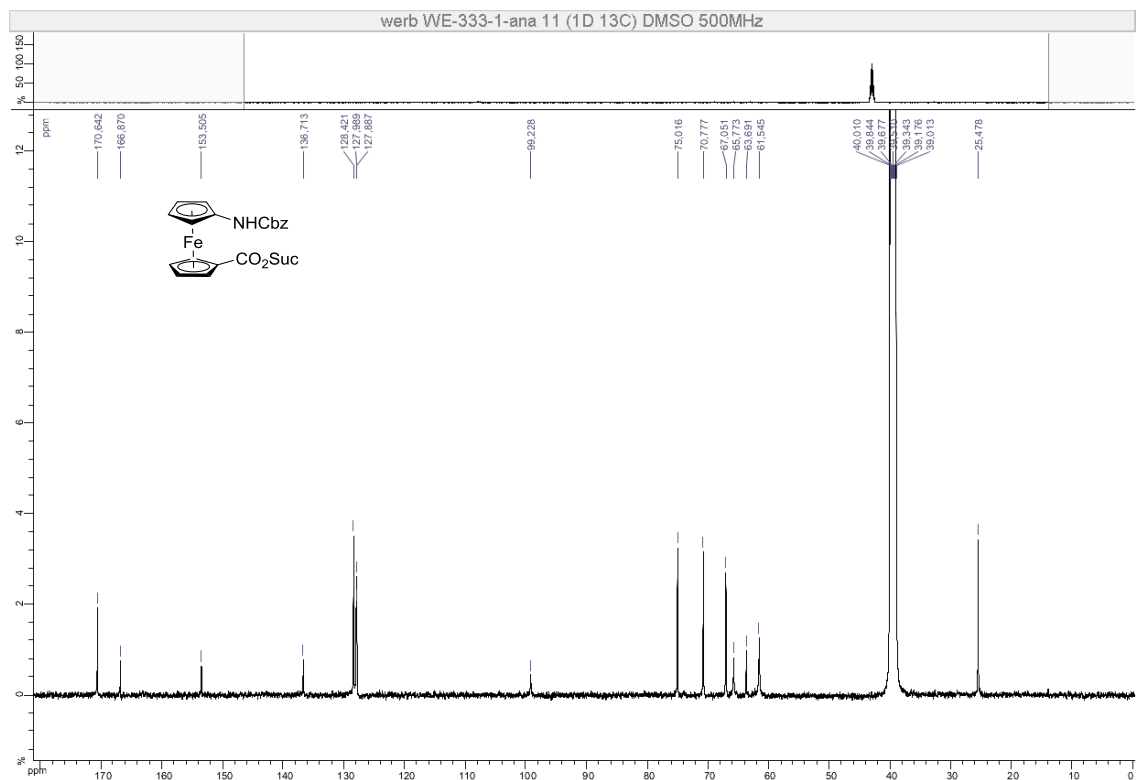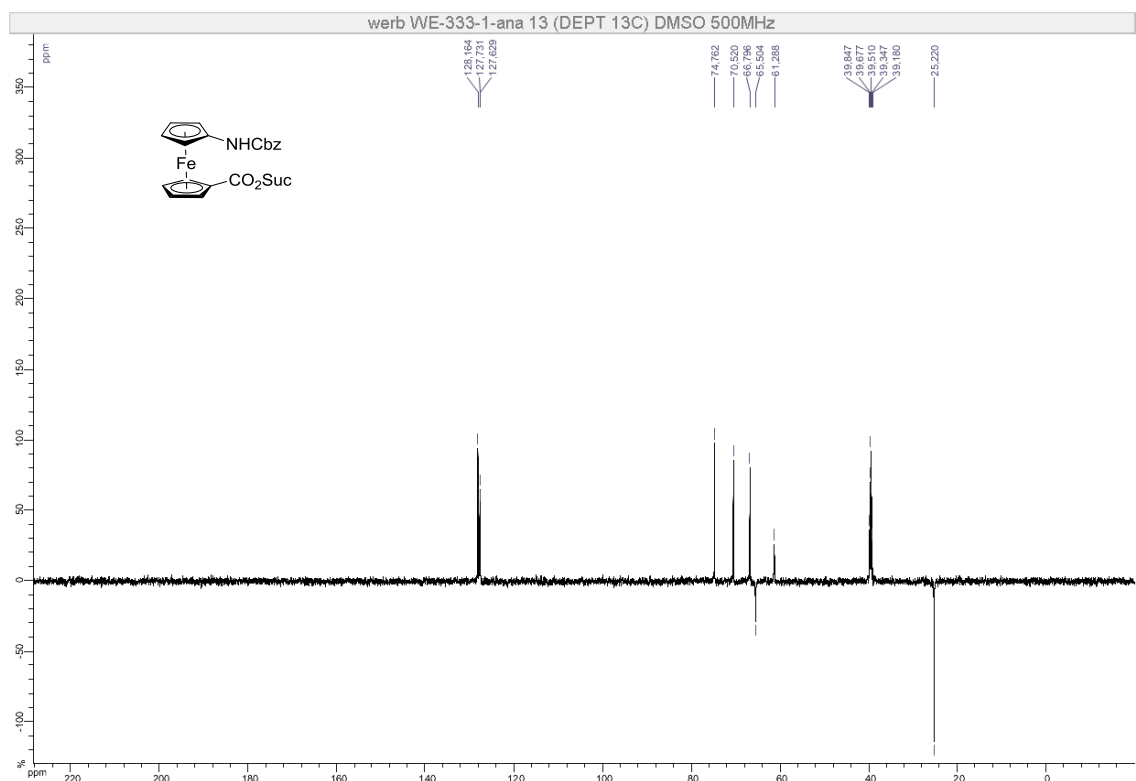



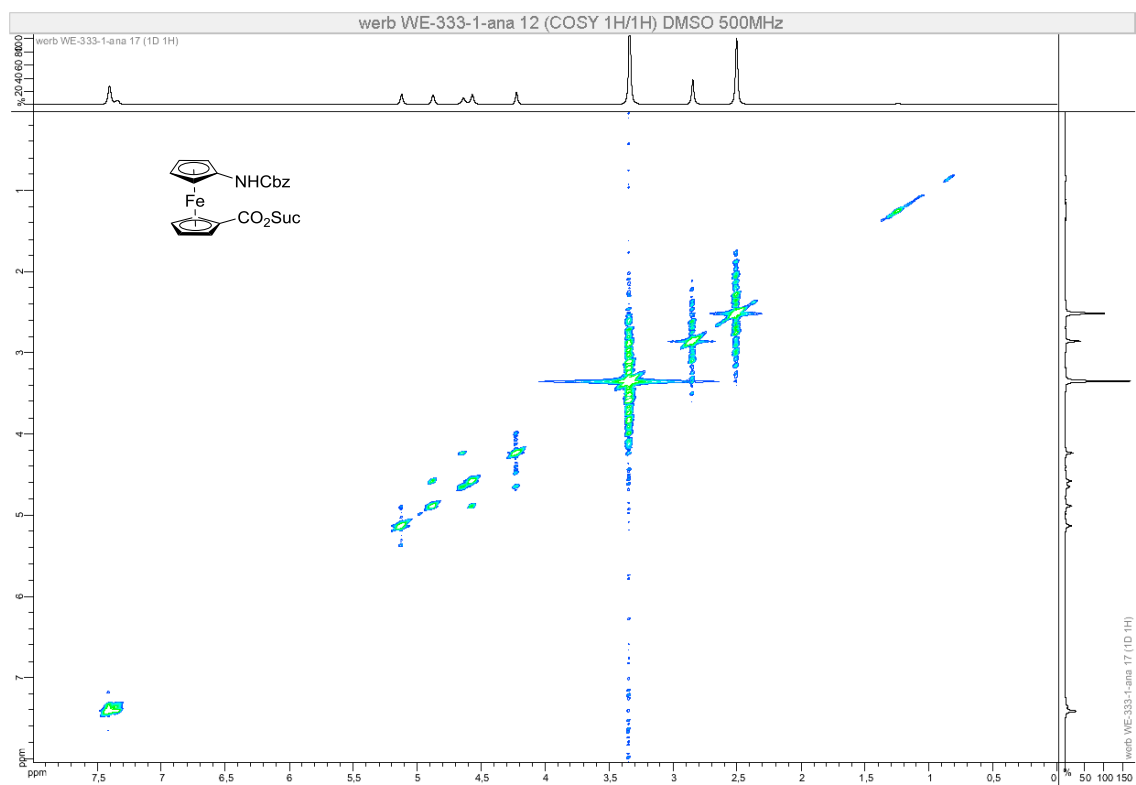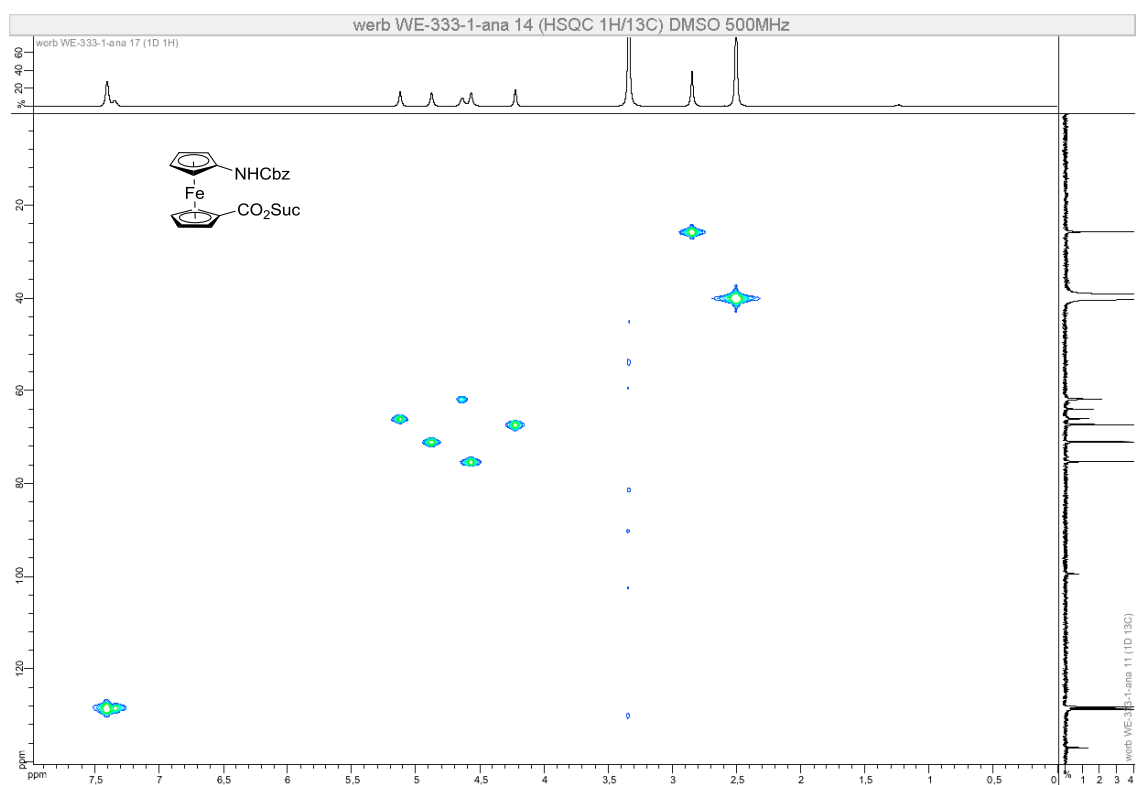

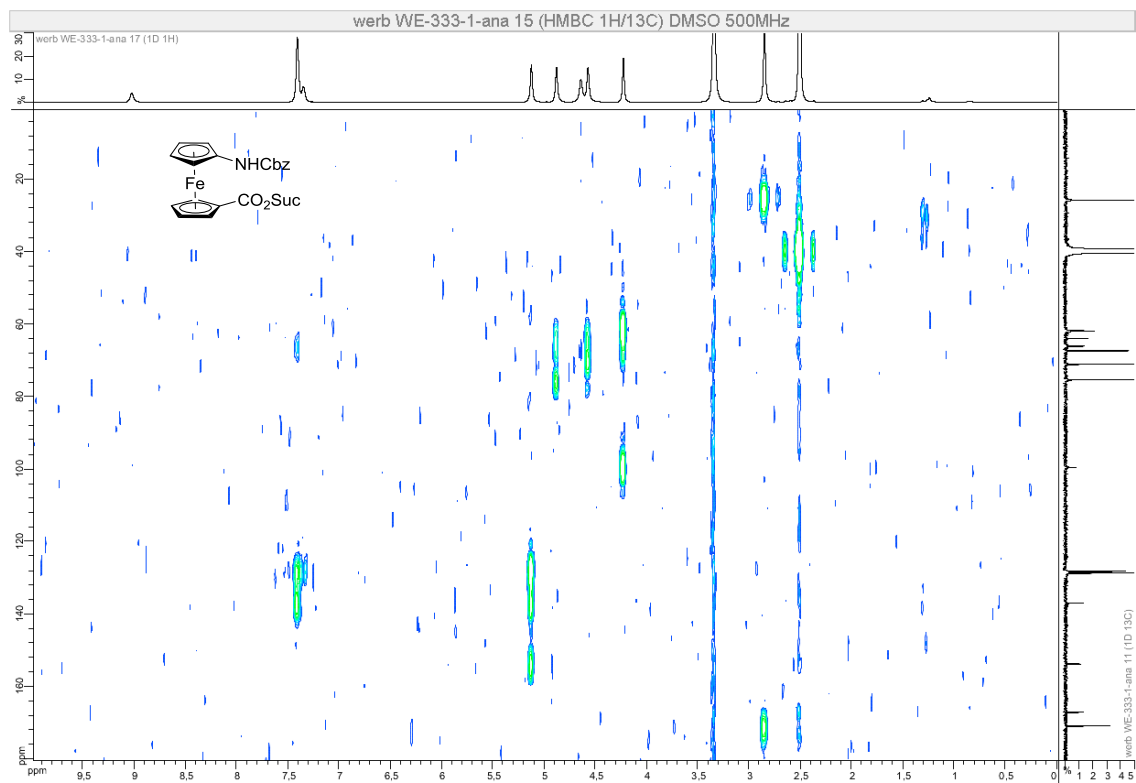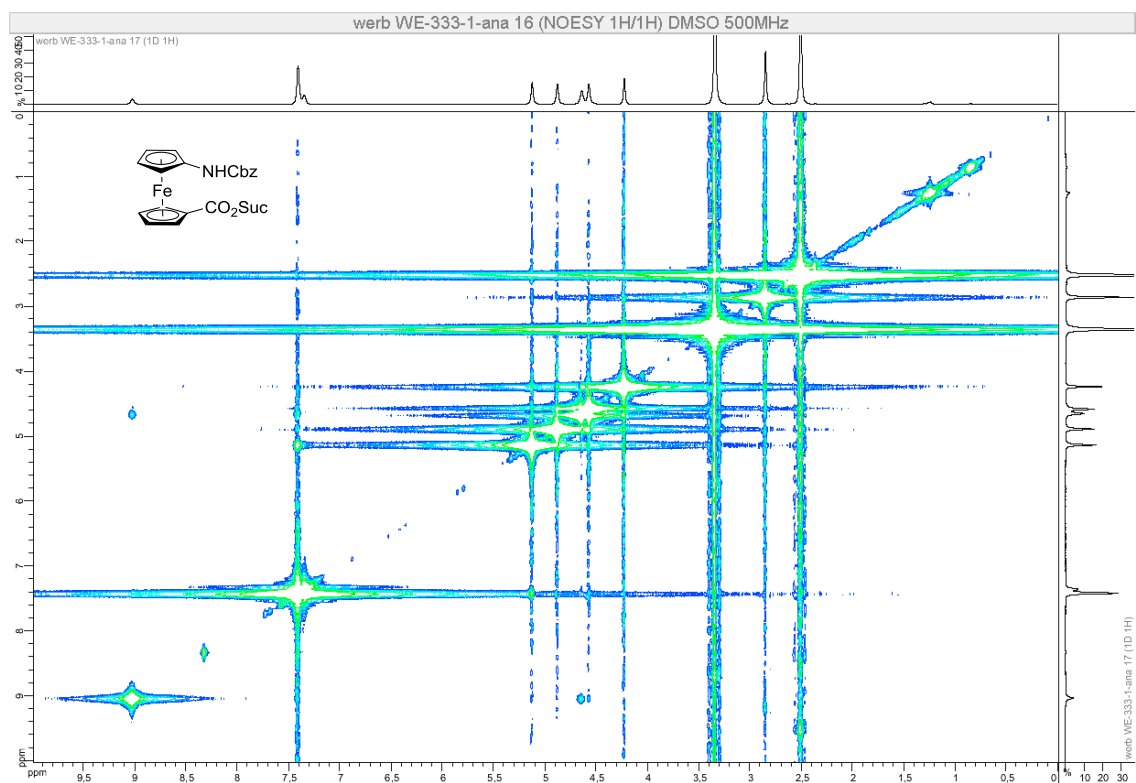

# **2,5-Dioxopyrrolidin-1-yl 1'-[((fluoren-9-yl)methoxycarbonyl)amino]ferrocene-1-carboxylate - 12**

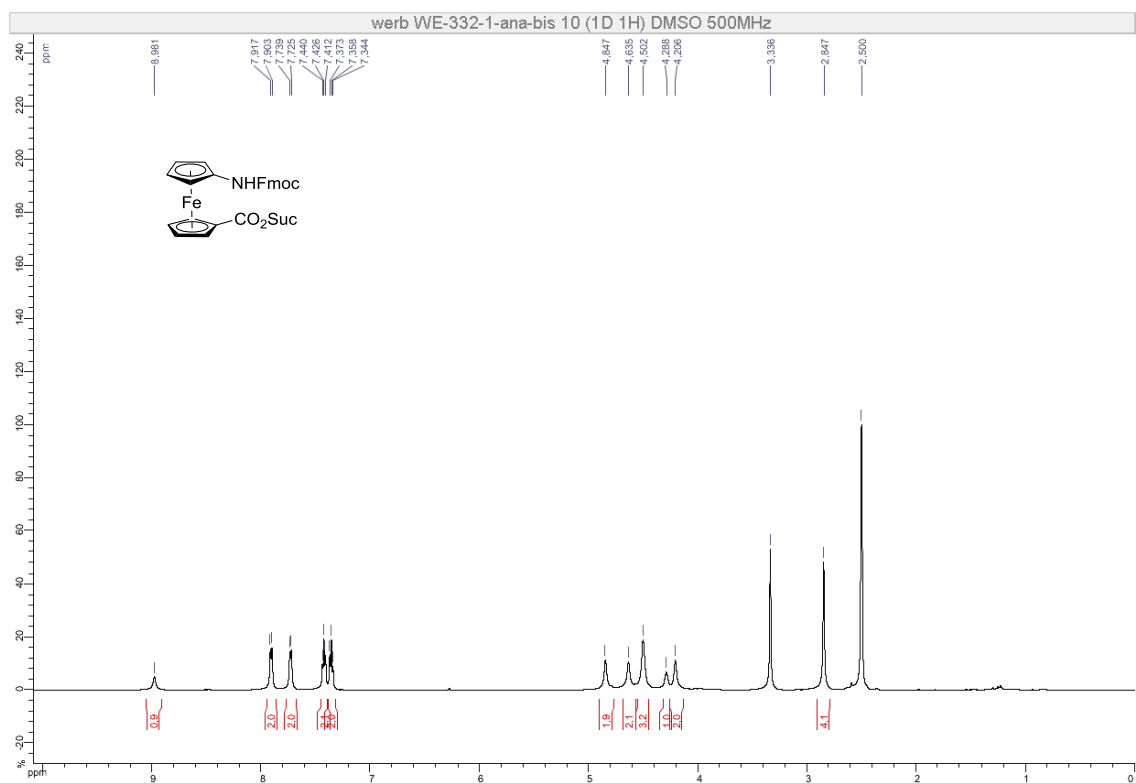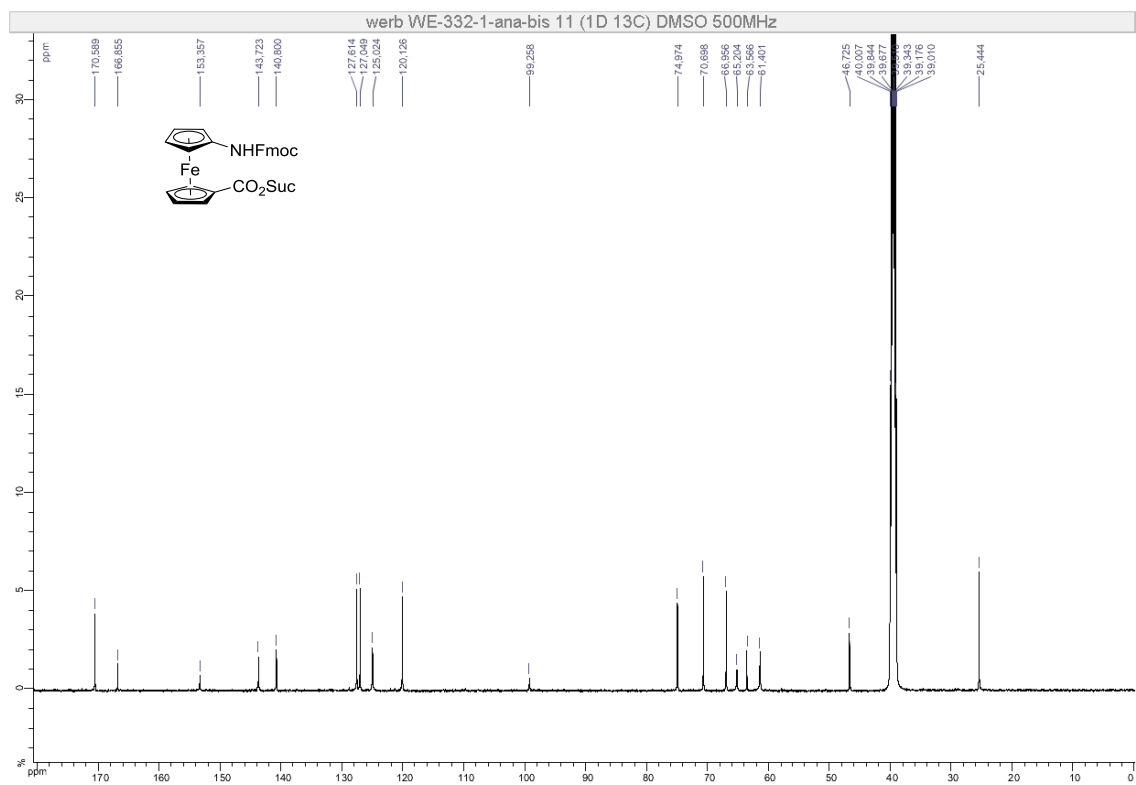

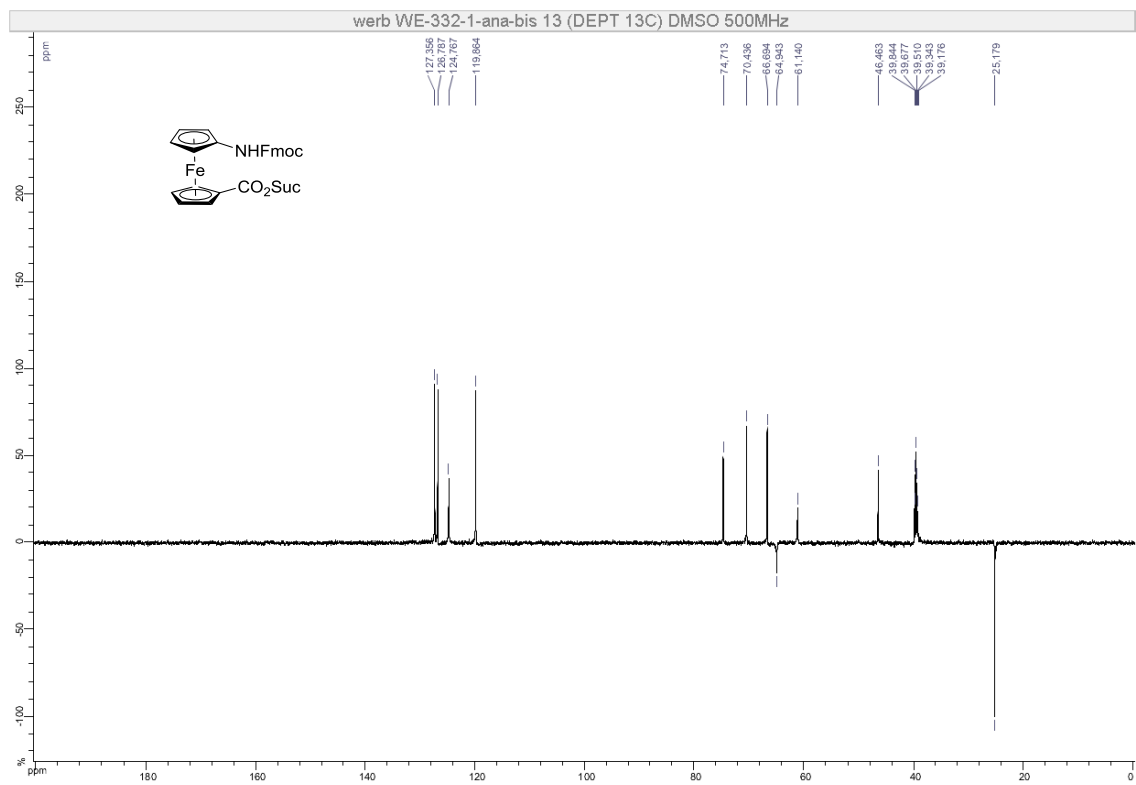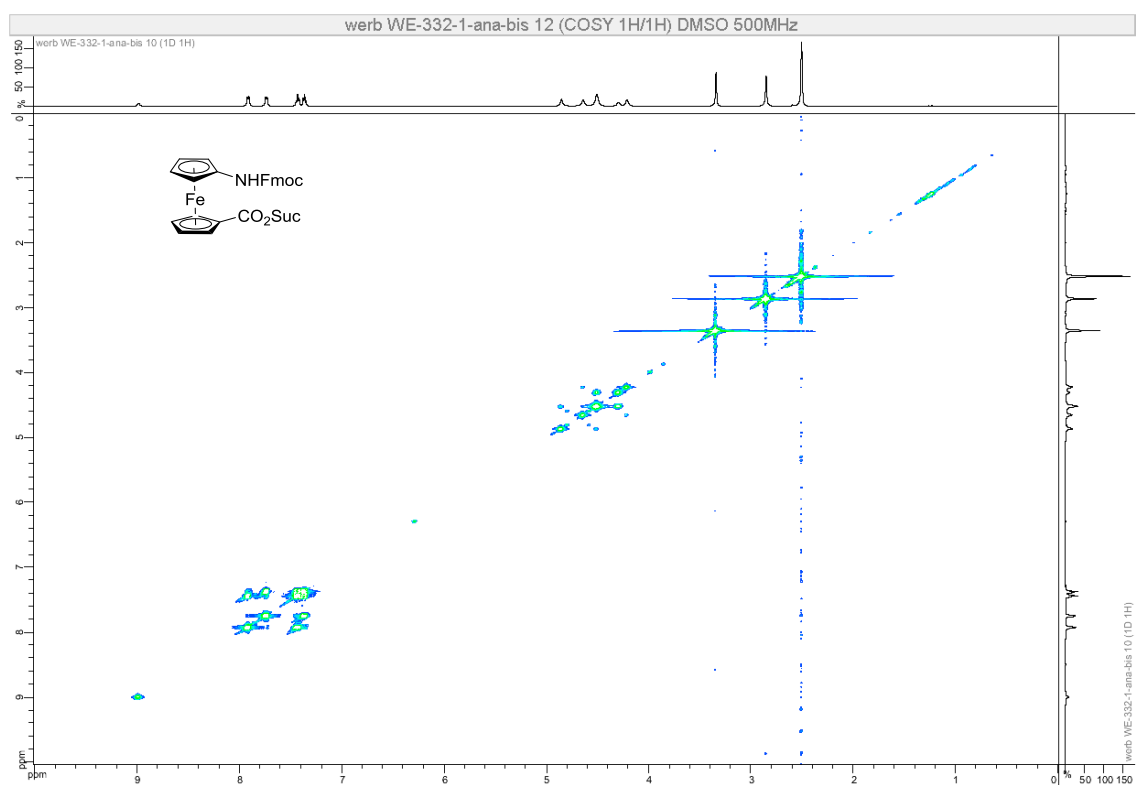

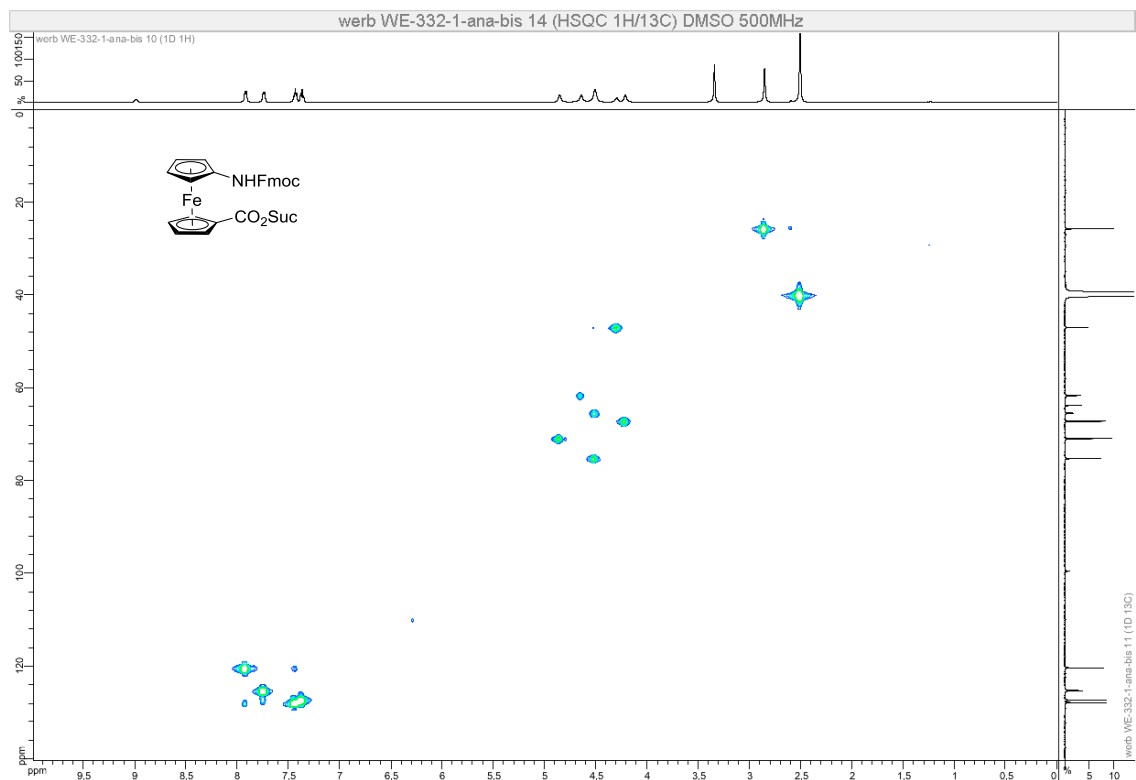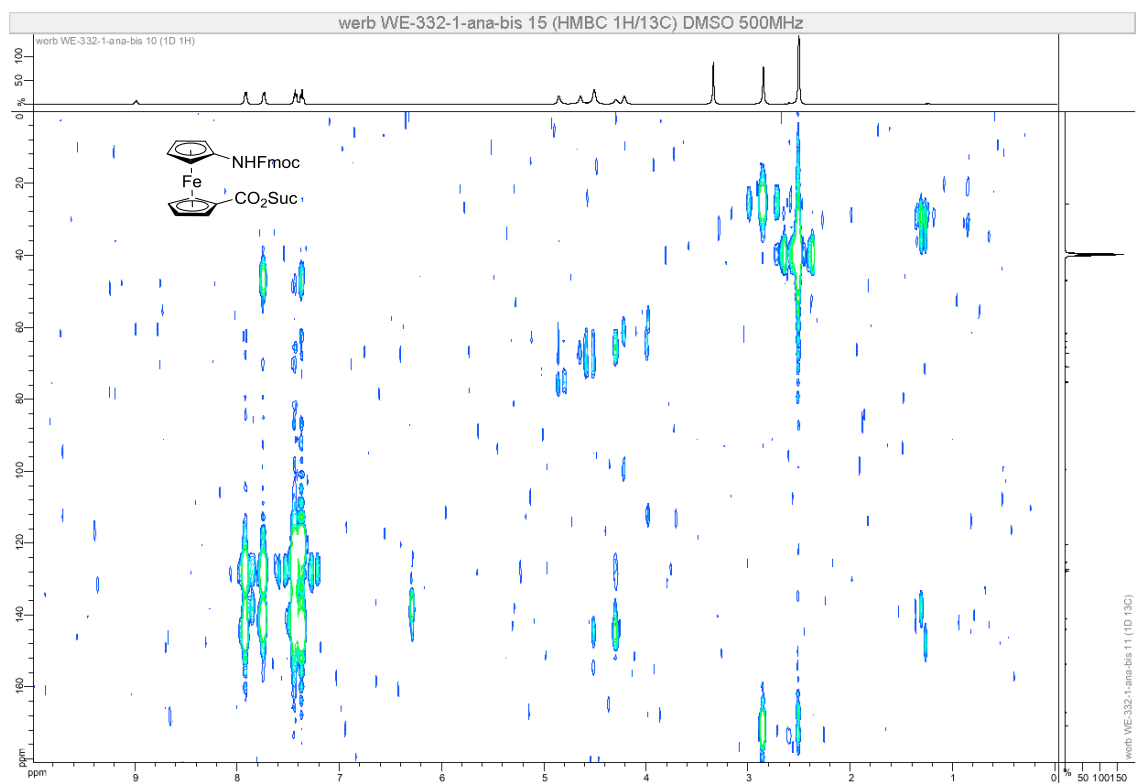



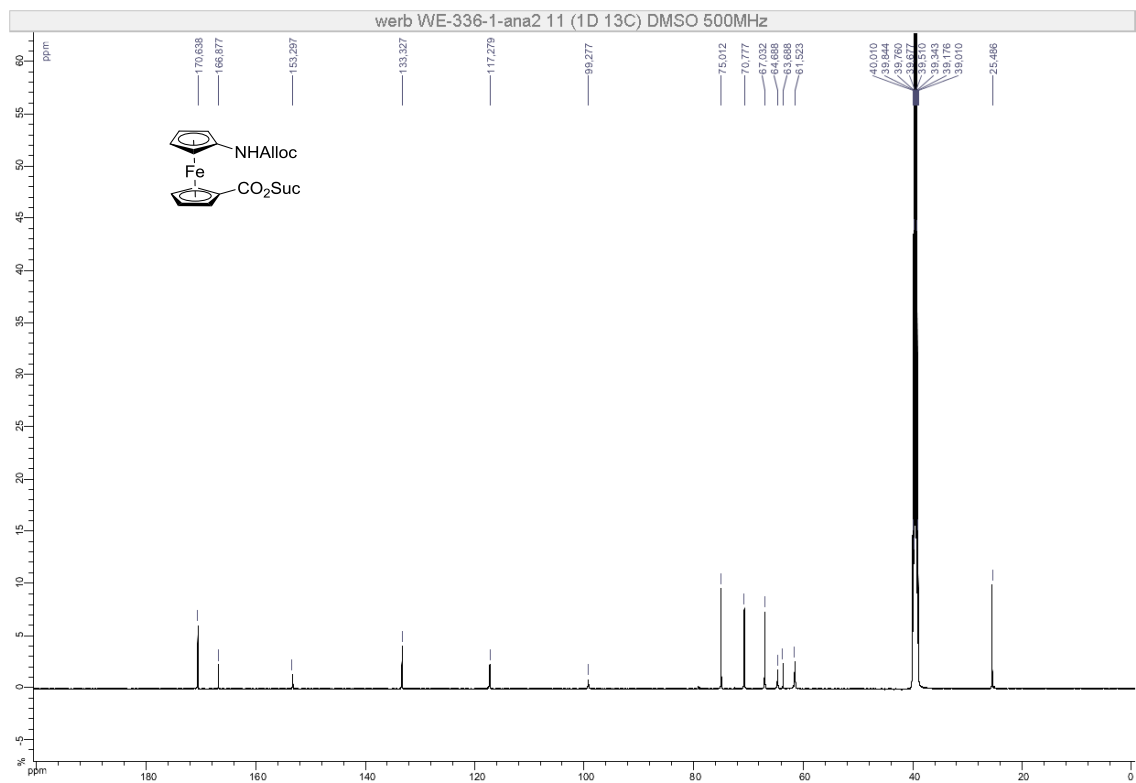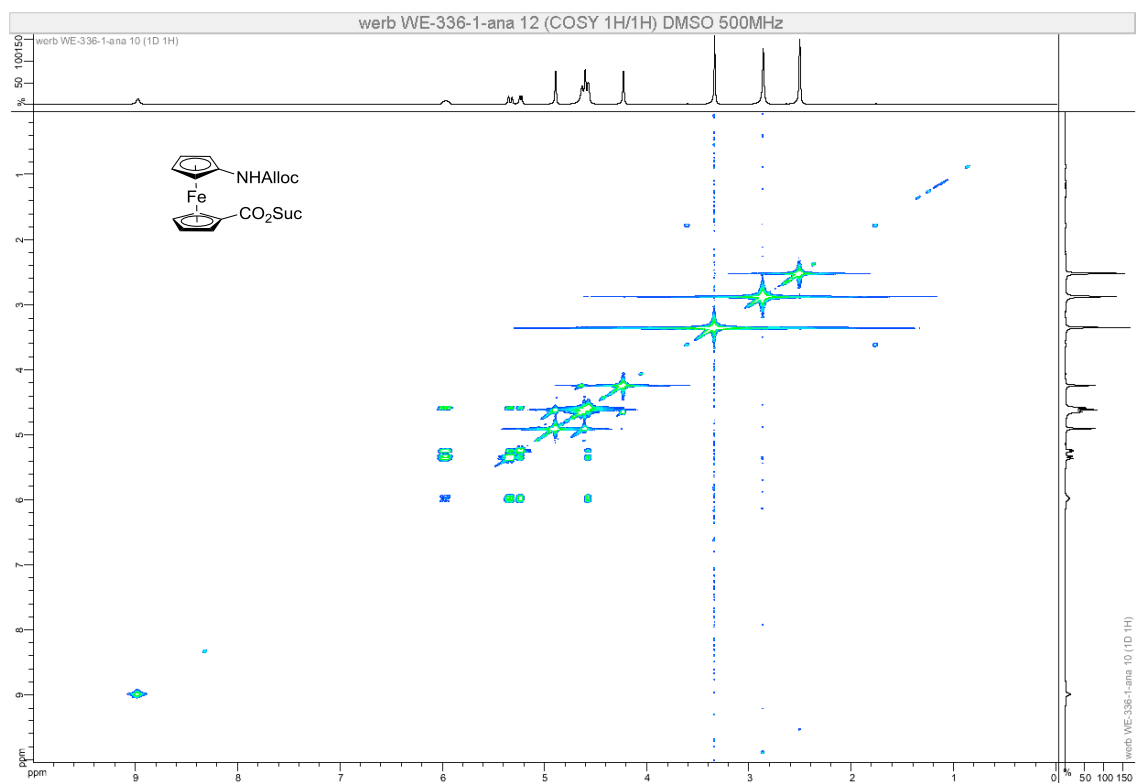

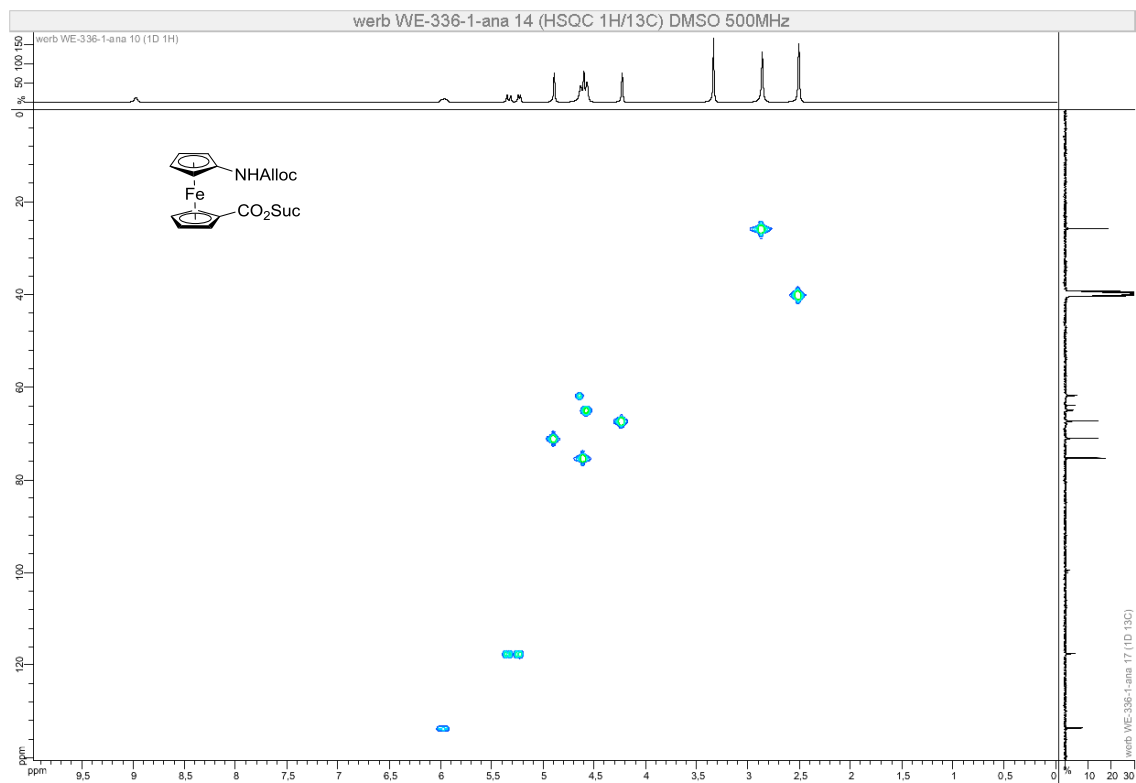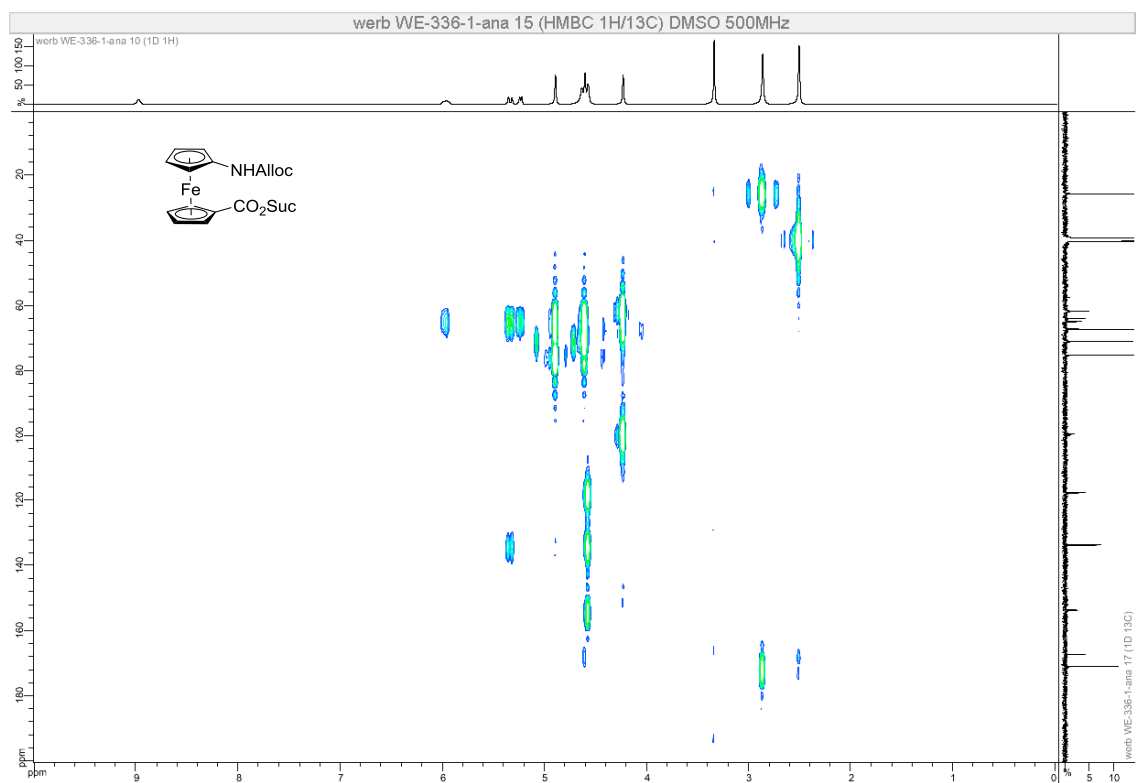



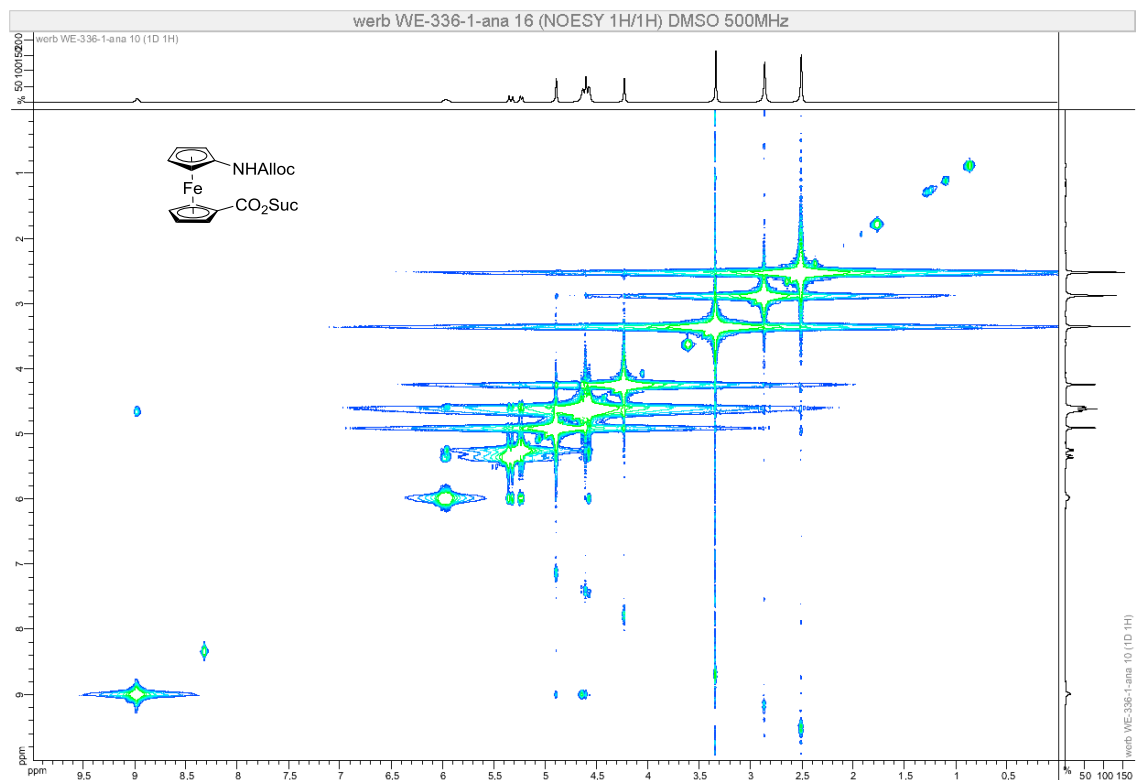

**1'-((*tert*-Butoxycarbonyl)amino)ferrocene-1-carboxylic anhydride - 14**

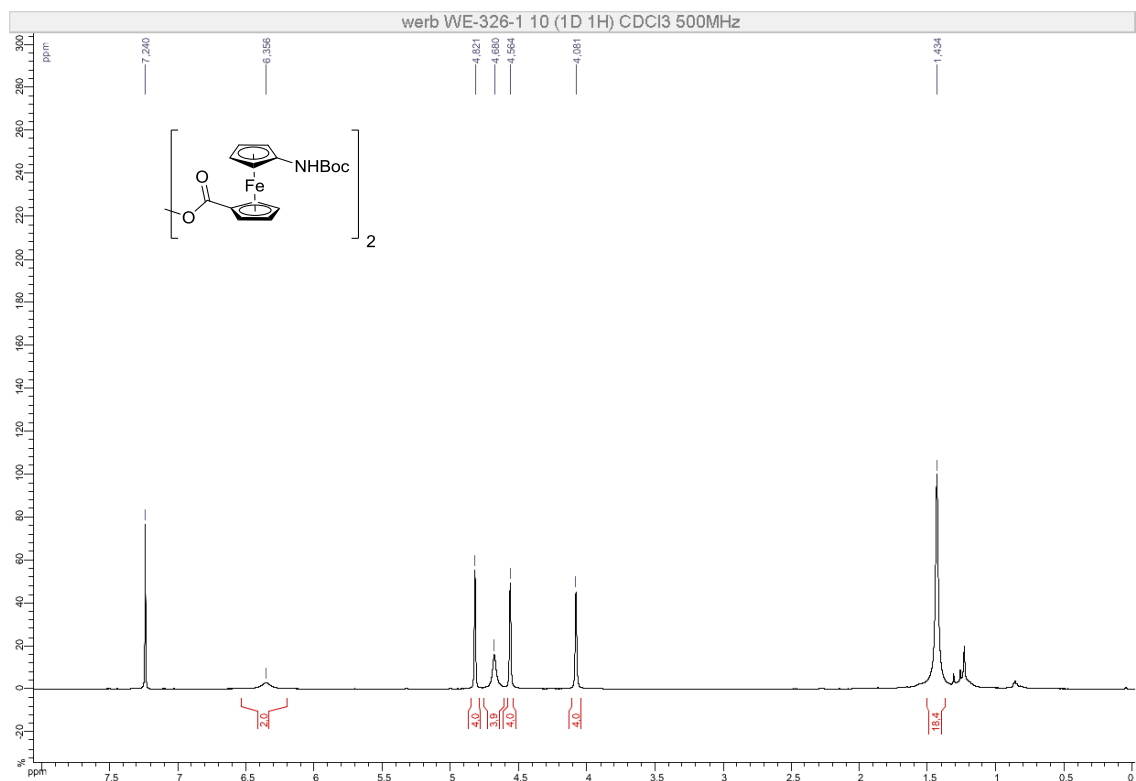

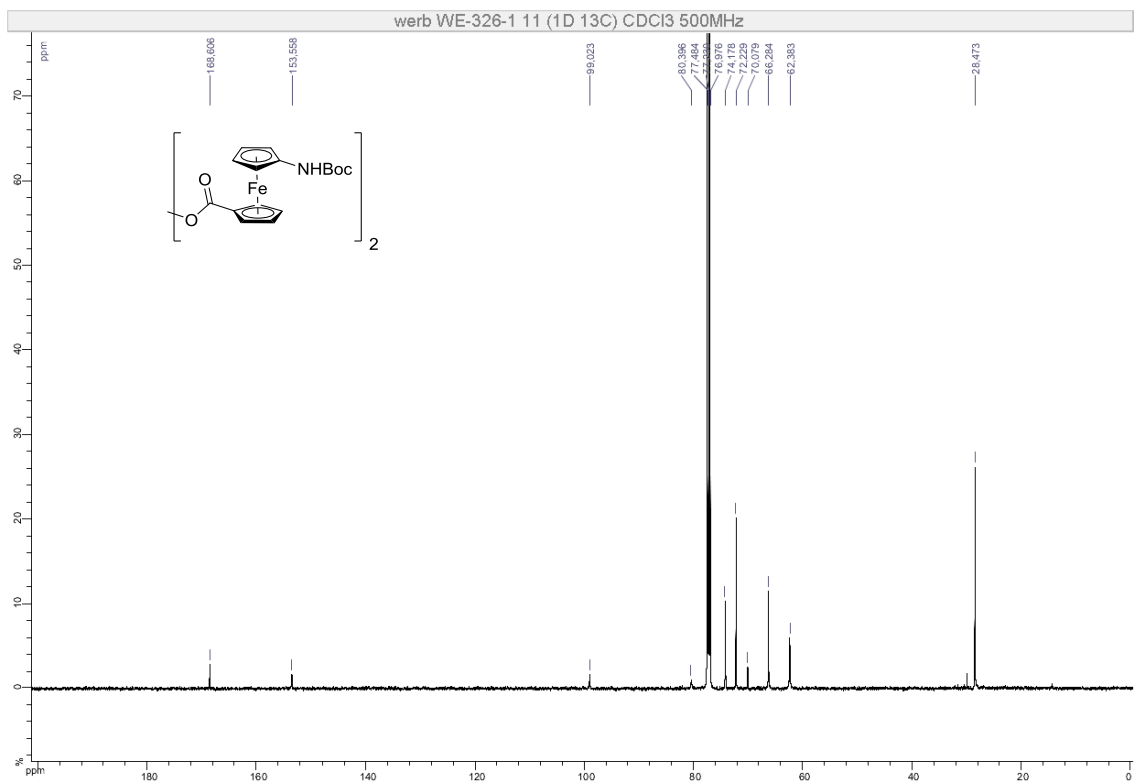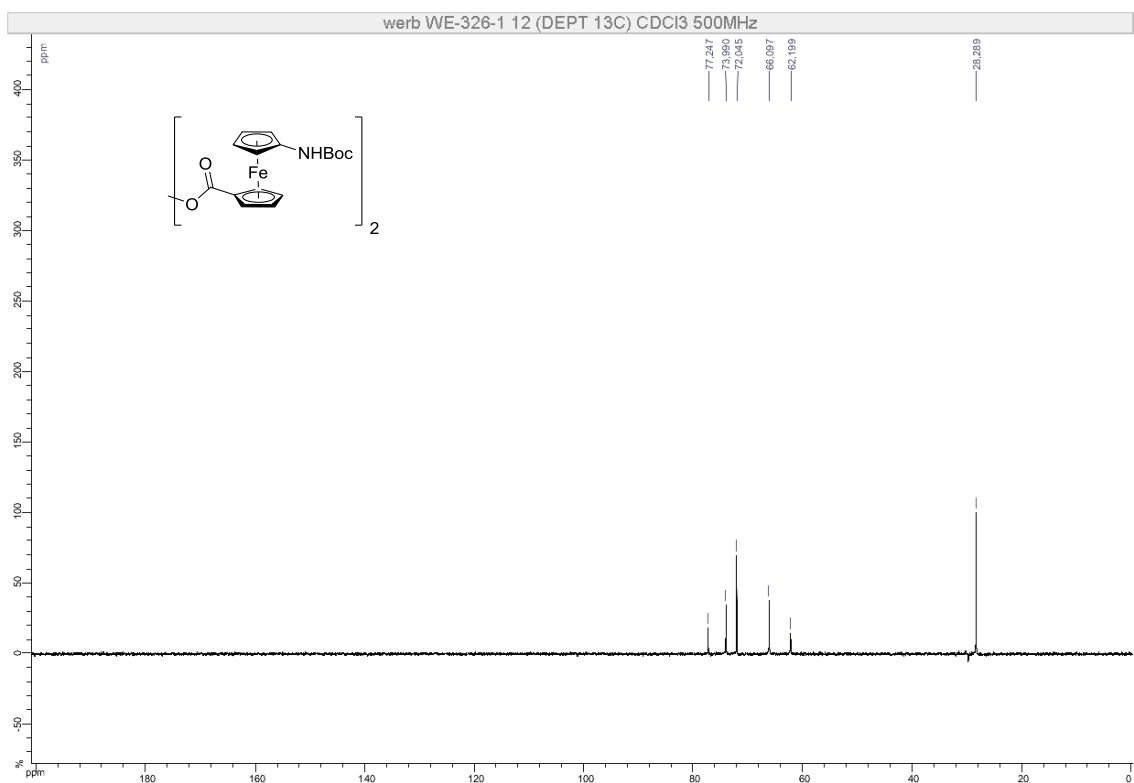

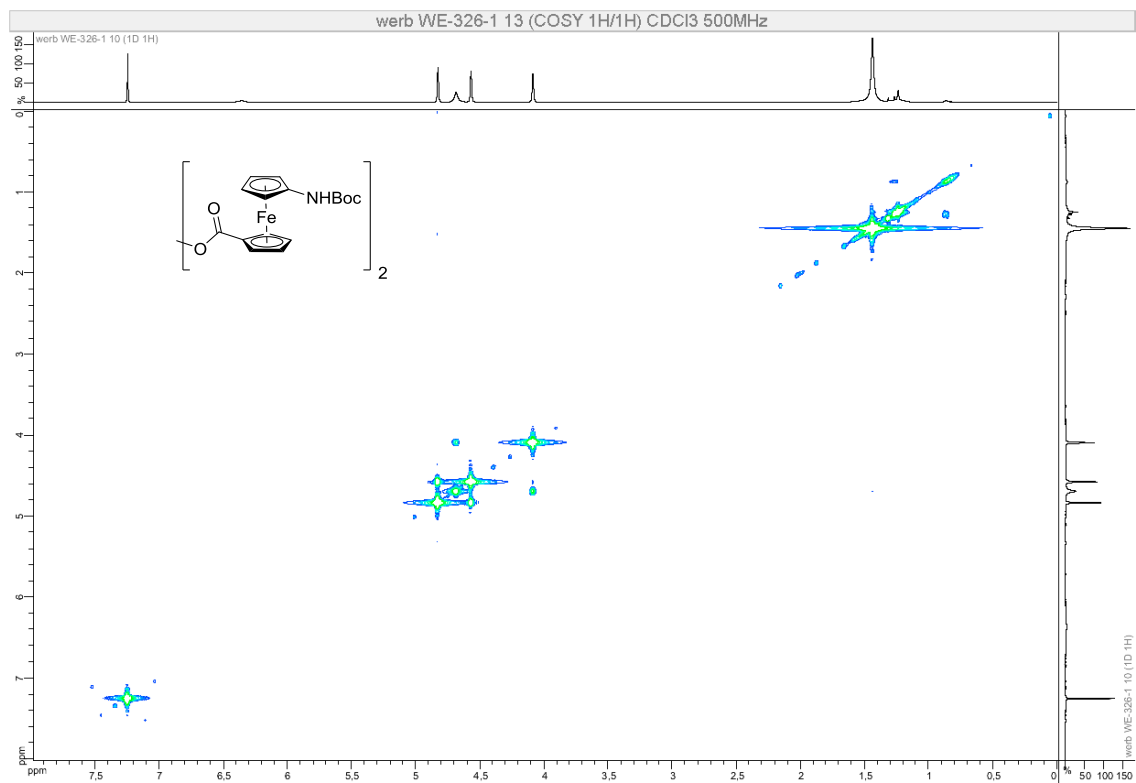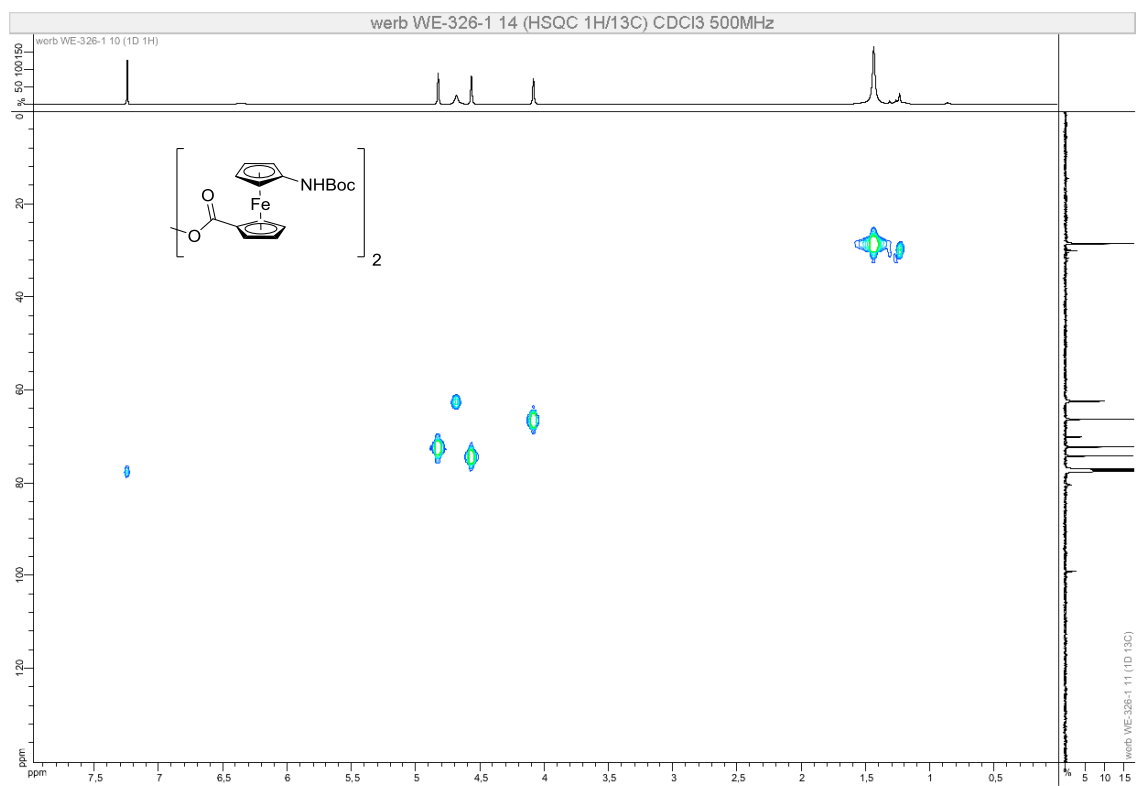

***N*-methyl 1'-((*tert*-butoxycarbonyl)amino)ferrocene-1-carboxamide - 15**

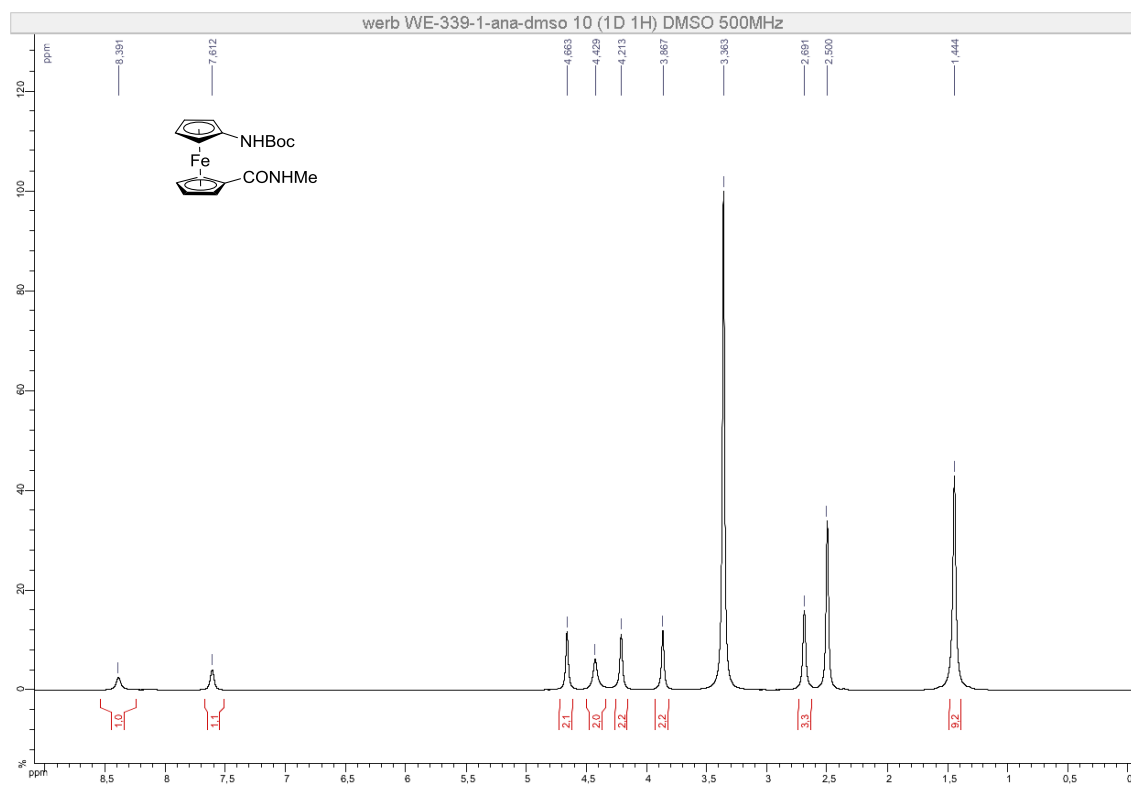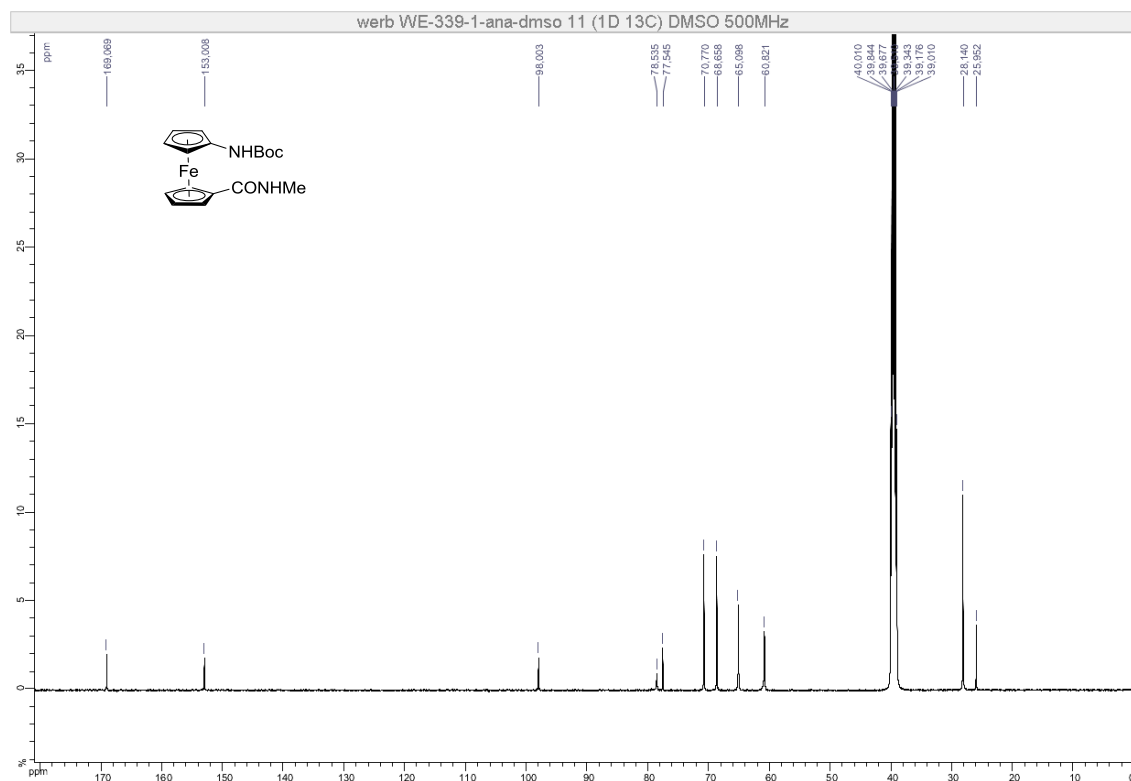

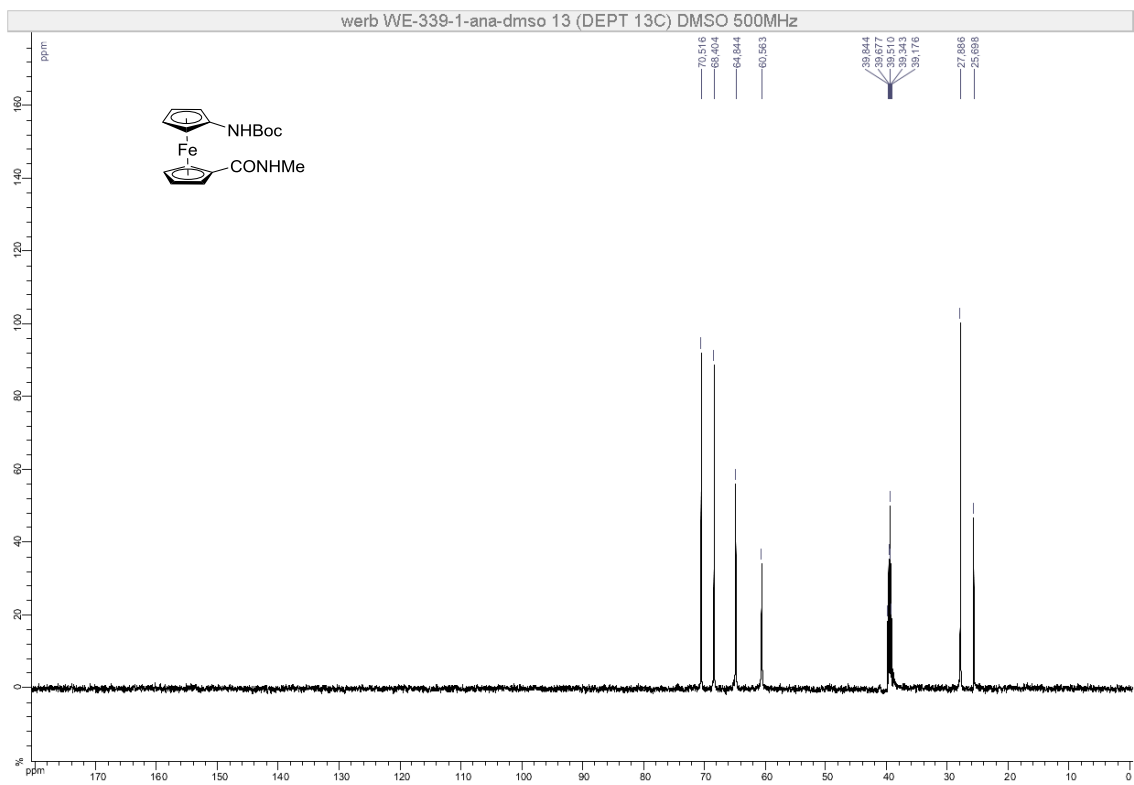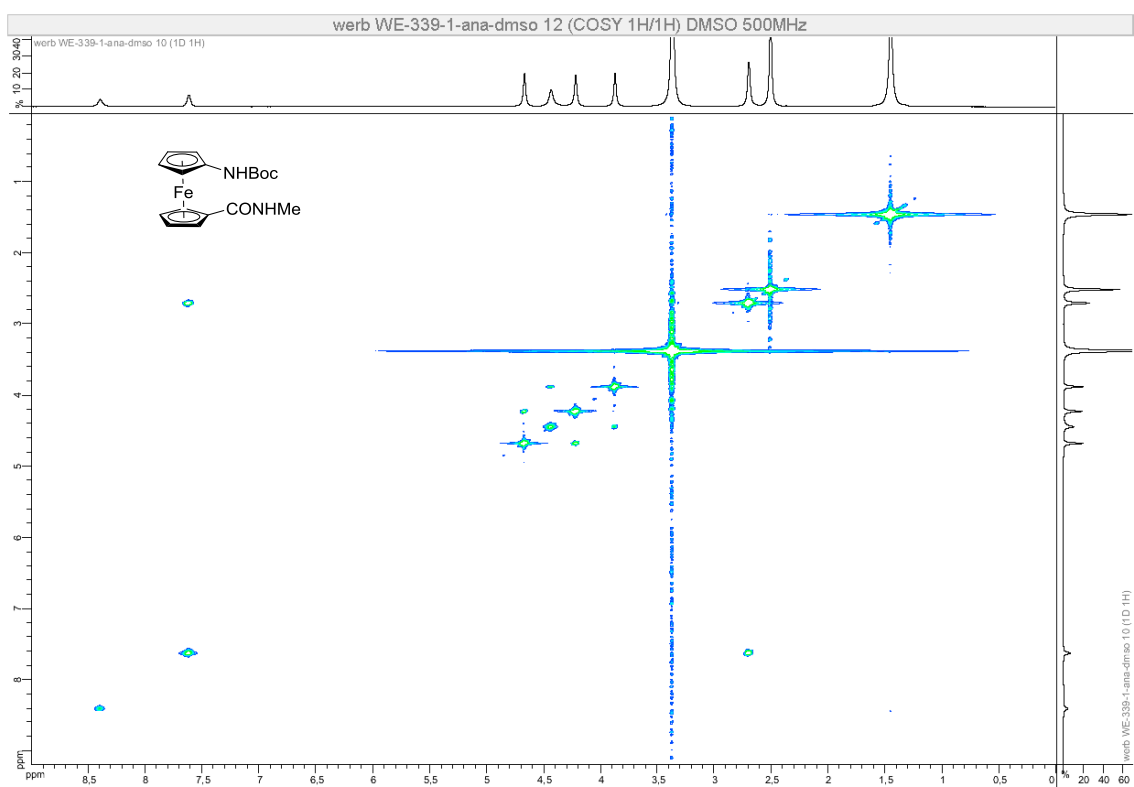

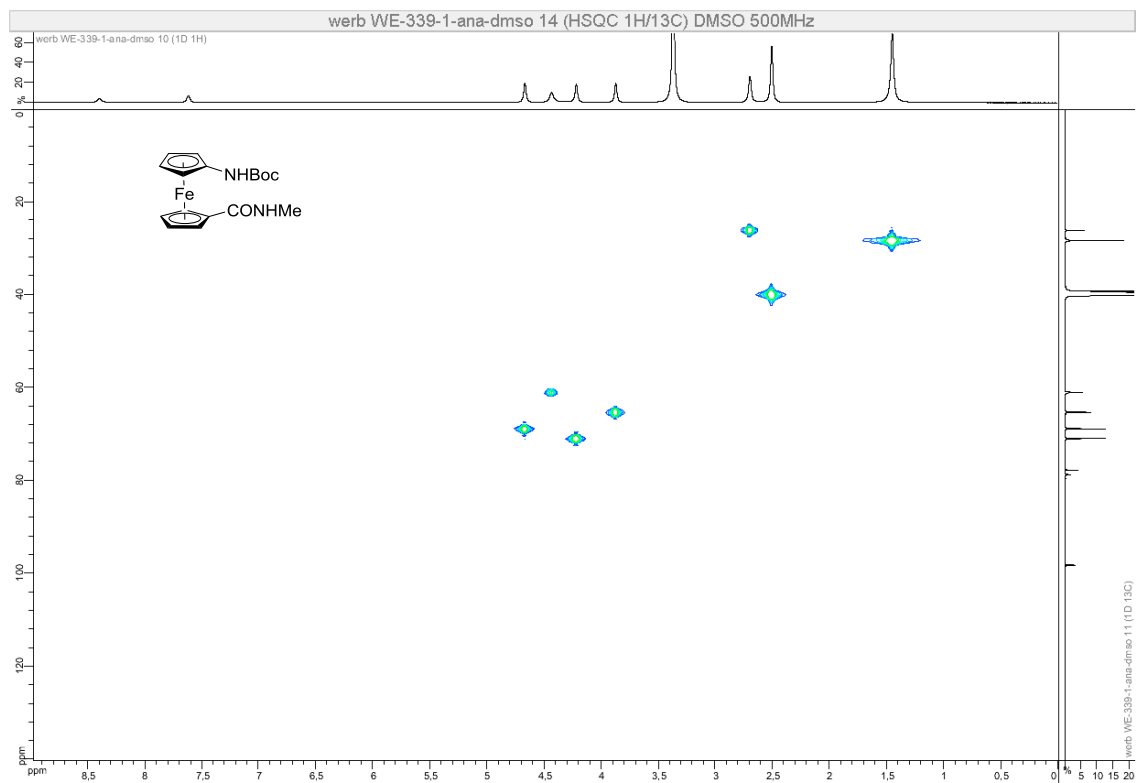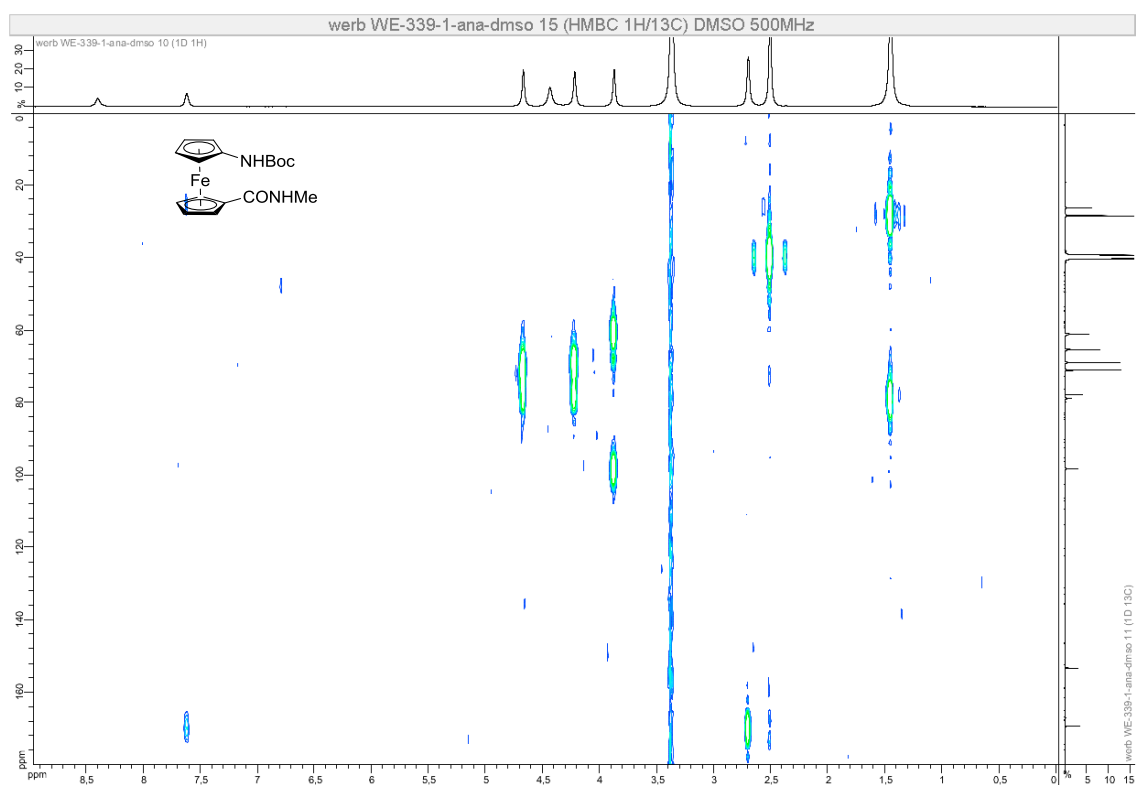

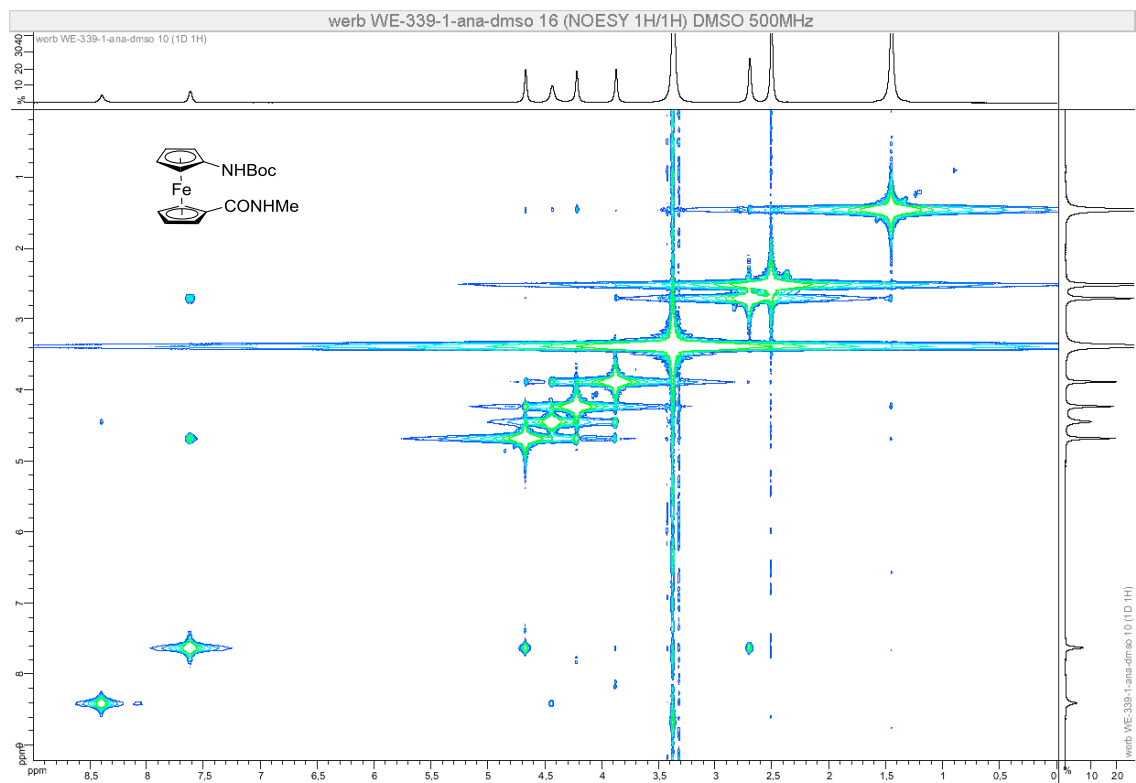

## Dimethyl ferrocene-1,1'-dicarboxylate – SII

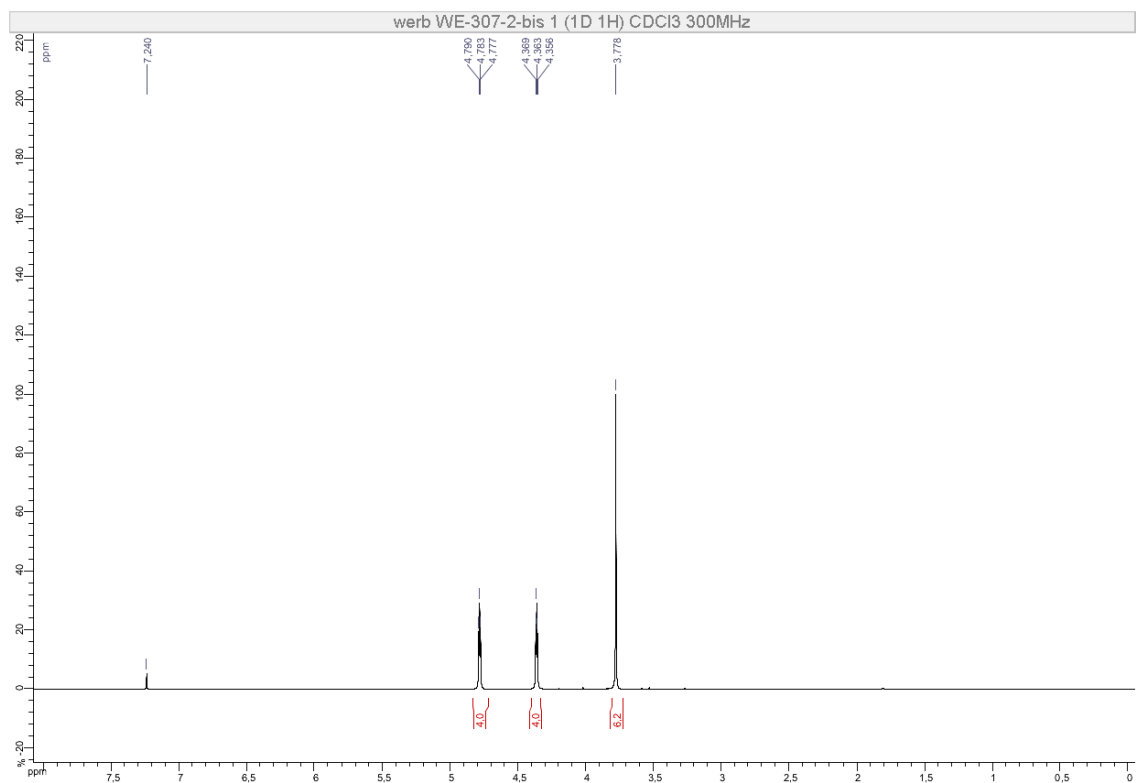

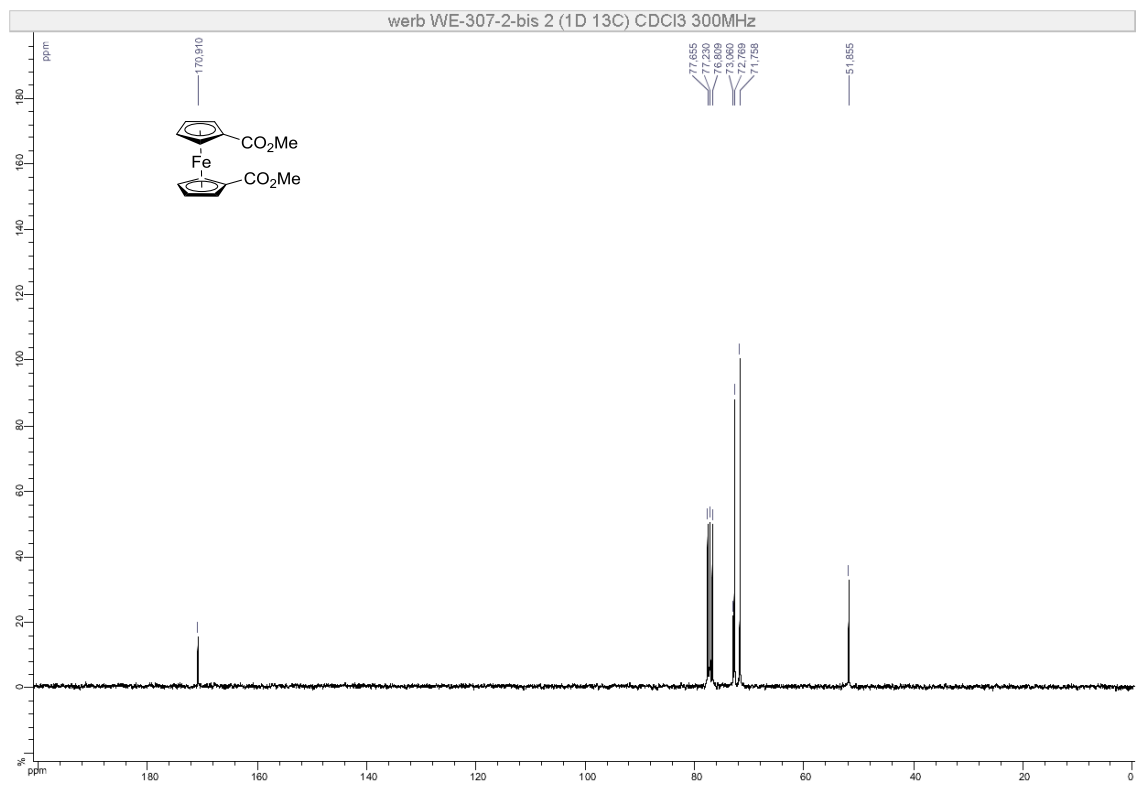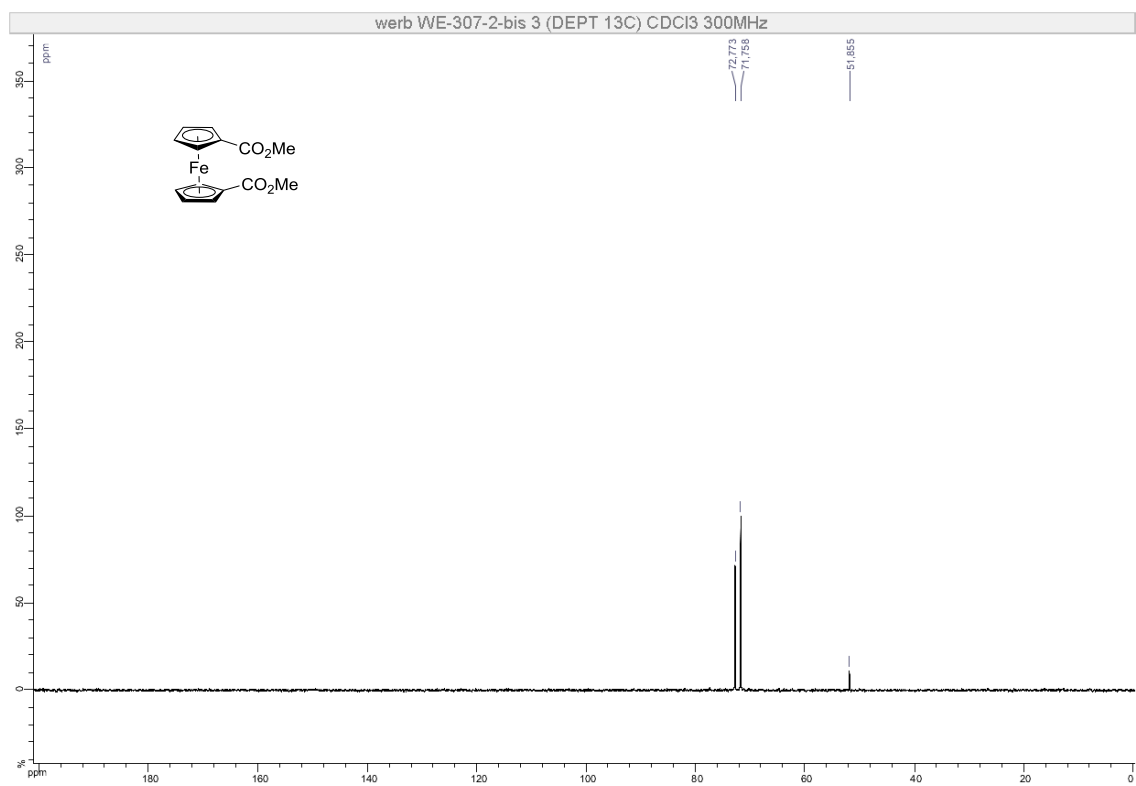



## Methyl ferrocene carboxylate – SI2

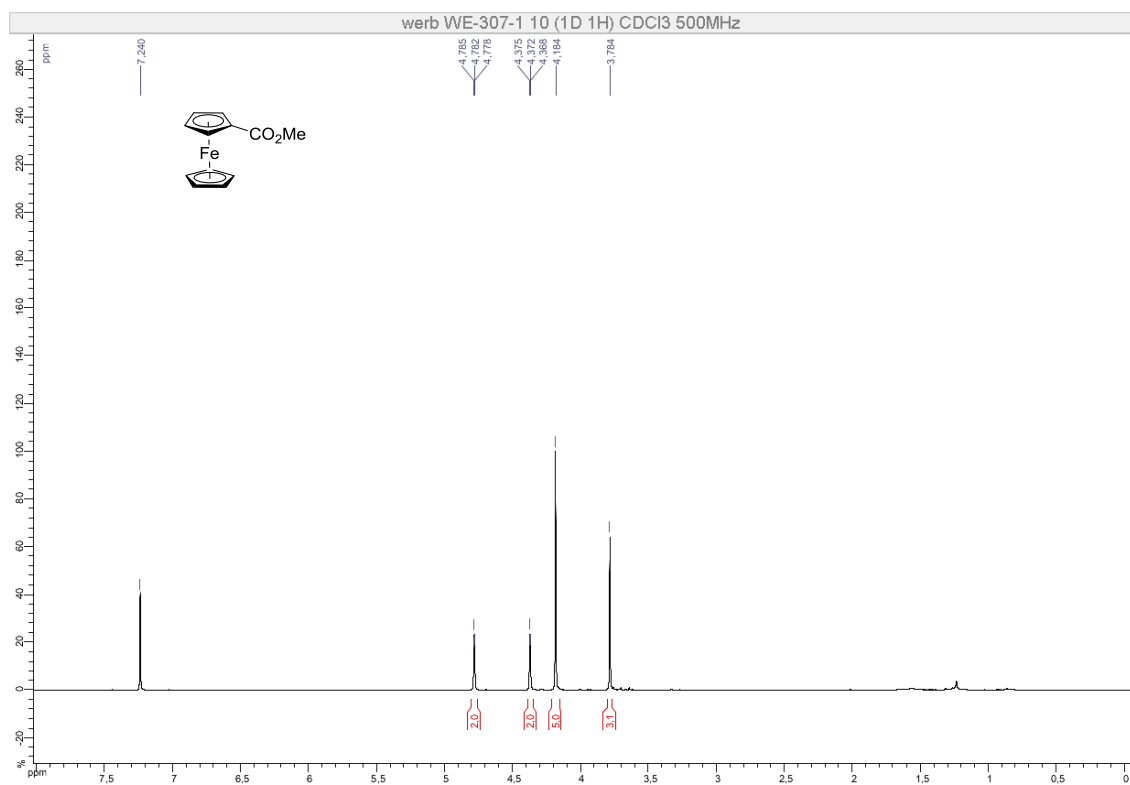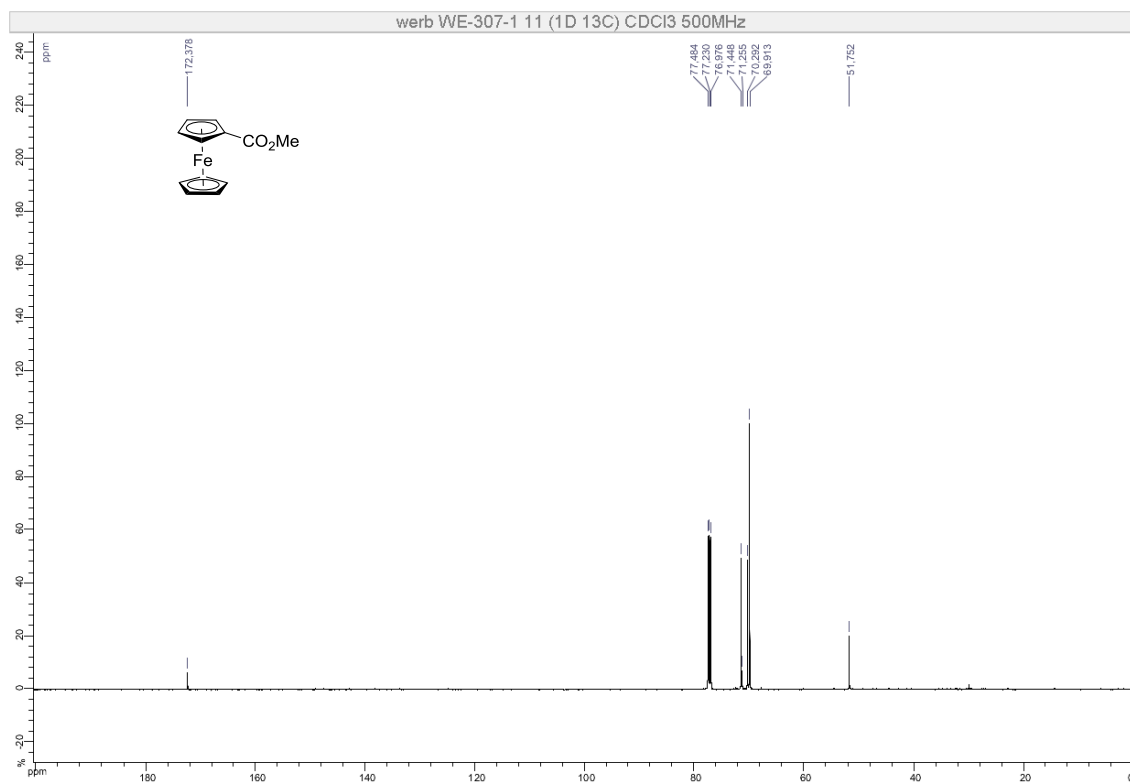

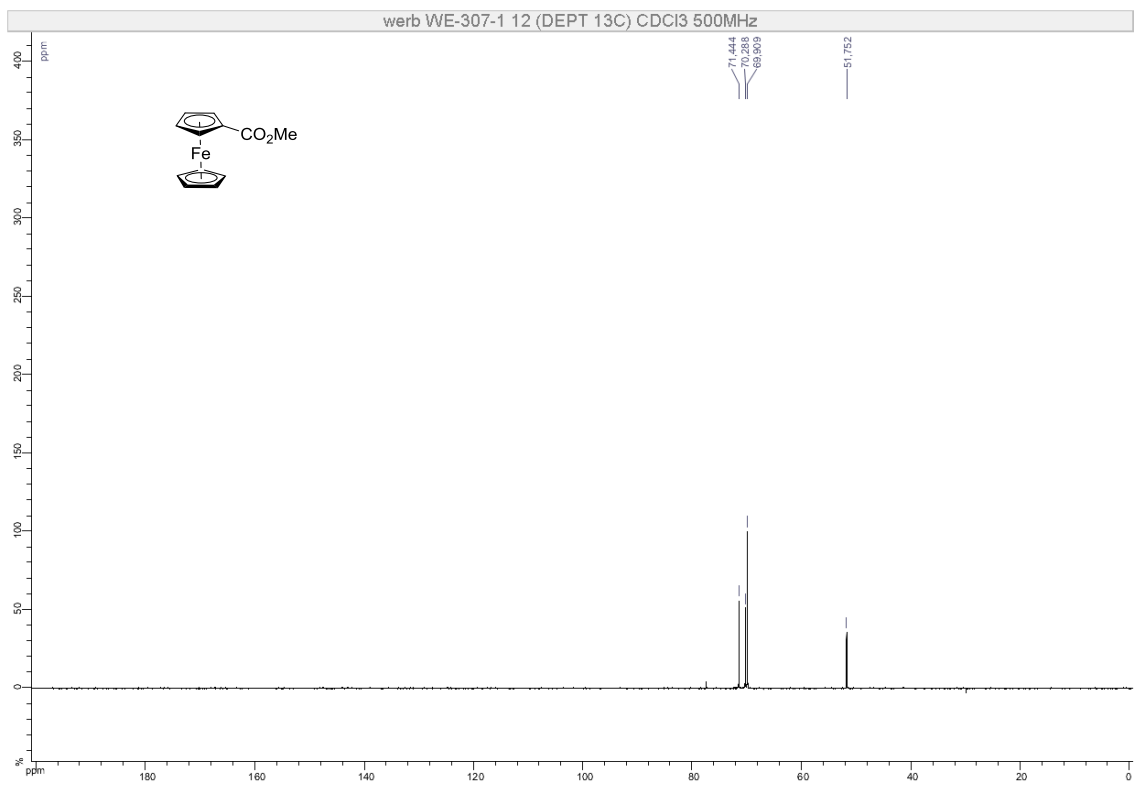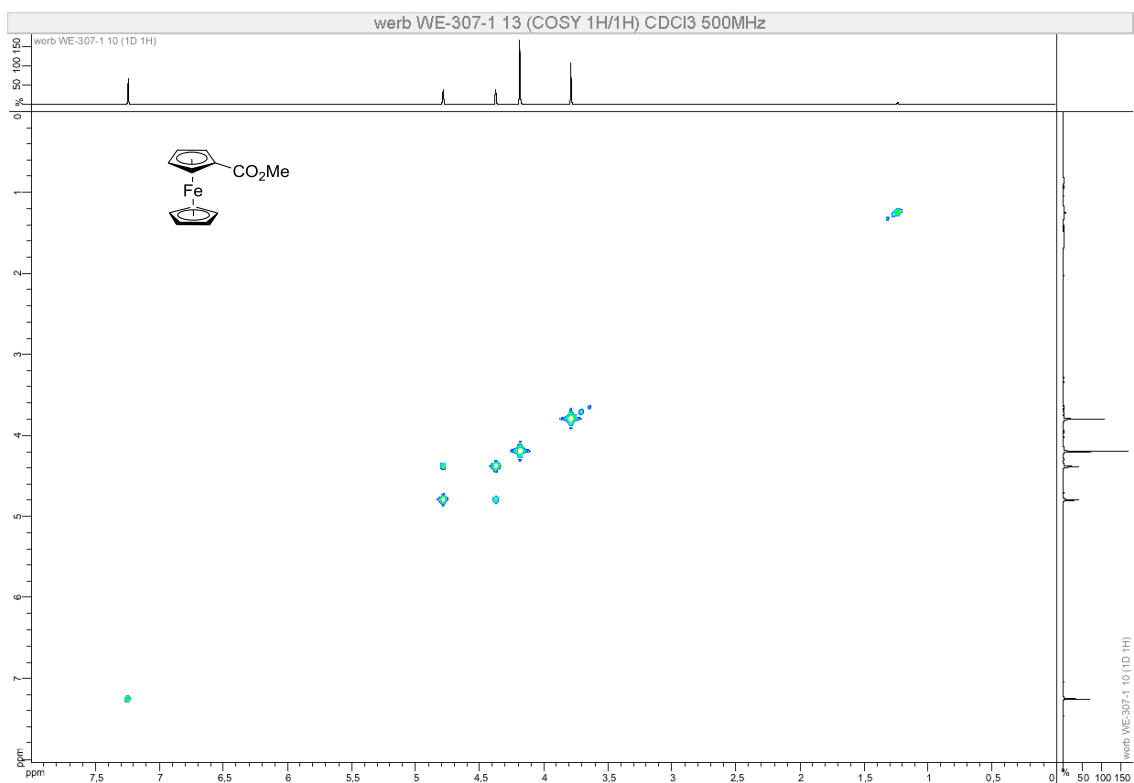

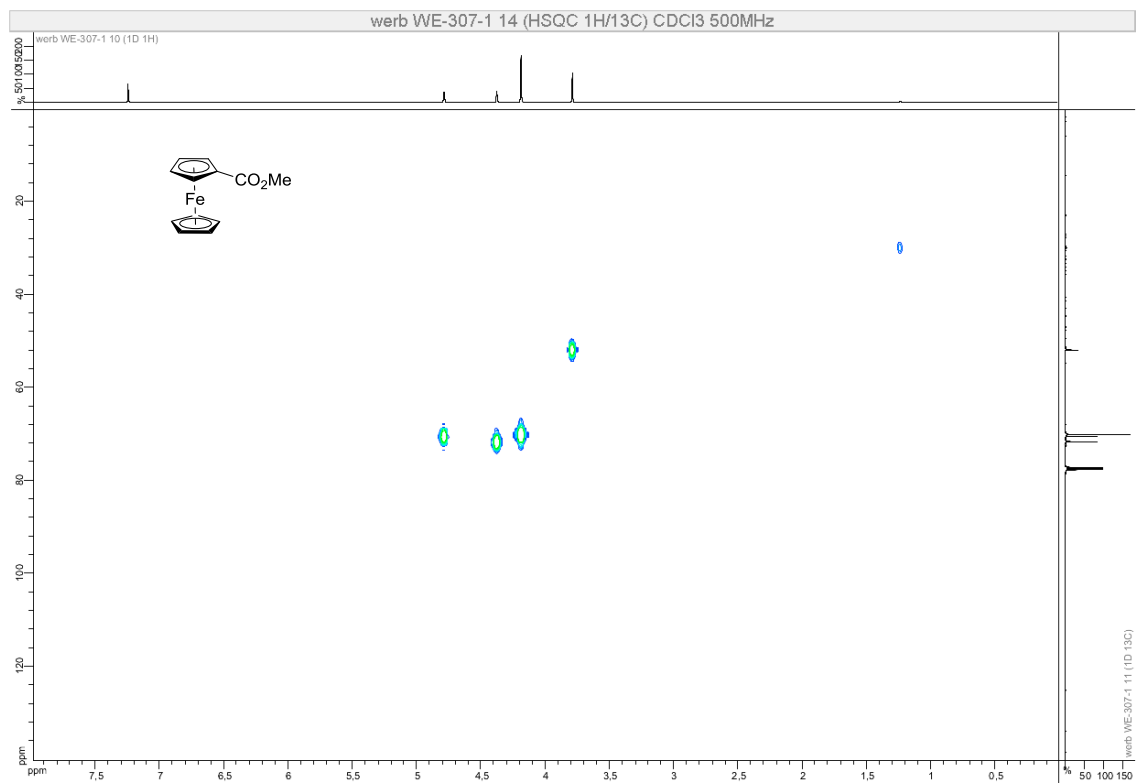

### Sodium ferrocene-1,1'-dicarboxylate – SI3

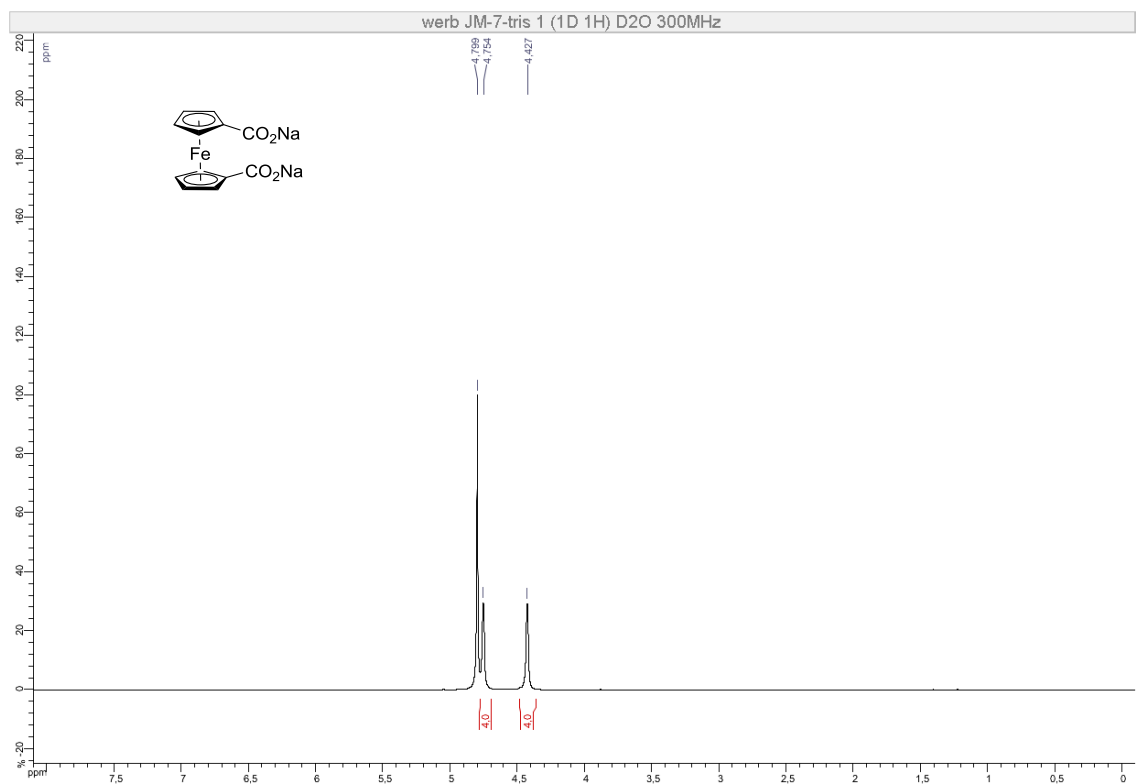

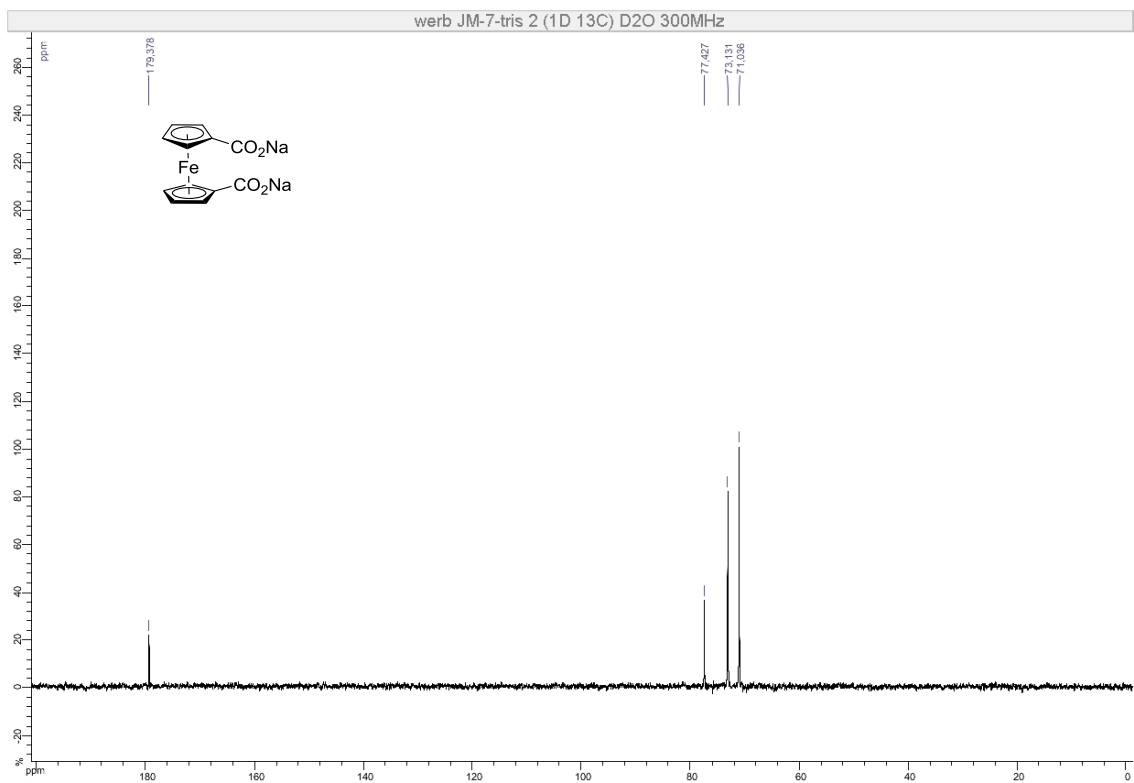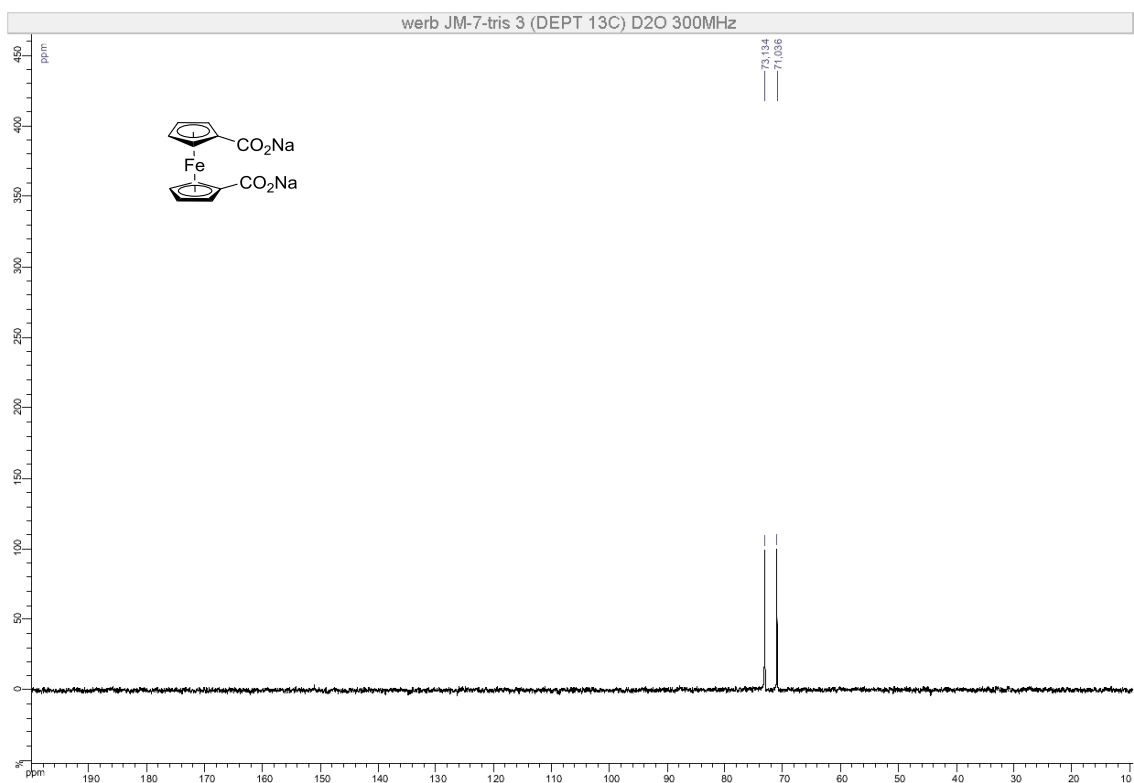

**(9H-Fluoren-9-yl)methanol – SI4**

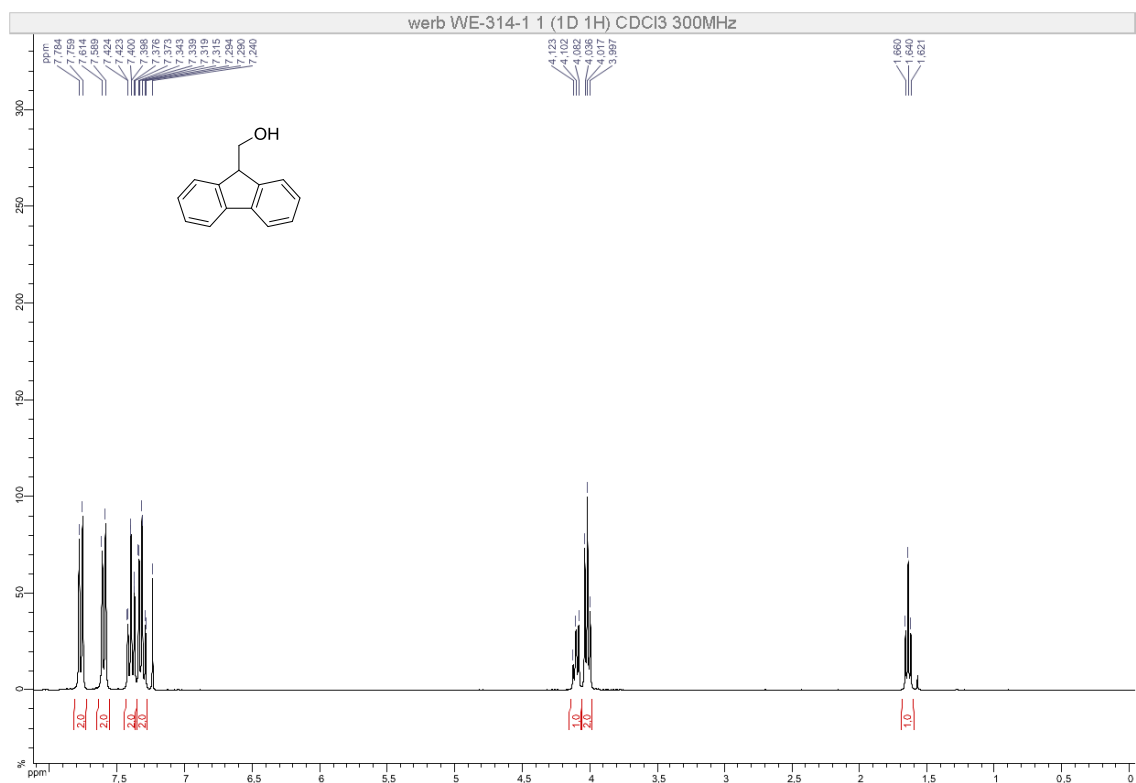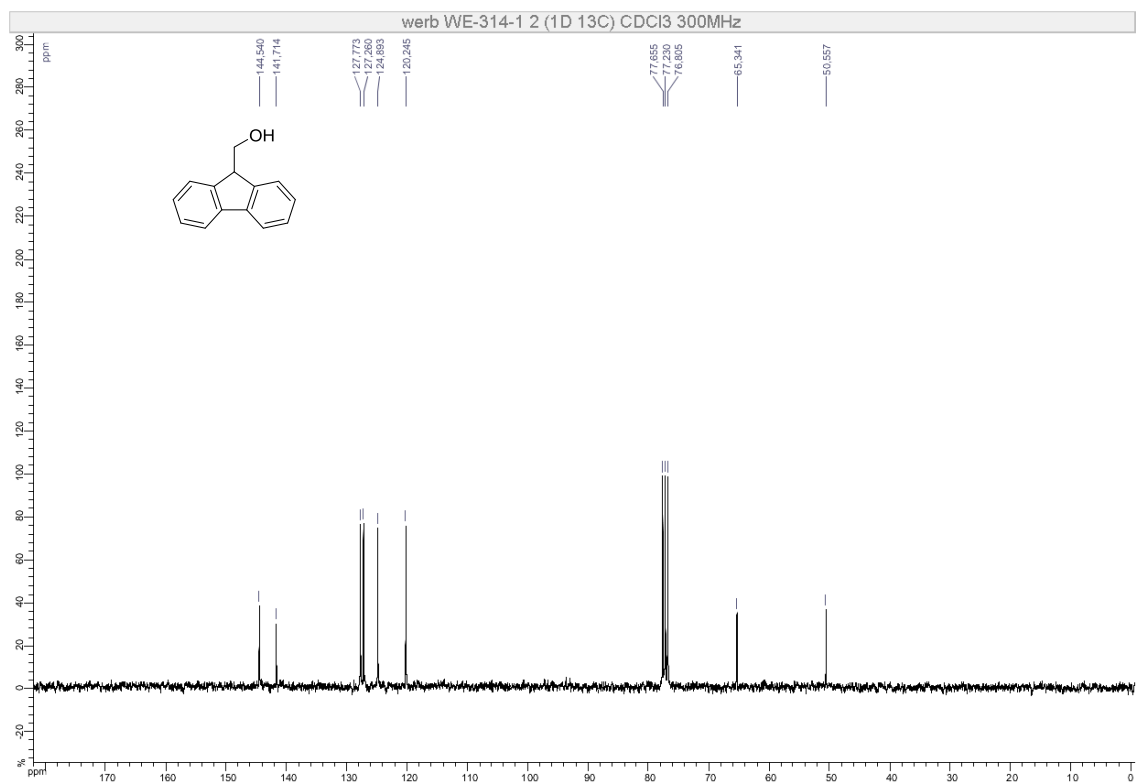

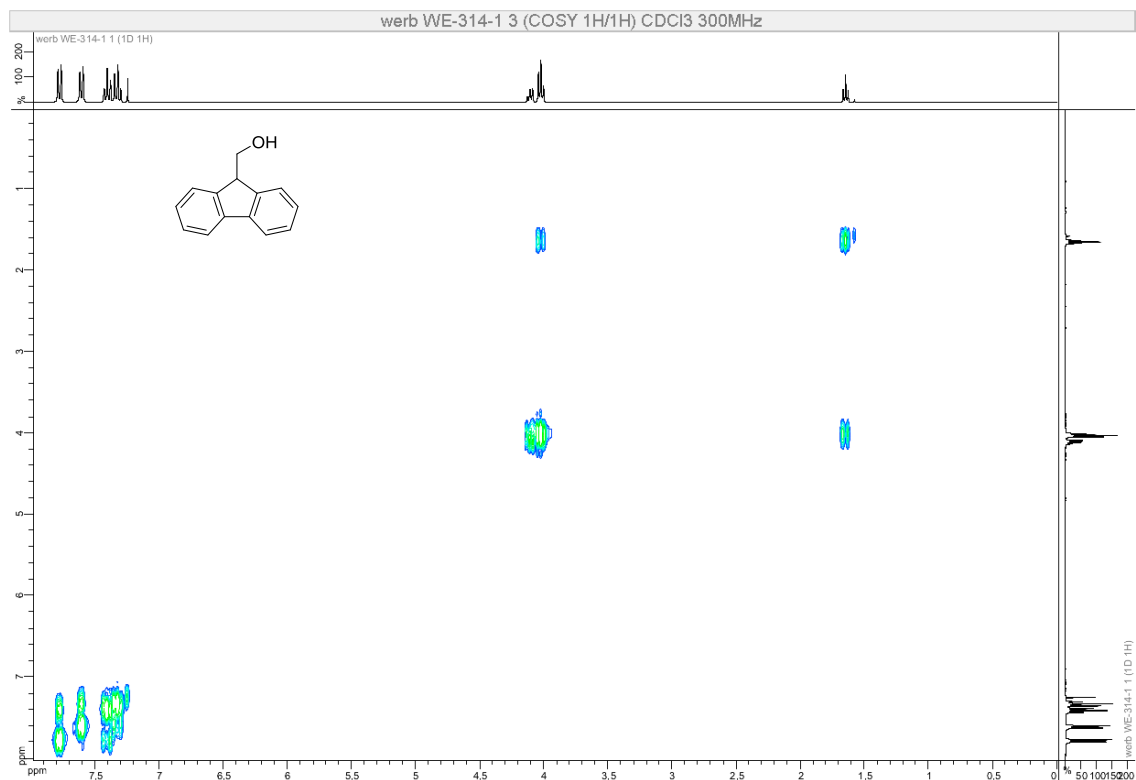

Supplement: c7nj05020h1.pdf [file c7nj05020h1.pdf]
